# Supplementary material for: Palladium(ii)-catalyzed direct O-alkenylation of 2-arylquinazolinones with N-tosylhydrazones: an efficient route to O-alkenylquinazolines
Source: Royal Society of Chemistry journal article supplement (doi:10.1039/c6cc09445g), 2017-01-01
Supplement: c6cc09445g1.pdf [file c6cc09445g1.pdf]

## SUPPORTING INFORMATION

# Palladium(II)-catalyzed direct O-alkenylation of 2-arylquinazolinones with *N*-tosylhydrazones: an efficient route to O-alkenylquinazolines

Rajaka Lingayya,<sup>a, b</sup> Mari Vellakkaran,<sup>a</sup> Kommu Nagaiah,<sup>a, b,\*</sup> Prabhakar Rao Tadikamalla<sup>c</sup> and Jagadeesh Babu Nanubolu<sup>d</sup>

<sup>a</sup> Organic and Biomolecular Chemistry Division, CSIR–Indian Institute of Chemical Technology, Hyderabad–500 007, India E-mail: nagaiah@iict.res.in, nagasaisrikari@gmail.com

<sup>b</sup> Academy of Scientific and Innovative Research (AcSIR), CSIR–Indian Institute of Chemical Technology, Hyderabad–500 007, India

<sup>c</sup> Center for Nuclear Magnetic Resonance, CSIR–Indian Institute of Chemical Technology, Hyderabad–500 007, India

<sup>d</sup> Lab of X-ray Crystallography, CSIR–Indian Institute of Chemical Technology, Hyderabad–500 007, India

### Table of Contents:

| Serial No. | Description                                                        | Page No. |
|------------|--------------------------------------------------------------------|----------|
| 1.1        | General Experimental                                               | S2       |
| 1.2        | Optimization of reaction conditions                                | S2-S3    |
| 1.3        | General Experimental Procedure for Synthesis of Derivatives (1-30) | S3-S4    |
| 1.4        | Analytical Data                                                    | S4-S16   |
| 1.5        | <sup>1</sup> H NMR and <sup>13</sup> C NMR Spectra                 | S17-S48  |
| 1.6        | 2D NMR Studies of <b>4</b>                                         | S49-S52  |
| 1.7        | X-ray Crystallography for <b>4</b>                                 | S53      |

## 1.1 General Experimental Details:

Reactions were carried out in oven dried round-bottomed flasks. All solvents and reagents were used, as received from the suppliers. TLC was performed on Merck Kiesel gel 60, F<sub>254</sub> plates with the layer thickness of 0.25 mm. Column chromatography was performed on silica gel (100-200 mesh) using a gradient of ethyl acetate and hexane as mobile phase. Melting points were determined on a Fisher John's melting point apparatus and are uncorrected. IR spectra were recorded on a Bruker Alpha Spectrometer FT-IR system. <sup>1</sup>H NMR spectral data were collected at 300, 400, 500 & 600 MHz, while <sup>13</sup>C NMR were recorded at 100, 125 and 150 MHz. <sup>1</sup>H NMR spectral data are given as chemical shifts in ppm followed by multiplicity (s- singlet; d- doublet; dd- doublet of doublet; t- triplet; q- quartet; m- multiplet), number of protons and coupling constants. <sup>13</sup>C NMR chemical shifts are expressed in ppm. The mass spectral analyses were carried out using Electrospray Ionization (ESI) techniques. Mass spectra were obtained on a Shimadzu LCMS-2020 mass spectrometer. HRMS (ESI) spectral data were collected using Q-star & ORBITRAP High Resolution Mass Spectrometer.

## 1.2 Optimization of reaction conditions.<sup>a</sup>

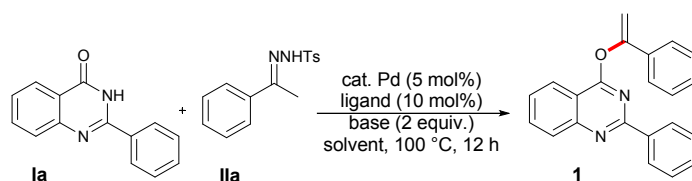

| entry          | catalyst/ligand                                     | base                            | solvent     | yield (%) <sup>b</sup> |
|----------------|-----------------------------------------------------|---------------------------------|-------------|------------------------|
| 1              | Pd(OAc) <sub>2</sub> /none                          | K <sub>2</sub> CO <sub>3</sub>  | 1,4-dioxane | 0                      |
| 2 <sup>c</sup> | Pd(OAc) <sub>2</sub> /none                          | Cs <sub>2</sub> CO <sub>3</sub> | 1,4-dioxane | 0                      |
| 3              | Pd(OAc) <sub>2</sub> /PPh <sub>3</sub>              | Cs <sub>2</sub> CO <sub>3</sub> | 1,4-dioxane | 67                     |
| 4              | Pd(OAc) <sub>2</sub> /PPh <sub>3</sub>              | K <sub>2</sub> CO <sub>3</sub>  | 1,4-dioxane | 33                     |
| 5              | Pd(OAc) <sub>2</sub> /PPh <sub>3</sub>              | KO <sup>t</sup> Bu              | 1,4-dioxane | 21                     |
| 6              | Pd(OAc) <sub>2</sub> /PPh <sub>3</sub>              | LiO <sup>t</sup> Bu             | 1,4-dioxane | 27                     |
| 7              | Pd(OAc) <sub>2</sub> /PPh <sub>3</sub>              | K <sub>3</sub> PO <sub>4</sub>  | 1,4-dioxane | 52                     |
| 8              | Pd(OAc) <sub>2</sub> /PCy <sub>3</sub> <sup>d</sup> | Cs <sub>2</sub> CO <sub>3</sub> | 1,4-dioxane | 41                     |
| 9              | Pd(OAc) <sub>2</sub> /Dppp <sup>d</sup>             | Cs <sub>2</sub> CO <sub>3</sub> | 1,4-dioxane | 31                     |
| 10             | Pd(OAc) <sub>2</sub> /Bpy <sup>d</sup>              | Cs <sub>2</sub> CO <sub>3</sub> | 1,4-dioxane | 35                     |
| 11             | Pd(OAc) <sub>2</sub> /Phen <sup>d</sup>             | Cs <sub>2</sub> CO <sub>3</sub> | 1,4-dioxane | 43                     |

|                       |                                                             |                                     |                      |           |
|-----------------------|-------------------------------------------------------------|-------------------------------------|----------------------|-----------|
| 12                    | Pd(OAc) <sub>2</sub> /Dmphen <sup>d</sup>                   | Cs <sub>2</sub> CO <sub>3</sub>     | 1,4-dioxane          | 28        |
| 13                    | Pd(OAc) <sub>2</sub> /PPh <sub>3</sub>                      | Cs <sub>2</sub> CO <sub>3</sub>     | DCE                  | 30        |
| 14                    | Pd(OAc) <sub>2</sub> /PPh <sub>3</sub>                      | Cs <sub>2</sub> CO <sub>3</sub>     | toluene              | 38        |
| 15                    | Pd(OAc) <sub>2</sub> /PPh <sub>3</sub>                      | Cs <sub>2</sub> CO <sub>3</sub>     | DMF                  | 51        |
| 16                    | Pd(OAc) <sub>2</sub> /PPh <sub>3</sub>                      | Cs <sub>2</sub> CO <sub>3</sub>     | DMAc                 | 0         |
| 17                    | Pd(OAc) <sub>2</sub> /PPh <sub>3</sub>                      | Cs <sub>2</sub> CO <sub>3</sub>     | DMSO                 | 0         |
| 18                    | Pd(OAc) <sub>2</sub> /PPh <sub>3</sub>                      | Cs <sub>2</sub> CO <sub>3</sub>     | MeOH                 | 0         |
| 19                    | Pd(OAc) <sub>2</sub> /PPh <sub>3</sub>                      | Cs <sub>2</sub> CO <sub>3</sub>     | <i>t</i> -AmOH       | 90        |
| 20                    | Pd(OAc) <sub>2</sub> (PPh <sub>3</sub> ) <sub>2</sub> /none | Cs <sub>2</sub> CO <sub>3</sub>     | <i>t</i> -AmOH       | 65        |
| 21                    | PdCl <sub>2</sub> /PPh <sub>3</sub>                         | Cs <sub>2</sub> CO <sub>3</sub>     | <i>t</i> -AmOH       | 41        |
| 22                    | PdCl <sub>2</sub> (MeCN) <sub>2</sub> /PPh <sub>3</sub>     | Cs <sub>2</sub> CO <sub>3</sub>     | <i>t</i> -AmOH       | 20        |
| 23                    | PdCl <sub>2</sub> (PhCN) <sub>2</sub> /PPh <sub>3</sub>     | Cs <sub>2</sub> CO <sub>3</sub>     | <i>t</i> -AmOH       | 13        |
| 24                    | Pd(TFA) <sub>2</sub> /PPh <sub>3</sub>                      | Cs <sub>2</sub> CO <sub>3</sub>     | <i>t</i> -AmOH       | 0         |
| 25 <sup>e</sup>       | Pd(OAc) <sub>2</sub> /PPh <sub>3</sub>                      | Cs <sub>2</sub> CO <sub>3</sub>     | <i>t</i> -AmOH       | 90        |
| <b>26<sup>f</sup></b> | <b>Pd(OAc)<sub>2</sub>/PPh<sub>3</sub></b>                  | <b>Cs<sub>2</sub>CO<sub>3</sub></b> | <b><i>t</i>-AmOH</b> | <b>90</b> |
| 27 <sup>g</sup>       | Pd(OAc) <sub>2</sub> /PPh <sub>3</sub>                      | Cs <sub>2</sub> CO <sub>3</sub>     | <i>t</i> -AmOH       | 44        |
| 28 <sup>h</sup>       | Pd(OAc) <sub>2</sub> /PPh <sub>3</sub>                      | Cs <sub>2</sub> CO <sub>3</sub>     | <i>t</i> -AmOH       | 10        |
| 29                    | Pd <sub>2</sub> (dba) <sub>3</sub> /PPh <sub>3</sub>        | Cs <sub>2</sub> CO <sub>3</sub>     | <i>t</i> -AmOH       | 17        |
| 30                    | Pd(PPh <sub>3</sub> ) <sub>4</sub> /none                    | Cs <sub>2</sub> CO <sub>3</sub>     | <i>t</i> -AmOH       | 21        |
| 31                    | none/PPh <sub>3</sub>                                       | Cs <sub>2</sub> CO <sub>3</sub>     | <i>t</i> -AmOH       | 0         |
| 32                    | Pd(OAc) <sub>2</sub> /PPh <sub>3</sub>                      | none                                | <i>t</i> -AmOH       | 0         |
| 33 <sup>i</sup>       | Pd(OAc) <sub>2</sub> /PPh <sub>3</sub>                      | Cs <sub>2</sub> CO <sub>3</sub>     | <i>t</i> -AmOH       | 90        |
| 34 <sup>j</sup>       | Pd(OAc) <sub>2</sub> (PPh <sub>3</sub> ) <sub>2</sub> /none | Cs <sub>2</sub> CO <sub>3</sub>     | <i>t</i> -AmOH       | 41        |

<sup>a</sup>Unless specified, the reaction was carried out with **Ia** (0.5 mmol), **IIa** (0.5 mmol), catalyst (5 mol%), ligand (10 mol%), base (2 equiv.) in a solvent (3 mL) at 100 °C for 12 h, in open air. <sup>b</sup>Isolated yield (average of two runs). <sup>c</sup>TBAI (20 mol%) was used. <sup>d</sup>PCy<sub>3</sub> = tricyclohexylphosphine, Dppp = 1,3-bis(diphenylphosphino)propane, Bpy = 2,2'-bipyridyl, Phen = 1,10-phenanthroline, Dmphen = 2,9-dimethyl-1,10-phenanthroline. <sup>e</sup>At 80 °C. <sup>f</sup>Pd(OAc)<sub>2</sub> (2.5 mol%), PPh<sub>3</sub> (5 mol%), Cs<sub>2</sub>CO<sub>3</sub> (1 equiv.) at 80 °C. <sup>g</sup>Pd(OAc)<sub>2</sub> (1 mol%), PPh<sub>3</sub> (2 mol%), Cs<sub>2</sub>CO<sub>3</sub> (1 equiv.) at 80 °C. <sup>h</sup>Under N<sub>2</sub>. <sup>i</sup>Under O<sub>2</sub> (balloon). <sup>j</sup>CuCl<sub>2</sub> (2 equiv.) was used.

### 1.3 General Experimental Procedure for Synthesis of Derivatives (1-30).

A mixture of quinazolinone (**Ia**, 0.5 mmol, 1.0 equiv.), *N*-tosylhydrazone (**IIa**, 0.5 mmol, 1.0 equiv.), Cs<sub>2</sub>CO<sub>3</sub> (0.5 mmol, 1.0 equiv.), Pd(OAc)<sub>2</sub> (2.8 mg, 2.5 mol%), PPh<sub>3</sub> (6.5 mg, 5 mol%), and *tert*-amyl alcohol (3.0 mL) were added to a round-bottomed flask. The reaction mixture was stirred in open air at 80 °C and the progress of the reaction was monitored by

TLC. After completion of the reaction, the mixture was cooled to room temperature. The reaction mixture was partitioned between ethyl acetate (25.0 mL) and water (25.0 mL) in a separatory funnel. The organic layer was washed with water, and brine, dried over anhydrous  $\text{Na}_2\text{SO}_4$  (s) and concentrated under vacuum. The residue was purified by column chromatography using a gradient of hexane and ethyl acetate as the eluent system to afford the pure products.

#### 1.4 Analytical data

##### 2-Phenyl-4-((1-phenylvinyl)oxy)quinazoline (1).

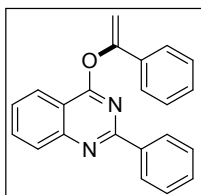

Yield: 90% (145 mg); pale yellow solid; mp: 163–165 °C; IR (neat):  $\nu_{\text{max}} = 3063, 3028, 2923, 2853, 1718, 1622, 1575, 1557, 1490, 1349, 1264, 1068, 946, 757, 696 \text{ cm}^{-1}$ ;  $^1\text{H NMR}$  (500 MHz,  $\text{CDCl}_3$ ):  $\delta$  8.37 (d,  $J = 8.1 \text{ Hz}$ , 1H), 8.31 (d,  $J = 3.6 \text{ Hz}$ , 2H), 8.02 (d,  $J = 8.4 \text{ Hz}$ , 1H), 7.83 (t,  $J = 7.6 \text{ Hz}$ , 1H), 7.57 (dd,  $J = 18.6, 7.4 \text{ Hz}$ , 3H), 7.38 (d,  $J = 2.3 \text{ Hz}$ , 2H), 7.31 – 7.27 (m, 4H), 5.60 (d,  $J = 1.3 \text{ Hz}$ , 1H), 5.28 (d,  $J = 1.3 \text{ Hz}$ , 1H);  $^{13}\text{C NMR}$  (100 MHz,  $\text{CDCl}_3$ ):  $\delta$  166.1, 160.0, 155.2, 152.5, 137.6, 135.0, 133.8, 130.4, 128.7, 128.4, 128.2, 128.1, 127.8, 126.7, 125.2, 123.3, 114.8, 101.9; MS (ESI):  $m/z$ : 325  $[\text{M}+\text{H}]^+$ ; HRMS (ESI):  $m/z$ : calcd for  $\text{C}_{22}\text{H}_{17}\text{ON}_2$ : 325.13354  $[\text{M}+\text{H}]^+$ ; found: 325.13318.

##### 2-Phenyl-4-((1-(*p*-tolyl)vinyl)oxy)quinazoline (2).

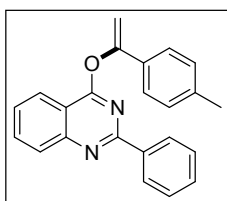

Yield: 91% (153 mg); white solid; mp: 173–175 °C; IR (neat):  $\nu_{\text{max}} = 3062, 3028, 2923, 2853, 1735, 1621, 1575, 1557, 1488, 1457, 1387, 1348, 1261, 1066, 945, 770, 709 \text{ cm}^{-1}$ ;  $^1\text{H NMR}$  (500 MHz,  $\text{CDCl}_3$ ):  $\delta$  8.39 (dd,  $J = 8.2, 0.8 \text{ Hz}$ , 1H), 8.32 (dd,  $J = 6.6, 3.3 \text{ Hz}$ , 2H), 8.03 (d,  $J = 8.4 \text{ Hz}$ , 1H), 7.89 – 7.86 (m, 1H), 7.62 – 7.59 (m, 1H), 7.49 (d,  $J = 8.2 \text{ Hz}$ , 2H), 7.41 – 7.39 (m, 3H), 7.12 (d,  $J = 8.0 \text{ Hz}$ , 2H), 5.56 (d,  $J = 2.0 \text{ Hz}$ , 1H), 5.23 (d,  $J = 2.0 \text{ Hz}$ , 1H), 2.31 (s, 3H);  $^{13}\text{C NMR}$  (125

MHz, CDCl<sub>3</sub>):  $\delta$  166.2, 160.0, 155.3, 152.5, 138.7, 137.7, 133.8, 132.2, 130.4, 129.1, 128.4, 128.2, 128.1, 126.7, 125.2, 123.4, 114.9, 101.1, 21.2; MS (ESI):  $m/z$ : 339 [M+H]<sup>+</sup>; HRMS (ESI):  $m/z$ : calcd for C<sub>23</sub>H<sub>19</sub>ON<sub>2</sub>: 339.14919 [M+H]<sup>+</sup>; found: 339.14858.

#### 4-((1-(4-Methoxyphenyl)vinyl)oxy)-2-phenylquinazoline (3).

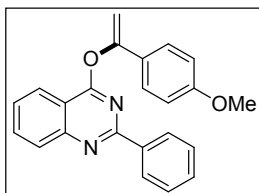

Yield: 86% (152 mg); white solid; mp: 198–200 °C; IR (neat):  $\nu_{\max}$  = 3064, 2922, 2851, 1713, 1611, 1513, 1451, 1243, 1029, 829, 708 cm<sup>-1</sup>; <sup>1</sup>H NMR (500 MHz, CDCl<sub>3</sub>):  $\delta$  8.06 (d,  $J$  = 8.0 Hz, 2H), 7.53 (t,  $J$  = 7.4 Hz, 1H), 7.42 (d,  $J$  = 7.8 Hz, 2H), 7.40 – 7.37 (m, 3H), 7.31 (dd,  $J$  = 12.2, 3.4 Hz, 2H), 7.24 (d,  $J$  = 1.0 Hz, 1H), 6.89 (d,  $J$  = 8.6 Hz, 2H), 5.47 (s, 1H), 5.23 (s, 1H), 3.79 (s, 3H); <sup>13</sup>C NMR (100 MHz, CDCl<sub>3</sub>):  $\delta$  165.8, 159.2, 159.0, 158.1, 149.3, 139.8, 136.1, 133.8, 132.7, 130.5, 129.9, 129.5, 128.4, 128.2, 127.5, 126.6, 113.8, 111.5, 55.2; MS (ESI):  $m/z$ : 355 [M+H]<sup>+</sup>; HRMS (ESI):  $m/z$ : calcd for C<sub>23</sub>H<sub>19</sub>O<sub>2</sub>N<sub>2</sub>: 355.14410 [M+H]<sup>+</sup>; found: 355.14339.

#### 4-((1-(2-Fluorophenyl)vinyl)oxy)-2-phenylquinazoline (4).

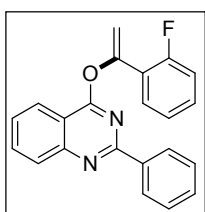

Yield: 82% (140 mg); colorless solid; mp: 129–130 °C; IR (neat):  $\nu_{\max}$  = 3066, 2919, 2850, 1730, 1621, 1575, 1558, 1489, 1455, 1253, 1159, 762, 709 cm<sup>-1</sup>; <sup>1</sup>H NMR (600 MHz, DMSO-*d*<sub>6</sub>):  $\delta$  8.40 (d,  $J$  = 7.9 Hz, 1H), 8.23 (d,  $J$  = 6.7 Hz, 2H), 8.06 – 8.02 (m, 2H), 7.78 – 7.76 (m, 1H), 7.63 – 7.61 (m, 1H), 7.51 – 7.45 (m, 3H), 7.39 – 7.36 (m, 1H), 7.28 (dd,  $J$  = 11.5, 8.4 Hz, 1H), 7.20 (t,  $J$  = 7.6 Hz, 1H), 5.72 (s, 1H), 5.61 (d,  $J$  = 1.2 Hz, 1H); <sup>13</sup>C NMR (150 MHz, DMSO-*d*<sub>6</sub>):  $\delta$  165.4, 159.9, 158.5, 158.3, 151.7, 149.2, 136.7, 134.9, 131.0, 130.8 (d,  $J$  = 8.6 Hz), 128.6, 128.4 (d,  $J$  = 2.0 Hz), 127.8, 127.8, 124.7, 123.4, 122.6 (d,  $J$  = 11.5 Hz), 116.3 (d,  $J$  = 22.1 Hz), 114.1, 107.4 (d,  $J$  = 6.3 Hz); MS (ESI):  $m/z$ : 343 [M+H]<sup>+</sup>; HRMS (ESI):  $m/z$ : calcd for C<sub>22</sub>H<sub>16</sub>FN<sub>2</sub>O: 343.12412 [M+H]<sup>+</sup>; found: 343.12311.

#### 2-Phenyl-4-((1-(*m*-tolyl)vinyl)oxy)quinazoline (5).

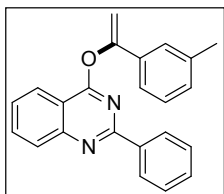

Yield: 85% (143 mg); white solid; mp: 161–163 °C; IR (neat):  $\nu_{\max}$  = 2918, 2850, 1726, 1622, 1575, 1557, 1461, 1384, 1349, 1269, 785, 768, 706  $\text{cm}^{-1}$ ;  $^1\text{H}$  NMR (400 MHz,  $\text{CDCl}_3$ ):  $\delta$  8.39 (dd,  $J$  = 8.2, 0.8 Hz, 1H), 8.32 (dd,  $J$  = 6.7, 3.0 Hz, 2H), 8.03 (d,  $J$  = 8.4 Hz, 1H), 7.90 – 7.85 (m, 1H), 7.63 – 7.59 (m, 1H), 7.43 – 7.39 (m, 4H), 7.20 (t,  $J$  = 7.6 Hz, 1H), 7.10 (d,  $J$  = 8.4 Hz, 2H), 5.58 (d,  $J$  = 2.0 Hz, 1H), 5.25 (d,  $J$  = 2.0 Hz, 1H), 2.32 (s, 3H);  $^{13}\text{C}$  NMR (100 MHz,  $\text{CDCl}_3$ ):  $\delta$  166.2, 160.0, 155.5, 152.5, 138.0, 137.7, 135.1, 133.8, 130.4, 129.5, 128.5, 128.3, 128.2, 128.1, 126.7, 126.0, 123.4, 122.5, 114.9, 101.8, 22.6; MS (ESI):  $m/z$ : 339  $[\text{M}+\text{H}]^+$ ; HRMS (ESI):  $m/z$ : calcd for  $\text{C}_{23}\text{H}_{19}\text{N}_2\text{O}$ : 339.14919  $[\text{M}+\text{H}]^+$ ; found: 339.14843.

#### 4-((1-(4-Fluorophenyl)vinyl)oxy)-2-phenylquinazoline (6).

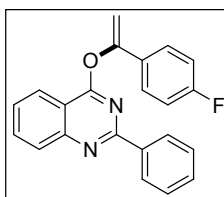

Yield: 92% (157 mg); pale yellow solid; mp: 178–180 °C; IR (neat):  $\nu_{\max}$  = 3065, 2923, 2853, 1718, 1600, 1575, 1507, 1449, 1261, 837, 770, 710  $\text{cm}^{-1}$ ;  $^1\text{H}$  NMR (500 MHz,  $\text{CDCl}_3$ ):  $\delta$  8.36 (d,  $J$  = 8.1 Hz, 1H), 8.32 (d,  $J$  = 3.8 Hz, 2H), 8.03 (d,  $J$  = 8.4 Hz, 1H), 7.88 – 7.85 (m, 1H), 7.61 – 7.56 (m, 2H), 7.41 (dd,  $J$  = 7.1, 5.2 Hz, 2H), 7.06 – 7.02 (m, 2H), 6.99 – 6.96 (m, 2H), 5.54 (d,  $J$  = 1.9 Hz, 1H), 5.26 (d,  $J$  = 1.9 Hz, 1H);  $^{13}\text{C}$  NMR (100 MHz,  $\text{CDCl}_3$ ):  $\delta$  166.0, 164.1, 159.9, 154.4, 152.5, 137.6, 133.9, 130.5, 129.3, 128.4, 128.3, 127.2, 127.1, 126.8, 123.3, 115.4 (d,  $J$  = 21.8 Hz), 114.8, 101.8; MS (ESI):  $m/z$ : 343  $[\text{M}+\text{H}]^+$ ; HRMS (ESI):  $m/z$ : calcd for  $\text{C}_{22}\text{H}_{16}\text{FN}_2\text{O}$ : 343.12412  $[\text{M}+\text{H}]^+$ ; found: 343.12447.

#### 4-((1-(4-Chlorophenyl)vinyl)oxy)-2-phenylquinazoline (7).

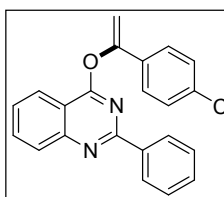

Yield: 89% (159 mg); pale yellow solid; mp: 200–202 °C; IR (neat):  $\nu_{\max}$  = 2922, 2852, 1690, 1623, 1575, 1556, 1490, 1460, 1259, 1214, 1092, 829, 754, 668  $\text{cm}^{-1}$ ;  $^1\text{H}$  NMR (400 MHz,  $\text{CDCl}_3$ ):  $\delta$  8.36 (d,  $J$  = 8.1 Hz, 1H), 8.31 (d,  $J$  = 4.7 Hz, 2H), 8.03 (d,  $J$  = 8.6 Hz, 1H), 7.89 – 7.83 (m, 2H), 7.60 (t,  $J$  = 7.5 Hz, 1H), 7.53 (d,  $J$  = 8.5 Hz, 2H), 7.43 – 7.39 (m, 2H), 7.28 (d,  $J$  = 8.5 Hz, 2H), 5.59 (d,  $J$  =

1.8 Hz, 1H), 5.30 (d,  $J = 1.8$  Hz, 1H);  $^{13}\text{C}$  NMR (125 MHz,  $\text{CDCl}_3$ ):  $\delta$  166.0, 159.9, 154.2, 152.5, 137.5, 134.5, 133.9, 133.6, 130.5, 128.7, 128.3, 128.3, 127.8, 126.8, 126.5, 123.2, 114.7, 102.5; MS (ESI):  $m/z$ : 359  $[\text{M}+\text{H}]^+$ ; HRMS (ESI):  $m/z$ : calcd for  $\text{C}_{22}\text{H}_{16}\text{ClN}_2\text{O}$ : 359.09457  $[\text{M}+\text{H}]^+$ ; found: 359.09500.

#### 4-((1-(4-Bromophenyl)vinyl)oxy)-2-phenylquinazoline (8).

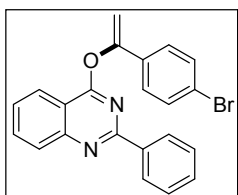

Yield: 87% (175 mg); yellow solid; mp: 138–140 °C; IR (neat):  $\nu_{\text{max}} =$  3019, 2923, 2853, 1688, 1623, 1575, 1557, 1487, 1262, 1214, 830, 748, 667  $\text{cm}^{-1}$ ;  $^1\text{H}$  NMR (500 MHz,  $\text{CDCl}_3$ ):  $\delta$  8.36 (d,  $J = 8.1$  Hz, 1H), 8.32 – 8.30 (m, 2H), 8.04 (d,  $J = 8.4$  Hz, 1H), 7.90 – 7.87 (m, 1H), 7.63 – 7.55 (m, 2H), 7.46 (d,  $J = 4.8$  Hz, 3H), 7.41 (dd,  $J = 5.4, 1.7$  Hz, 3H), 5.61 (d,  $J = 2.2$  Hz, 1H), 5.30 (d,  $J = 2.2$  Hz, 1H);  $^{13}\text{C}$  NMR (100 MHz,  $\text{CDCl}_3$ ):  $\delta$  166.0, 159.9, 154.3, 152.5, 137.5, 134.1, 134.0, 131.6, 130.5, 129.0, 128.4, 128.3, 128.2, 126.8, 123.2, 122.8, 114.7, 102.6; MS (ESI):  $m/z$ : 405  $[\text{M}+\text{H}]^+$ ; HRMS (ESI):  $m/z$ : calcd for  $\text{C}_{22}\text{H}_{16}\text{BrN}_2\text{O}$ : 403.04405  $[\text{M}+\text{H}]^+$ ; found: 403.04403.

#### 4-((1-([1,1'-Biphenyl]-4-yl)vinyl)oxy)-2-phenylquinazoline (9).

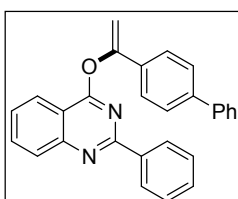

Yield: 73% (146 mg); white solid; mp: 139–141 °C; IR (neat):  $\nu_{\text{max}} =$  3056, 3028, 2923, 2853, 1680, 1603, 1551, 1517, 1486, 1447, 1267, 1218, 839, 765, 696  $\text{cm}^{-1}$ ;  $^1\text{H}$  NMR (500 MHz,  $\text{CDCl}_3$ ):  $\delta$  8.40 (d,  $J = 8.1$  Hz, 1H), 8.34 (dd,  $J = 5.8, 3.7$  Hz, 2H), 8.11 – 8.08 (m, 1H), 8.05 – 8.00 (m, 1H), 7.87 (t,  $J = 7.6$  Hz, 1H), 7.67 (dd,  $J = 8.3, 2.6$  Hz, 2H), 7.61 – 7.53 (m, 5H), 7.44 – 7.37 (m, 3H), 7.34 – 7.29 (m, 2H), 5.66 (d,  $J = 2.3$  Hz, 1H), 5.30 (d,  $J = 2.3$  Hz, 1H);  $^{13}\text{C}$  NMR (100 MHz,  $\text{CDCl}_3$ ):  $\delta$  166.1, 160.0, 154.9, 152.5, 141.4, 140.6, 137.6, 133.8, 130.4, 129.6, 128.7, 128.4, 128.1, 127.2, 127.1, 127.0, 126.9, 126.5, 125.6, 123.3, 114.8, 101.9; MS (ESI):  $m/z$ : 401  $[\text{M}+\text{H}]^+$ ; HRMS (ESI):  $m/z$ : calcd for  $\text{C}_{28}\text{H}_{21}\text{N}_2\text{O}$ : 401.16484  $[\text{M}+\text{H}]^+$ ; found: 401.16440.

#### 4-((1-(Naphthalen-2-yl)vinyl)oxy)-2-phenylquinazoline (10).

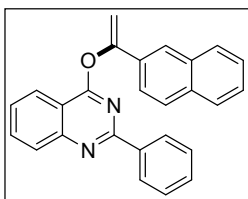

Yield: 69% (129 mg); yellow solid; mp: 135–137 °C; IR (neat):  $\nu_{\max}$  = 3056, 2924, 2853, 1716, 1678, 1623, 1599, 1573, 1488, 1449, 1270, 817, 772, 709  $\text{cm}^{-1}$ ;  $^1\text{H}$  NMR (500 MHz,  $\text{CDCl}_3$ ):  $\delta$  8.45 (d,  $J$  = 7.9 Hz, 1H), 8.30 (dd,  $J$  = 3.3, 1.8 Hz, 2H), 8.11 (d,  $J$  = 6.7 Hz, 1H), 8.05 – 8.01 (m, 2H), 7.89 – 7.75 (m, 4H), 7.63 – 7.58 (m, 1H), 7.46 – 7.40 (m, 2H), 7.34 (d,  $J$  = 5.5 Hz, 2H), 7.21 (s, 1H), 5.75 (s, 1H), 5.37 (s, 1H);  $^{13}\text{C}$  NMR (100 MHz,  $\text{CDCl}_3$ ):  $\delta$  166.2, 160.0, 155.2, 152.5, 137.6, 133.9, 130.4, 129.6, 128.4, 128.3, 128.2, 127.7, 127.5, 126.8, 126.3, 126.1, 126.0, 124.9, 124.3, 124.0, 123.4, 123.1, 114.9, 102.4; MS (ESI):  $m/z$ : 375  $[\text{M}+\text{H}]^+$ ; HRMS (ESI):  $m/z$ : calcd for  $\text{C}_{26}\text{H}_{19}\text{ON}_2$ : 375.14919  $[\text{M}+\text{H}]^+$ ; found: 375.14935.

#### 4-((1-(2,4-Dichlorophenyl)vinyl)oxy)-2-phenylquinazoline (11).

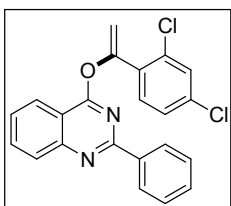

Yield: 82% (161 mg); yellow solid; mp: 155–156 °C; IR (neat):  $\nu_{\max}$  = 3066, 2923, 2852, 1723, 1621, 1575, 1559, 1489, 1271, 822, 771, 708, 680  $\text{cm}^{-1}$ ;  $^1\text{H}$  NMR (500 MHz,  $\text{CDCl}_3$ ):  $\delta$  8.50 (dd,  $J$  = 5.6, 1.7 Hz, 1H), 8.37 (dd,  $J$  = 3.4, 1.8 Hz, 1H), 7.99 (d,  $J$  = 8.4 Hz, 1H), 7.85 – 7.80 (m, 1H), 7.63 (d,  $J$  = 8.4 Hz, 1H), 7.58 – 7.52 (m, 2H), 7.48 – 7.42 (m, 2H), 7.36 (dd,  $J$  = 6.7, 2.1 Hz, 1H), 7.25 – 7.17 (m, 2H), 5.57 (d,  $J$  = 1.5 Hz, 1H), 5.46 (d,  $J$  = 1.5 Hz, 1H);  $^{13}\text{C}$  NMR (100 MHz,  $\text{CDCl}_3$ ):  $\delta$  165.3, 159.7, 152.4, 151.8, 134.8, 133.9, 133.1, 130.5, 129.6, 128.4, 128.2, 128.0, 127.6, 127.4, 127.2, 126.9, 126.4, 123.5, 115.1, 107.4; MS (ESI):  $m/z$ : 393  $[\text{M}+\text{H}]^+$ ; HRMS (ESI):  $m/z$ : calcd for  $\text{C}_{22}\text{H}_{15}\text{Cl}_2\text{N}_2\text{O}$ : 393.0556  $[\text{M}+\text{H}]^+$ ; found: 393.0547.

#### 4-((1-(3,5-Difluorophenyl)vinyl)oxy)-2-phenylquinazoline (12).

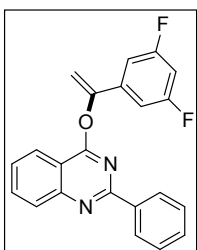

Yield: 89% (160 mg); light yellow solid; mp: 140–142 °C; IR (neat):  $\nu_{\max}$  = 3067, 2923, 2852, 1740, 1621, 1589, 1557, 1488, 1384, 1347, 1317, 1263, 1211, 1118, 987, 860, 771, 706  $\text{cm}^{-1}$ ;  $^1\text{H}$  NMR (500 MHz,  $\text{CDCl}_3$ ):  $\delta$  8.35 (d,  $J$  = 8.4 Hz, 1H), 8.32 (dd,  $J$  = 6.5, 2.8 Hz, 2H), 8.18 (d,  $J$  = 7.5 Hz, 1H), 8.05 (d,  $J$  = 8.4 Hz, 1H), 7.90 (t,  $J$  = 7.6 Hz, 1H), 7.63 (dd,  $J$  = 14.4, 7.0 Hz, 1H), 7.52 (t,  $J$  =



7.7 Hz, 1H), 7.43 (d,  $J = 2.2$  Hz, 1H), 7.12 (d,  $J = 6.4$  Hz, 2H), 6.79 – 6.72 (m, 1H), 5.65 (d,  $J = 2.1$  Hz, 1H), 5.38 (d,  $J = 2.1$  Hz, 1H);  $^{13}\text{C}$  NMR (100 MHz,  $\text{CDCl}_3$ ):  $\delta$  165.8, 164.3 (d,  $J = 12.8$  Hz), 161.8 (d,  $J = 13.0$  Hz), 159.8, 152.6, 137.4, 134.1, 130.6, 130.1, 128.7, 128.3, 128.2, 127.0, 123.2, 114.6, 108.4 (d,  $J = 7.5$  Hz), 108.1, 104.1; MS (ESI):  $m/z$ : 361  $[\text{M}+\text{H}]^+$ ; HRMS (ESI):  $m/z$ : calcd for  $\text{C}_{22}\text{H}_{15}\text{F}_2\text{N}_2\text{O}$ : 361.1147  $[\text{M}+\text{H}]^+$ ; found: 361.1141.

### 2-Phenyl-4-((1-(4-(trifluoromethyl)phenyl)vinyl)oxy)quinazoline (13).

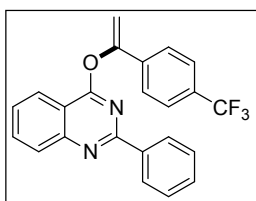

Yield: 78% (153 mg); white solid; mp: 173–175 °C; IR (neat):  $\nu_{\text{max}} = 3066, 2923, 2852, 1739, 1621, 1576, 1489, 1265, 770, 708 \text{ cm}^{-1}$ ;  $^1\text{H}$  NMR (500 MHz,  $\text{CDCl}_3$ ):  $\delta$  8.37 (d,  $J = 8.0$  Hz, 1H), 8.27 (d,  $J = 7.9$  Hz, 2H), 8.04 (d,  $J = 8.3$  Hz, 2H), 7.90 – 7.87 (m, 1H), 7.71 (d,  $J = 8.3$  Hz, 2H), 7.63 – 7.60 (m, 1H), 7.58 (d,  $J = 8.4$  Hz, 2H), 7.39 (d,  $J = 6.6$  Hz, 2H), 5.70 (d,  $J = 2.2$  Hz, 1H), 5.40 (d,  $J = 2.2$  Hz, 1H);  $^{13}\text{C}$  NMR (125 MHz,  $\text{CDCl}_3$ ):  $\delta$  165.9, 159.8, 154.0, 152.5, 138.6, 137.4, 134.1, 130.6, 130.1, 128.7, 128.5, 128.3, 128.3, 128.2, 126.9, 125.5, 123.2, 114.7, 104.1; MS (ESI):  $m/z$ : 393  $[\text{M}+\text{H}]^+$ ; HRMS (ESI):  $m/z$ : calcd for  $\text{C}_{23}\text{H}_{16}\text{ON}_2\text{F}_3$ : 393.12092  $[\text{M}+\text{H}]^+$ ; found: 393.12127.

### 4-((1-(4-Nitrophenyl)vinyl)oxy)-2-phenylquinazoline (14).

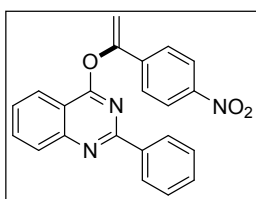

Yield: 68% (125 mg); yellow solid; mp: 152–153 °C; IR (neat):  $\nu_{\text{max}} = 2922, 2852, 1726, 1594, 1518, 1343, 1219, 970, 854, 772, 686 \text{ cm}^{-1}$ ;  $^1\text{H}$  NMR (400 MHz,  $\text{CDCl}_3$ ):  $\delta$  8.22 – 8.17 (m, 2H), 8.14 (d,  $J = 8.9$  Hz, 1H), 7.61 (d,  $J = 8.8$  Hz, 1H), 7.50 (t,  $J = 9.2$  Hz, 2H), 7.45 (d,  $J = 8.1$  Hz, 1H), 7.34 (d,  $J = 8.7$  Hz, 1H), 7.23 – 7.18 (m, 4H), 7.09 (dd,  $J = 12.2, 4.1$  Hz, 1H), 5.60 (s, 1H), 5.53 (s, 1H);  $^{13}\text{C}$  NMR (100 MHz,  $\text{CDCl}_3$ ):  $\delta$  166.8, 155.3, 151.9, 148.2, 144.0, 138.2, 137.2, 133.2, 131.0, 129.5, 129.1, 128.9, 128.6, 127.9, 126.9, 123.4, 116.5, 102.7; MS (ESI):  $m/z$ : 370  $[\text{M}+\text{H}]^+$ ; HRMS (ESI):  $m/z$ : calcd for  $\text{C}_{22}\text{H}_{16}\text{N}_3\text{O}_3$ : 370.11862  $[\text{M}+\text{H}]^+$ ; found: 370.11768.

### 2-Phenyl-4-((4-phenylbut-1-en-2-yl)oxy)quinazoline (15).

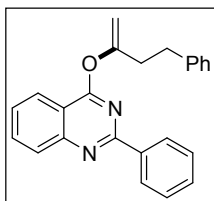

Yield: 71% (125 mg); white solid; mp: 182–183 °C; IR (neat):  $\nu_{\max}$  = 3063, 3026, 2922, 2853, 1735, 1621, 1574, 1558, 1492, 1216, 754, 700  $\text{cm}^{-1}$ ;  $^1\text{H}$  NMR (300 MHz,  $\text{CDCl}_3$ ):  $\delta$  8.54 (dd,  $J$  = 6.9, 2.9 Hz, 2H), 8.20 – 8.14 (m, 1H), 8.05 – 7.97 (m, 1H), 7.85 – 7.80 (m, 1H), 7.58 – 7.52 (m, 1H), 7.50 (dd,  $J$  = 4.9, 1.4 Hz, 3H), 7.27 (dd,  $J$  = 2.7, 1.4 Hz, 2H), 7.24 – 7.17 (m, 3H), 5.03 (d,  $J$  = 1.5 Hz, 1H), 4.95 (d,  $J$  = 0.6 Hz, 1H), 2.88 – 2.79 (m, 2H), 2.77 – 2.69 (m, 2H);  $^{13}\text{C}$  NMR (100 MHz,  $\text{CDCl}_3$ ):  $\delta$  166.4, 160.0, 157.5, 151.9, 141.6, 138.2, 133.3, 132.7, 130.3, 129.4, 128.3, 128.2, 127.9, 126.1, 125.8, 123.5, 115.5, 101.6, 37.8, 31.9; MS (ESI):  $m/z$ : 353  $[\text{M}+\text{H}]^+$ ; HRMS (ESI):  $m/z$ : calcd for  $\text{C}_{24}\text{H}_{21}\text{N}_2\text{O}$ : 353.16484  $[\text{M}+\text{H}]^+$ ; found: 353.16525.

#### 4-(Pent-1-en-2-yloxy)-2-phenylquinazoline (16).

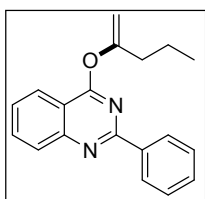

Yield: 68% (98 mg); pale yellow solid; mp: 191–192 °C; IR (neat):  $\nu_{\max}$  = 3065, 2959, 2929, 1717, 1620, 1572, 1558, 1491, 1445, 1219, 771, 708, 681  $\text{cm}^{-1}$ ;  $^1\text{H}$  NMR (500 MHz,  $\text{CDCl}_3$ ):  $\delta$  8.57 (dd,  $J$  = 7.2, 1.1 Hz, 2H), 8.17 (dd,  $J$  = 8.1, 0.6 Hz, 1H), 8.04 (d,  $J$  = 7.4 Hz, 1H), 7.98 (d,  $J$  = 8.4 Hz, 1H), 7.82 – 7.78 (m, 1H), 7.54 – 7.48 (m, 2H), 7.43 (t,  $J$  = 7.7 Hz, 1H), 5.01 (s, 1H), 4.93 (s, 1H), 2.56 (t,  $J$  = 7.5 Hz, 2H), 1.78 – 1.71 (m, 2H), 0.99 (t,  $J$  = 7.4 Hz, 3H);  $^{13}\text{C}$  NMR (100 MHz,  $\text{CDCl}_3$ ):  $\delta$  166.5, 160.0, 151.8, 138.3, 133.2, 130.3, 129.4, 128.4, 128.2, 127.8, 126.1, 123.5, 115.6, 100.9, 38.2, 19.8, 14.0; MS (ESI):  $m/z$ : 291  $[\text{M}+\text{H}]^+$ ; HRMS (ESI):  $m/z$ : calcd for  $\text{C}_{19}\text{H}_{19}\text{N}_2\text{O}$ : 291.14919  $[\text{M}+\text{H}]^+$ ; found: 291.14825.

#### 4-(Cyclohex-1-en-1-yloxy)-2-phenylquinazoline (17).

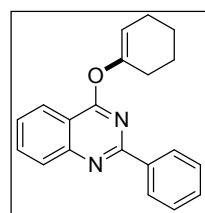

Yield: 66% (99 mg); white solid; mp: 199–201 °C; IR (neat):  $\nu_{\max}$  = 3064, 3028, 2924, 2853, 1715, 1619, 1572, 1557, 1490, 1448, 1416, 1274, 769, 709, 683  $\text{cm}^{-1}$ ;  $^1\text{H}$  NMR (400 MHz,  $\text{CDCl}_3$ ):  $\delta$  8.56 (dd,  $J$  = 7.9, 1.8 Hz, 2H), 8.18 (dd,  $J$  = 8.2, 0.9 Hz, 1H), 8.05 (dd,  $J$  = 8.3, 1.3 Hz, 1H), 7.97 (d,  $J$  = 8.4 Hz, 1H), 7.82 – 7.77 (m, 1H), 7.52 – 7.48 (m, 2H), 7.45 – 7.40 (m, 1H), 5.62 – 5.56 (m, 1H), 2.42 –

2.38 (m, 2H), 2.36 – 2.32 (m, 2H), 1.93 – 1.85 (m, 2H), 1.82 – 1.73 (m, 2H);  $^{13}\text{C}$  NMR (125 MHz,  $\text{CDCl}_3$ ):  $\delta$  166.2, 160.1, 151.9, 138.3, 133.2, 132.6, 130.3, 129.5, 128.3, 128.2, 127.8, 126.1, 123.6, 115.7, 31.4, 29.6, 25.6, 23.7; MS (ESI):  $m/z$ : 303  $[\text{M}+\text{H}]^+$ ; HRMS (ESI):  $m/z$ : calcd for  $\text{C}_{20}\text{H}_{19}\text{N}_2\text{O}$ : 303.14919  $[\text{M}+\text{H}]^+$ ; found: 303.14864.

#### 4-((1-Phenylvinyl)oxy)-2-(*p*-tolyl)quinazoline (18).

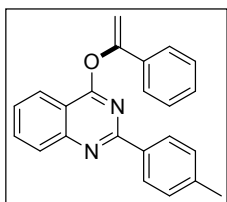

Yield: 82% (138 mg); light yellow solid; mp: 173–175 °C; IR (neat):  $\nu_{\text{max}}$  = 3060, 3028, 2922, 2853, 1612, 1574, 1554, 1489, 1453, 1384, 1260, 766, 695  $\text{cm}^{-1}$ ;  $^1\text{H}$  NMR (400 MHz,  $\text{CDCl}_3$ ):  $\delta$  8.37 (d,  $J$  = 8.1 Hz, 1H), 8.19 (d,  $J$  = 8.1 Hz, 2H), 8.00 (d,  $J$  = 8.4 Hz, 1H), 7.87 – 7.83 (m, 1H), 7.61 – 7.56 (m, 3H), 7.33 – 7.27 (m, 3H), 7.19 (d,  $J$  = 8.0 Hz, 2H), 5.60 (d,  $J$  = 1.9 Hz, 1H), 5.28 (d,  $J$  = 1.9 Hz, 1H), 2.36 (s, 3H);  $^{13}\text{C}$  NMR (125 MHz,  $\text{CDCl}_3$ ):  $\delta$  166.0, 160.1, 155.3, 152.5, 140.6, 135.1, 133.7, 129.0, 128.6, 128.4, 128.0, 127.7, 126.5, 126.2, 125.3, 123.3, 114.8, 101.8, 21.4; MS (ESI):  $m/z$ : 339  $[\text{M}+\text{H}]^+$ ; HRMS (ESI):  $m/z$ : calcd for  $\text{C}_{23}\text{H}_{19}\text{ON}_2$ : 339.14919  $[\text{M}+\text{H}]^+$ ; found: 339.14882.

#### 2-(4-Isopropylphenyl)-4-((1-phenylvinyl)oxy)quinazoline (19).

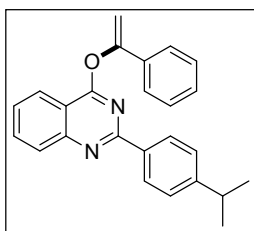

Yield: 86% (157 mg); white solid; mp: 175–177 °C; IR (neat):  $\nu_{\text{max}}$  = 3062, 2959, 2922, 2852, 1605, 1575, 1555, 1489, 1453, 1384, 1347, 1261, 772, 698  $\text{cm}^{-1}$ ;  $^1\text{H}$  NMR (400 MHz,  $\text{CDCl}_3$ ):  $\delta$  8.36 (d,  $J$  = 8.1 Hz, 1H), 8.23 (dd,  $J$  = 8.0, 3.8 Hz, 2H), 8.01 (d,  $J$  = 8.3 Hz, 1H), 7.82 (t,  $J$  = 7.7 Hz, 1H), 7.60 (d,  $J$  = 7.3 Hz, 2H), 7.55 (t,  $J$  = 7.6 Hz, 1H), 7.30 – 7.23 (m, 4H), 7.20 – 7.11 (m, 1H), 5.59 (d,  $J$  = 2.0 Hz, 1H), 5.27 (d,  $J$  = 2.0 Hz, 1H), 2.96 – 2.86 (m, 1H), 1.24 (dd,  $J$  = 6.9, 2.2 Hz, 6H);  $^{13}\text{C}$  NMR (125 MHz,  $\text{CDCl}_3$ ):  $\delta$  166.0, 160.1, 155.2, 152.5, 151.5, 135.4, 135.1, 133.7, 128.6, 128.5, 128.4, 128.0, 127.0, 126.3, 125.2, 123.3, 114.7, 101.8, 34.0, 23.8; MS (ESI):  $m/z$ : 367  $[\text{M}+\text{H}]^+$ ; HRMS (ESI):  $m/z$ : calcd for  $\text{C}_{25}\text{H}_{23}\text{N}_2\text{O}$ : 367.18049  $[\text{M}+\text{H}]^+$ ; found: 367.17921.

### 2-(4-Methoxyphenyl)-4-((1-phenylvinyl)oxy)quinazoline (20).

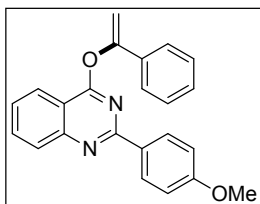

Yield: 86% (152 mg); light brown solid; mp: 177–178 °C; IR (neat):  $\nu_{\max}$  = 3019, 2925, 1605, 1572, 1552, 1515, 1452, 1349, 1215, 907, 748, 667  $\text{cm}^{-1}$ ;  $^1\text{H}$  NMR (400 MHz,  $\text{CDCl}_3$ ):  $\delta$  8.36 (dd,  $J$  = 8.1, 0.7 Hz, 1H), 8.26 (d,  $J$  = 8.9 Hz, 2H), 7.99 (d,  $J$  = 8.4 Hz, 1H), 7.87 – 7.83 (m, 1H), 7.61 – 7.55 (m, 3H), 7.34 – 7.28 (m, 3H), 6.90 (d,  $J$  = 8.9 Hz, 2H), 5.60 (d,  $J$  = 2.0 Hz, 1H), 5.28 (d,  $J$  = 2.0 Hz, 1H), 3.84 (s, 3H);  $^{13}\text{C}$  NMR (100 MHz,  $\text{CDCl}_3$ ):  $\delta$  166.0, 161.7, 159.8, 155.3, 135.1, 133.8, 130.1, 129.1, 128.7, 128.4, 127.8, 127.5, 126.3, 125.2, 123.4, 114.6, 113.6, 101.9, 55.3; MS (ESI):  $m/z$ : 355  $[\text{M}+\text{H}]^+$ ; HRMS (ESI):  $m/z$ : calcd for  $\text{C}_{23}\text{H}_{19}\text{O}_2\text{N}_2$ : 355.14410  $[\text{M}+\text{H}]^+$ ; found: 355.14349.

### 2-(3-Methoxyphenyl)-4-((1-phenylvinyl)oxy)quinazoline (21).

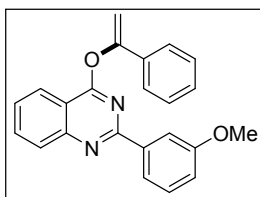

Yield: 80% (141 mg); yellow solid; mp: 178–180 °C; IR (neat):  $\nu_{\max}$  = 3063, 3001, 2929, 2836, 1599, 1575, 1559, 1491, 1457, 1345, 1256, 768, 689  $\text{cm}^{-1}$ ;  $^1\text{H}$  NMR (400 MHz,  $\text{CDCl}_3$ ):  $\delta$  8.38 (dd,  $J$  = 8.1, 0.8 Hz, 1H), 8.02 (t,  $J$  = 7.0 Hz, 1H), 7.94 (dd,  $J$  = 7.6, 1.1 Hz, 1H), 7.84 – 7.82 (m, 1H), 7.61 – 7.57 (m, 2H), 7.42 (d,  $J$  = 7.2 Hz, 2H), 7.38 (d,  $J$  = 1.8 Hz, 1H), 7.31 – 7.27 (m, 2H), 7.16 – 7.14 (m, 1H), 6.97 – 6.94 (m, 1H), 5.60 (d,  $J$  = 2.0 Hz, 1H), 5.28 (d,  $J$  = 2.0 Hz, 1H), 3.83 (s, 3H);  $^{13}\text{C}$  NMR (100 MHz,  $\text{CDCl}_3$ ):  $\delta$  166.0, 159.6, 155.3, 152.4, 144.7, 133.8, 129.9, 129.2, 128.6, 128.4, 128.1, 126.8, 126.3, 125.9, 125.1, 123.3, 120.9, 117.2, 112.7, 101.9, 55.2; MS (ESI):  $m/z$ : 355  $[\text{M}+\text{H}]^+$ ; HRMS (ESI):  $m/z$ : calcd for  $\text{C}_{23}\text{H}_{19}\text{N}_2\text{O}_2$ : 355.14410  $[\text{M}+\text{H}]^+$ ; found: 355.14291.

### 2-(4-Fluorophenyl)-4-((1-phenylvinyl)oxy)quinazoline (22).

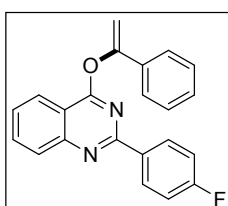

Yield: 79% (135 mg); pale yellow solid; mp: 141–143 °C; IR (neat):  $\nu_{\max}$  = 2924, 2853, 1720, 1602, 1573, 1510, 1492, 1268, 1151, 1109, 909, 767, 696  $\text{cm}^{-1}$ ;  $^1\text{H}$  NMR (400 MHz,  $\text{CDCl}_3$ ):  $\delta$  8.38 (dd,  $J$  = 8.1, 0.6 Hz,

1H), 8.29 (dd,  $J = 8.8, 5.7$  Hz, 2H), 8.01 (d,  $J = 8.4$  Hz, 1H), 7.90 – 7.85 (m, 1H), 7.62 – 7.58 (m, 3H), 7.34 – 7.28 (m, 2H), 7.18 (dd,  $J = 7.2, 4.7$  Hz, 1H), 7.06 (t,  $J = 8.7$  Hz, 2H), 5.61 (d,  $J = 2.0$  Hz, 1H), 5.27 (d,  $J = 2.0$  Hz, 1H);  $^{13}\text{C}$  NMR (100 MHz,  $\text{CDCl}_3$ ):  $\delta$  166.1, 163.3, 159.0, 155.3, 152.4, 135.0, 134.0, 130.5 (d,  $J = 8.6$  Hz), 129.1, 128.7, 128.4, 128.0, 126.8, 126.2, 125.2, 123.4, 115.19 (d,  $J = 21.6$  Hz), 101.9; MS (ESI):  $m/z$ : 343  $[\text{M}+\text{H}]^+$ ; HRMS (ESI):  $m/z$ : calcd for  $\text{C}_{22}\text{H}_{16}\text{FN}_2\text{O}$ : 343.12412  $[\text{M}+\text{H}]^+$ ; found: 343.12450.

### 2-(4-Chlorophenyl)-4-((1-phenylvinyl)oxy)quinazoline (23).

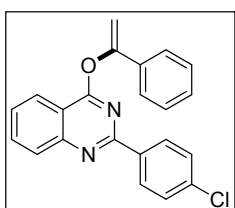

Yield: 77% (138 mg); pale yellow solid; mp: 135–136 °C; IR (neat):  $\nu_{\text{max}}$  = 2923, 2852, 1621, 1574, 1555, 1494, 1453, 1261, 1091, 945, 770, 698  $\text{cm}^{-1}$ ;  $^1\text{H}$  NMR (500 MHz,  $\text{CDCl}_3$ ):  $\delta$  8.39 (d,  $J = 8.1$  Hz, 1H), 8.23 (d,  $J = 8.5$  Hz, 2H), 8.01 (d,  $J = 8.4$  Hz, 1H), 7.91 – 7.86 (m, 1H), 7.64 – 7.58 (m, 3H), 7.35 (d,  $J = 8.4$  Hz, 2H), 7.32 – 7.27 (m, 2H), 7.23 – 7.17 (m, 1H), 5.61 (d,  $J = 1.5$  Hz, 1H), 5.27 (d,  $J = 1.5$  Hz, 1H);  $^{13}\text{C}$  NMR (100 MHz,  $\text{CDCl}_3$ ):  $\delta$  166.1, 158.9, 155.2, 152.4, 136.6, 136.2, 134.0, 129.7, 129.1, 128.7, 128.4, 128.1, 126.9, 126.2, 125.2, 123.4, 114.8, 101.9; MS (ESI):  $m/z$ : 359  $[\text{M}+\text{H}]^+$ ; HRMS (ESI):  $m/z$ : calcd for  $\text{C}_{22}\text{H}_{16}\text{ClN}_2\text{O}$ : 359.09457  $[\text{M}+\text{H}]^+$ ; found: 359.09517.

### 2-(4-Bromophenyl)-4-((1-phenylvinyl)oxy)quinazoline (24).

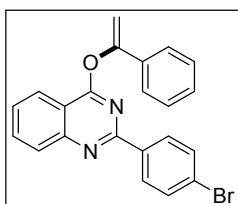

Yield: 74% (149 mg); yellow solid; mp: 125–127 °C; IR (neat):  $\nu_{\text{max}}$  = 3058, 3028, 2923, 2853, 1620, 1574, 1554, 1491, 1451, 1260, 768, 698  $\text{cm}^{-1}$ ;  $^1\text{H}$  NMR (400 MHz,  $\text{CDCl}_3$ ):  $\delta$  8.38 (d,  $J = 8.1$  Hz, 1H), 8.16 (d,  $J = 8.5$  Hz, 2H), 8.01 (d,  $J = 8.4$  Hz, 1H), 7.90 – 7.85 (m, 1H), 7.63 – 7.55 (m, 3H), 7.51 (d,  $J = 8.6$  Hz, 1H), 7.38 – 7.28 (m, 3H), 7.21 – 7.16 (m, 1H), 5.60 (d,  $J = 2.0$  Hz, 1H), 5.27 (d,  $J = 2.0$  Hz, 1H);  $^{13}\text{C}$  NMR (125 MHz,  $\text{CDCl}_3$ ):  $\delta$  166.1, 159.0, 155.2, 152.4, 136.6, 135.0, 134.0, 131.4, 130.0, 128.7, 128.4, 128.2, 128.1, 127.0, 125.2, 123.4, 114.9, 102.0; MS (ESI):  $m/z$ :

405 [M+H]<sup>+</sup> ; HRMS (ESI): *m/z*: calcd for C<sub>22</sub>H<sub>16</sub>BrN<sub>2</sub>O: 403.04405 [M+H]<sup>+</sup> ; found: 403.04432.

### 2-(4-Nitrophenyl)-4-((1-phenylvinyl)oxy)quinazoline (25).

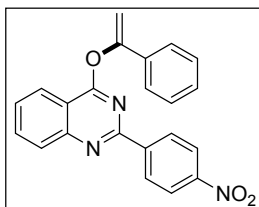

Yield: 77% (142 mg); white solid; mp: 179–180 °C; IR (neat):  $\nu_{\max}$  = 2921, 2852, 1727, 1593, 1517, 1343, 1219, 1109, 970, 854, 772, 687 cm<sup>-1</sup>; <sup>1</sup>H NMR (400 MHz, CDCl<sub>3</sub>):  $\delta$  8.44 (d, *J* = 8.9 Hz, 2H), 8.22 (d, *J* = 8.9 Hz, 1H), 8.06 (d, *J* = 8.4 Hz, 1H), 7.97 – 7.94 (m, 2H), 7.70 (t, *J* = 7.6 Hz, 1H), 7.61 – 7.55 (m, 2H), 7.46 (t, *J* = 7.6 Hz, 2H), 7.36 – 7.31 (m, 2H), 5.63 (d, *J* = 2.0 Hz, 1H), 5.29 (d, *J* = 2.0 Hz, 1H); <sup>13</sup>C NMR (125 MHz, CDCl<sub>3</sub>):  $\delta$  166.3, 157.7, 155.2, 152.3, 149.0, 143.5, 134.3, 133.0, 129.1, 128.9, 128.5, 128.4, 128.2, 127.8, 125.2, 123.4, 115.1, 102.1; MS (ESI): *m/z*: 370 [M+H]<sup>+</sup> ; HRMS (ESI): *m/z*: calcd for C<sub>22</sub>H<sub>16</sub>N<sub>3</sub>O<sub>3</sub>: 370.11862 [M+H]<sup>+</sup> ; found: 370.11743.

### 4-((1-Phenylvinyl)oxy)-2-(thiophen-2-yl)quinazoline (26).

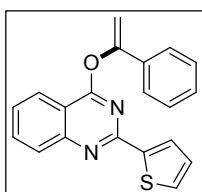

Yield: 67% (110 mg); light yellow solid; mp: 165–166 °C; IR (neat):  $\nu_{\max}$  = 3055, 3025, 2922, 2852, 1620, 1598, 1575, 1491, 1444, 1384, 1313, 1263, 1219, 1026, 896, 771, 698 cm<sup>-1</sup>; <sup>1</sup>H NMR (500 MHz, CDCl<sub>3</sub>):  $\delta$  7.94 (dd, *J* = 7.4, 1.0 Hz, 2H), 7.58 – 7.51 (m, 1H), 7.45 – 7.40 (m, 2H), 7.36 – 7.33 (m, 2H), 7.30 – 7.23 (m, 2H), 7.20 – 7.12 (m, 2H), 7.08 (dd, *J* = 5.9, 2.7 Hz, 1H), 5.57 (d, *J* = 2.0 Hz, 1H), 5.28 (d, *J* = 2.0 Hz, 1H); <sup>13</sup>C NMR (100 MHz, CDCl<sub>3</sub>):  $\delta$  165.8, 155.2, 152.3, 149.8, 146.3, 132.9, 129.3, 129.0, 128.4, 128.2, 127.7, 127.0, 126.1, 125.2, 123.3, 116.2, 114.1, 101.9; MS (ESI): *m/z*: 331 [M+H]<sup>+</sup> ; HRMS (ESI): *m/z*: calcd for C<sub>20</sub>H<sub>15</sub>N<sub>2</sub>OS: 331.08996 [M+H]<sup>+</sup> ; found: 331.08854.

### 2-(Furan-2-yl)-4-((1-phenylvinyl)oxy)quinazoline (27).

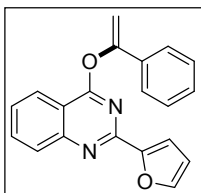

Yield: 71% (111 mg); white solid; mp: 153–155 °C; IR (neat):  $\nu_{\max}$  = 3055, 3024, 2921, 2852, 1730, 1598, 1574, 1491, 1443, 1312, 1263, 1219, 1025, 897, 772, 696  $\text{cm}^{-1}$ ;  $^1\text{H}$  NMR (500 MHz,  $\text{CDCl}_3$ ):  $\delta$  7.94 (dd,  $J$  = 5.1, 2.8 Hz, 2H), 7.55 – 7.51 (m, 1H), 7.45 – 7.40 (m, 2H), 7.36 – 7.27 (m, 4H), 7.20 – 7.17 (m, 2H), 7.08 – 7.06 (m, 1H), 5.54 (d,  $J$  = 3.4 Hz, 1H), 5.31 (d,  $J$  = 3.4 Hz, 1H);  $^{13}\text{C}$  NMR (100 MHz,  $\text{CDCl}_3$ ):  $\delta$  165.8, 157.6, 149.8, 146.3, 143.9, 142.0, 132.9, 129.0, 128.4, 128.2, 128.0, 127.7, 127.0, 126.5, 126.1, 116.2, 114.1, 101.9; MS (ESI):  $m/z$ : 315  $[\text{M}+\text{H}]^+$ ; HRMS (ESI):  $m/z$ : calcd for  $\text{C}_{20}\text{H}_{15}\text{N}_2\text{O}_2$ : 315.11280  $[\text{M}+\text{H}]^+$ ; found: 315.11146.

### 6-Chloro-2-phenyl-4-((1-phenylvinyl)oxy)quinazoline (28).

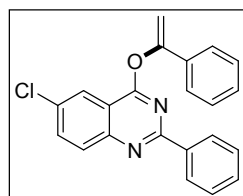

Yield: 72% (129 mg); yellow solid; mp: 151–152 °C; IR (neat):  $\nu_{\max}$  = 3059, 3026, 2921, 2851, 1571, 1555, 1260, 764, 700  $\text{cm}^{-1}$ ;  $^1\text{H}$  NMR (400 MHz,  $\text{CDCl}_3$ ):  $\delta$  8.37 (d,  $J$  = 2.3 Hz, 1H), 8.28 (dd,  $J$  = 7.7, 1.9 Hz, 2H), 7.97 (d,  $J$  = 9.0 Hz, 1H), 7.81 (dd,  $J$  = 9.0, 2.3 Hz, 1H), 7.59 (dd,  $J$  = 8.0, 1.5 Hz, 1H), 7.42 – 7.37 (m, 2H), 7.35 – 7.27 (m, 3H), 7.21 – 7.16 (m, 2H), 5.61 (d,  $J$  = 2.1 Hz, 1H), 5.28 (d,  $J$  = 2.1 Hz, 1H);  $^{13}\text{C}$  NMR (100 MHz,  $\text{CDCl}_3$ ):  $\delta$  165.3, 160.3, 155.1, 150.9, 134.7, 130.7, 129.8, 128.8, 128.5, 128.3, 128.1, 127.8, 126.2, 125.2, 122.5, 115.5, 114.2, 102.1; MS (ESI):  $m/z$ : 359  $[\text{M}+\text{H}]^+$ ; HRMS (ESI):  $m/z$ : calcd for  $\text{C}_{22}\text{H}_{16}\text{ClN}_2\text{O}$ : 359.09457  $[\text{M}+\text{H}]^+$ ; found: 359.09480.

### 2-Phenyl-4-((1-phenylvinyl)oxy)thieno[3,2-*d*]pyrimidine (29).

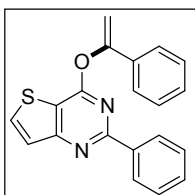

Yield: 77% (127 mg); colorless solid; mp: 148–149 °C IR (neat):  $\nu_{\max}$  = 3057, 3027, 2923, 2853, 1722, 1599, 1565, 1526, 1260, 773, 696  $\text{cm}^{-1}$ ;  $^1\text{H}$  NMR (500 MHz,  $\text{CDCl}_3$ ):  $\delta$  8.26 (d,  $J$  = 2.0 Hz, 1H), 8.24 (dd,  $J$  = 2.7, 1.8 Hz, 1H), 7.94 (d,  $J$  = 5.4 Hz, 1H), 7.60 (dd,  $J$  = 8.2, 1.5 Hz, 1H), 7.58 (d,  $J$  = 5.4 Hz, 1H), 7.41 (d,  $J$  = 8.3 Hz, 1H), 7.39 (dd,  $J$  = 5.2, 1.9 Hz, 1H), 7.33 – 7.28 (m, 2H), 7.25 – 7.23 (m, 1H), 7.18 (d,  $J$  = 8.0 Hz, 1H), 7.14 (d,  $J$  = 7.1 Hz, 1H), 5.60 (d,  $J$  = 2.2 Hz, 1H), 5.30 (d,  $J$  =

2.2 Hz, 1H);  $^{13}\text{C}$  NMR (100 MHz,  $\text{CDCl}_3$ ):  $\delta$  164.1, 163.3, 161.2, 154.8, 144.4, 137.5, 134.7, 133.8, 130.2, 129.3, 129.1, 128.6, 128.3, 125.3, 115.4, 102.0; MS (ESI):  $m/z$ : 331  $[\text{M}+\text{H}]^+$ .

#### 4-((1-Phenylvinyl)oxy)-2-(3,4,5-trimethoxyphenyl)quinazoline (30).

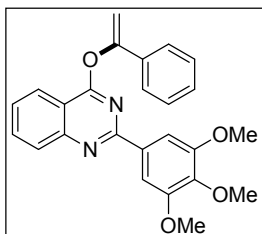

Yield: 91% (188 mg); pale yellow solid; mp: 136–137 °C; IR (neat):  $\nu_{\text{max}}$  = 3057, 2933, 2838, 1598, 1492, 1454, 1376, 770, 698  $\text{cm}^{-1}$ ;  $^1\text{H}$  NMR (500 MHz,  $\text{CDCl}_3$ ):  $\delta$  8.38 (d,  $J$  = 8.1 Hz, 1H), 8.02 (d,  $J$  = 8.4 Hz, 1H), 7.93 (d,  $J$  = 7.9 Hz, 1H), 7.85 (t,  $J$  = 7.7 Hz, 1H), 7.59 – 7.57 (m, 2H), 7.44 – 7.40 (m, 1H), 7.37 – 7.33 (m, 1H), 7.29 – 7.23 (m, 2H), 7.18 – 7.17 (m, 1H), 5.58 (s, 1H), 5.27 (s, 1H), 3.87 (s, 9H);  $^{13}\text{C}$  NMR (125 MHz,  $\text{CDCl}_3$ ):  $\delta$  165.8, 159.3, 155.3, 152.8, 152.3, 140.1, 133.8, 132.9, 128.6, 128.4, 127.9, 126.6, 126.1, 124.9, 123.3, 114.5, 105.3, 101.7, 60.7, 55.9; MS (ESI):  $m/z$ : 415  $[\text{M}+\text{H}]^+$ ; HRMS (ESI):  $m/z$  calcd for  $\text{C}_{25}\text{H}_{23}\text{N}_2\text{O}_4$ : 415.16523  $[\text{M}+\text{H}]^+$ ; found: 415.16502.

#### 2-((1-Phenylvinyl)oxy)pyridine (31).<sup>1</sup>

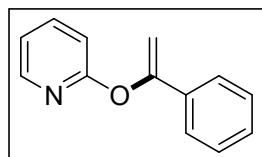

Yield: 78% (76 mg); white solid; IR (neat):  $\nu_{\text{max}}$  = 2922, 2852, 1728, 1643, 1592, 1492, 1466, 1429, 1266, 1243, 1075, 963, 772, 694  $\text{cm}^{-1}$ ;  $^1\text{H}$  NMR (400 MHz,  $\text{CDCl}_3$ ):  $\delta$  8.18 (dd,  $J$  = 4.8, 1.3 Hz, 1H), 7.66 – 7.62 (m, 1H), 7.59 (dd,  $J$  = 7.9, 1.8 Hz, 2H), 7.34 – 7.28 (m, 3H), 6.96 – 6.92 (m, 2H), 5.42 (d,  $J$  = 2.0 Hz, 1H), 4.96 (d,  $J$  = 2.0 Hz, 1H);  $^{13}\text{C}$  NMR (125 MHz,  $\text{CDCl}_3$ ):  $\delta$  163.1, 156.1, 147.9, 139.3, 134.8, 128.6, 128.3, 125.4, 118.3, 111.4, 99.1; MS (ESI):  $m/z$ : 198  $[\text{M}+\text{H}]^+$ .

1. J. Yang and G. B. Dudley, *Adv. Synth. Catal.*, 2010, **352**, 3438.

#### 1-Chloro-4-(1-diazoethyl)benzene.

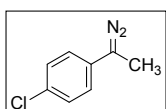

Yield: 94%;  $^1\text{H}$  NMR (500 MHz,  $\text{CDCl}_3$ ):  $\delta$  7.89 (d,  $J$  = 8.6 Hz, 2H), 7.43 (d,  $J$  = 8.6 Hz, 2H), 2.59 (s, 3H);  $^{13}\text{C}$  NMR (125 MHz,  $\text{CDCl}_3$ ):  $\delta$  196.7, 139.5, 135.3, 129.6, 128.8, 26.5; MS (ESI):  $m/z$ : 189  $[\text{M}+\text{Na}]^+$ .



# 1.5 <sup>1</sup>H and <sup>13</sup>C NMR Spectra for compounds (1-30)

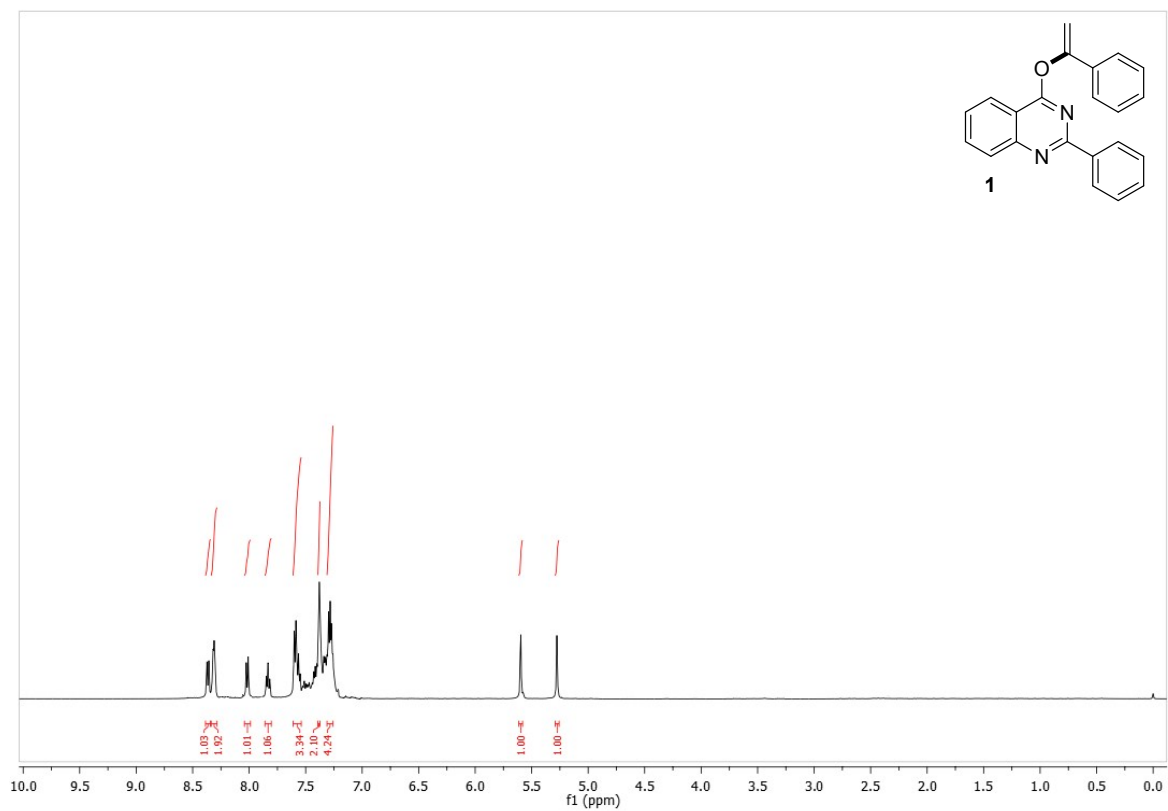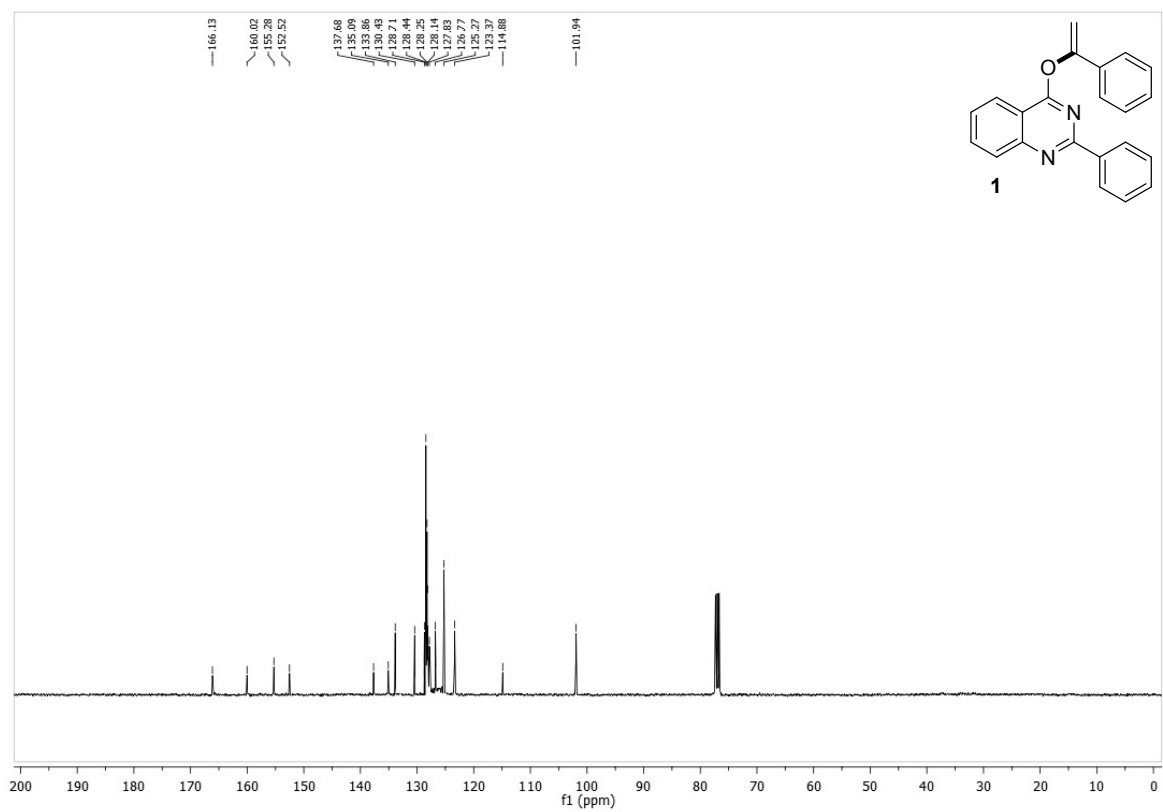

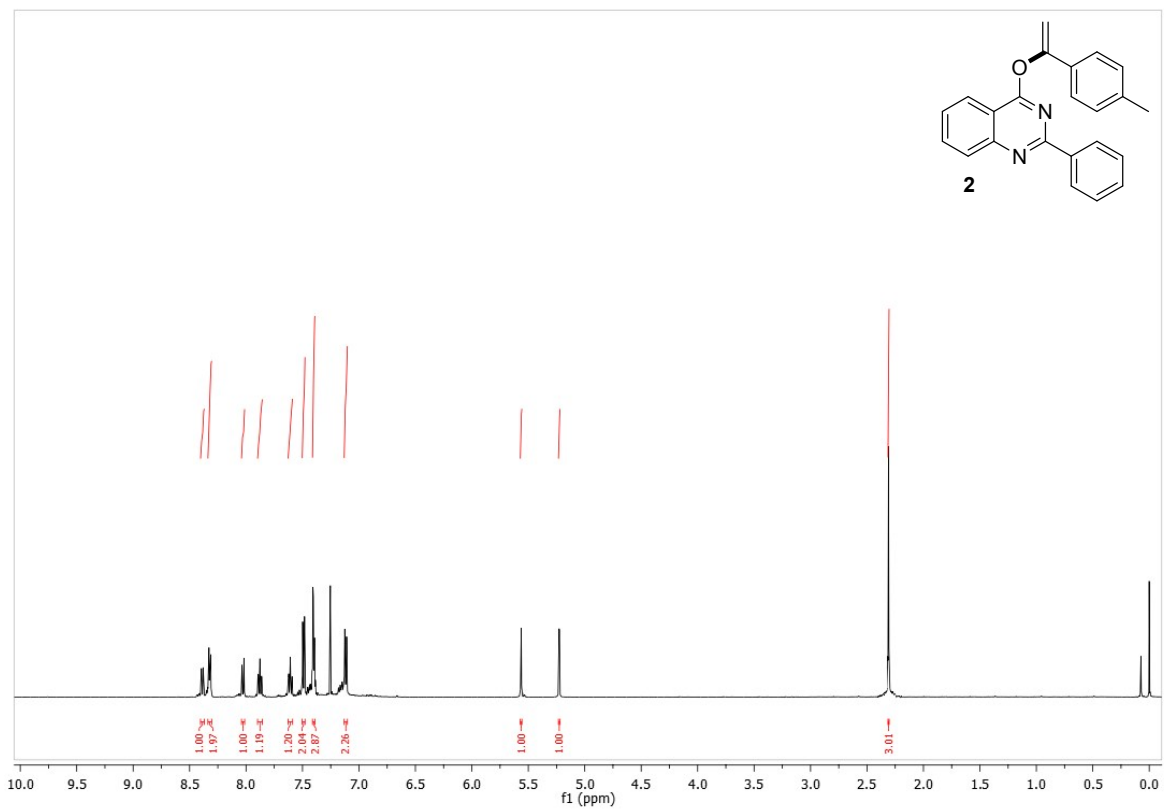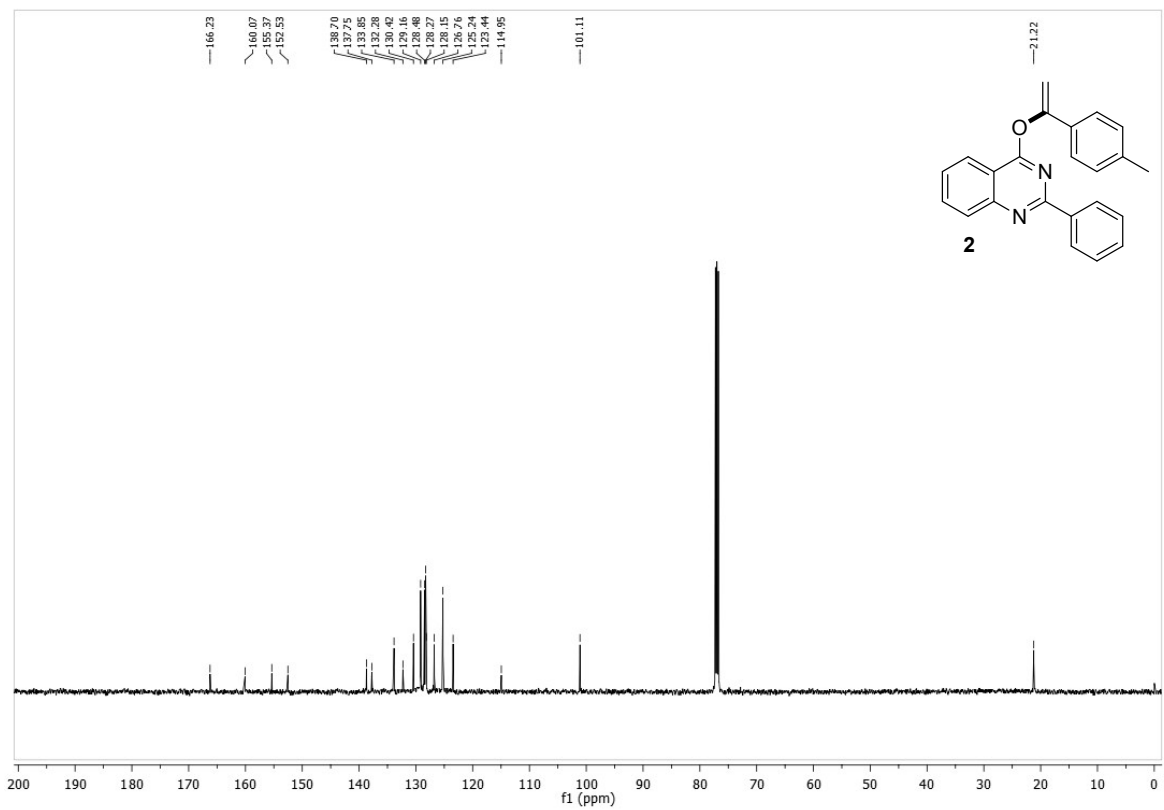

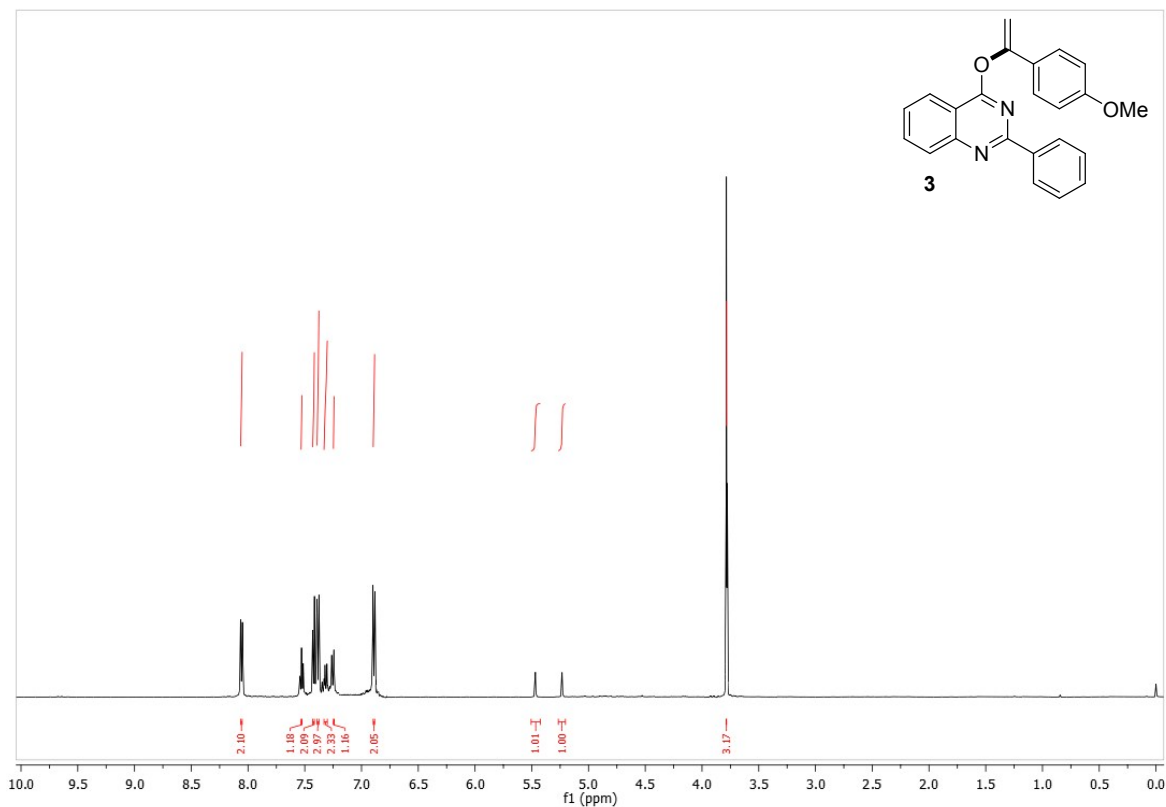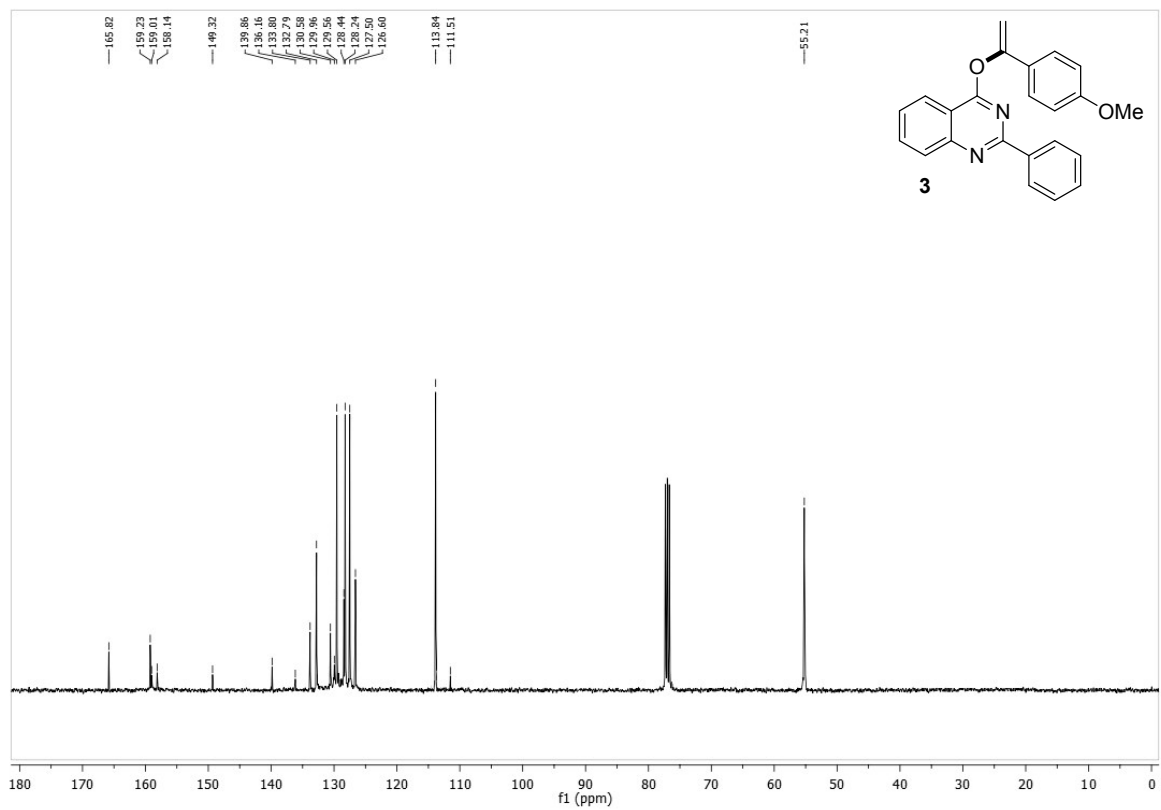

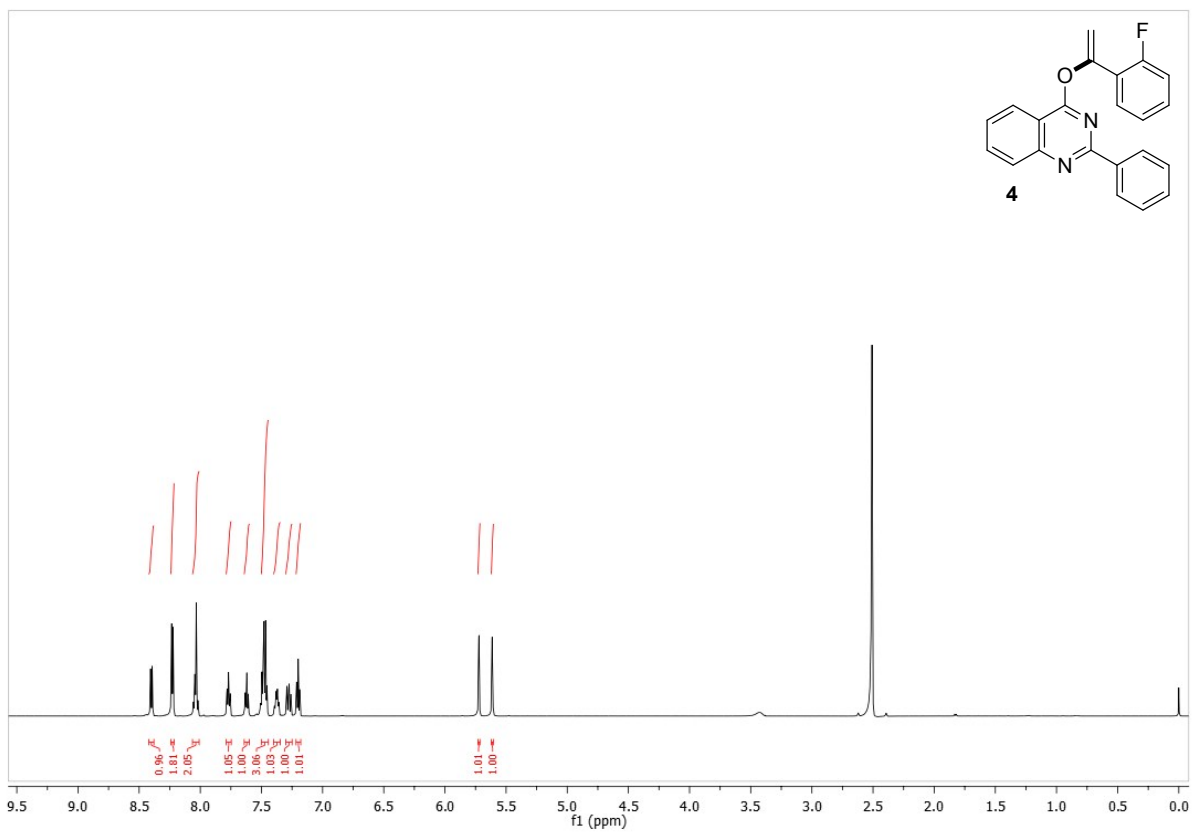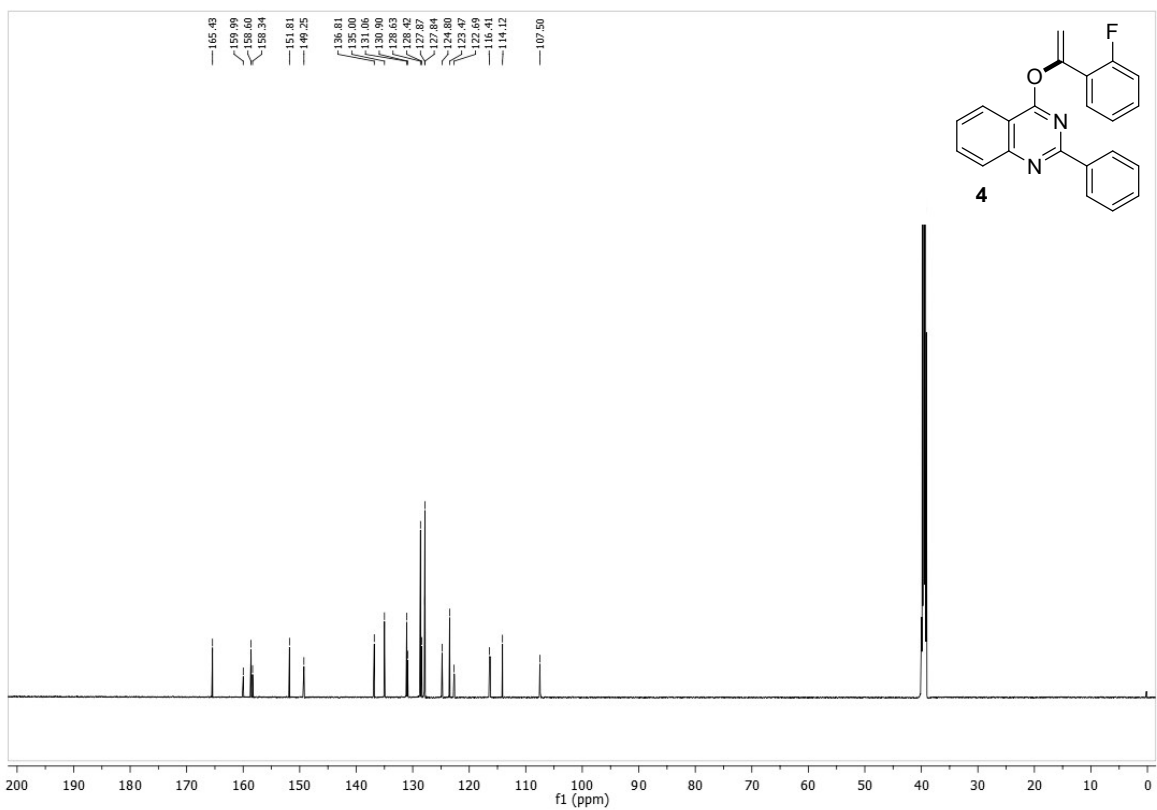

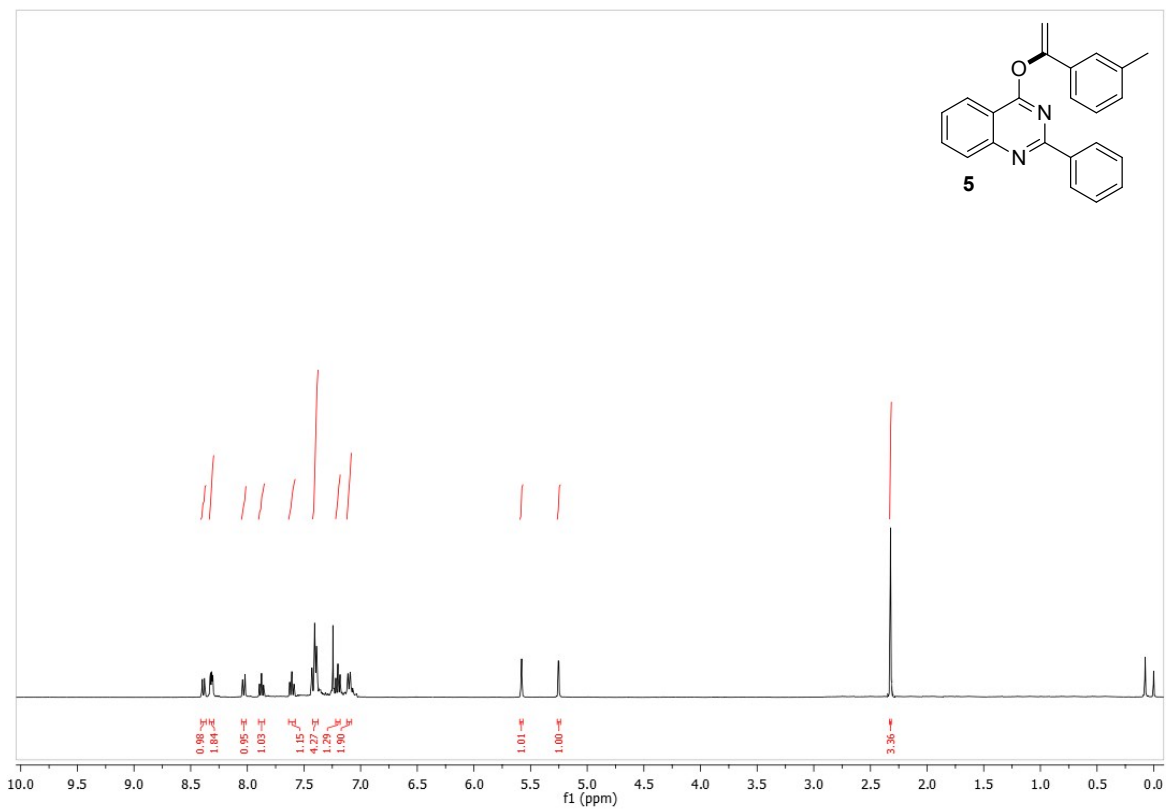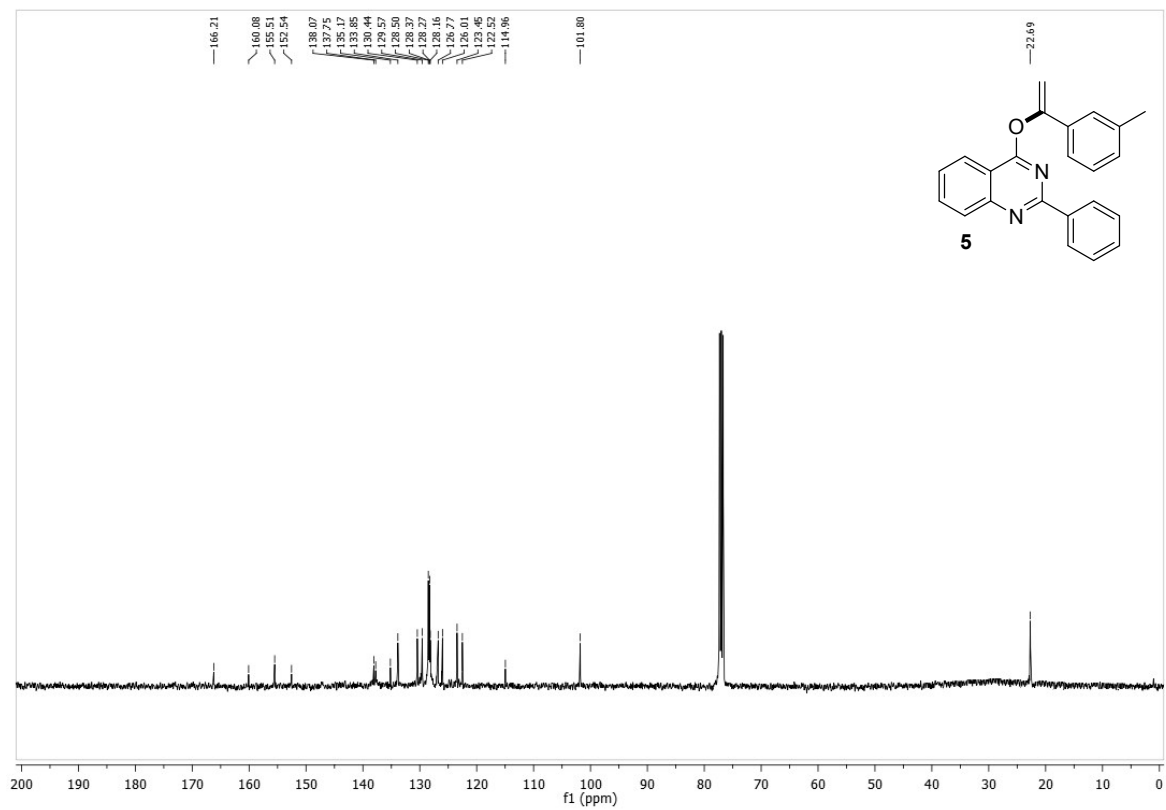

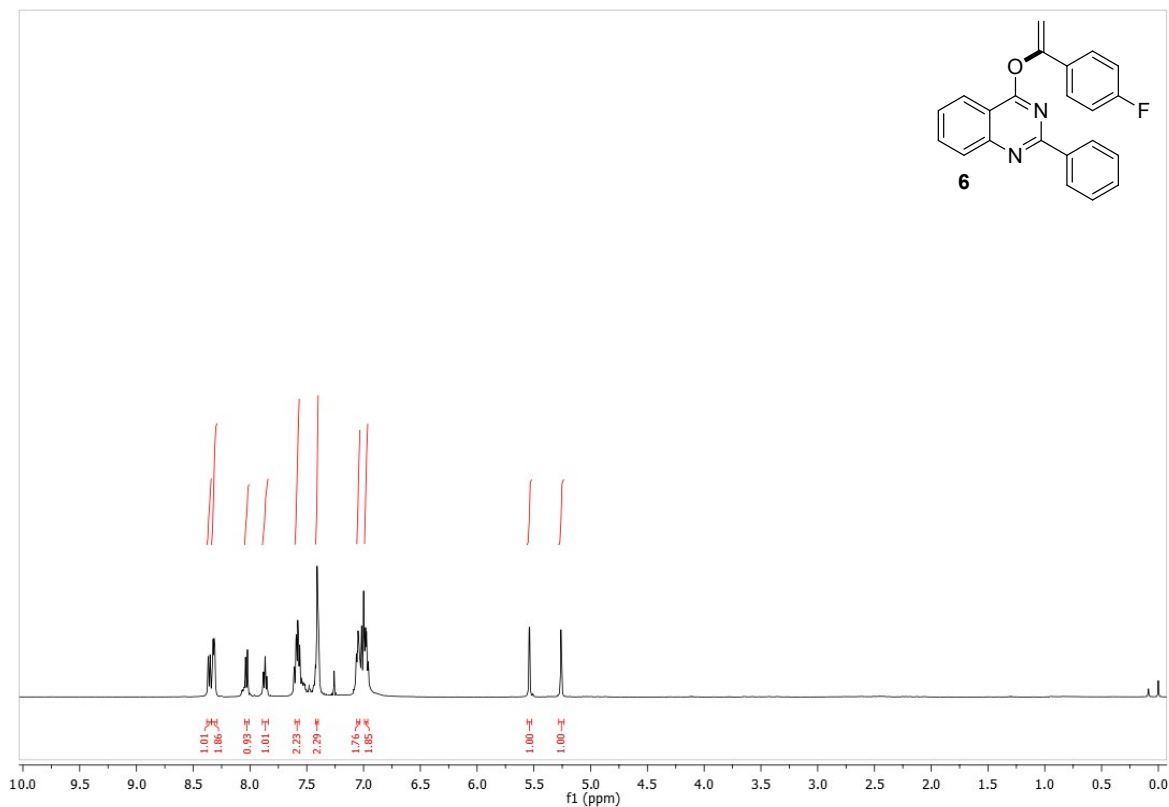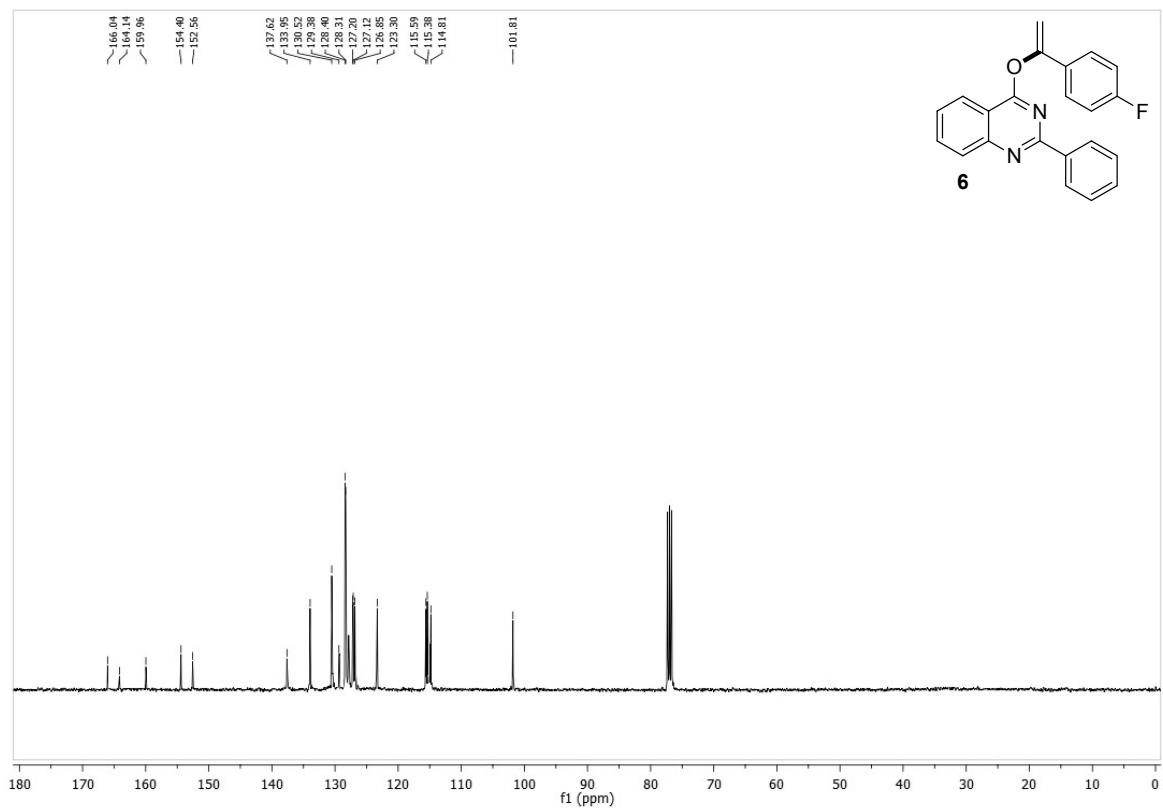

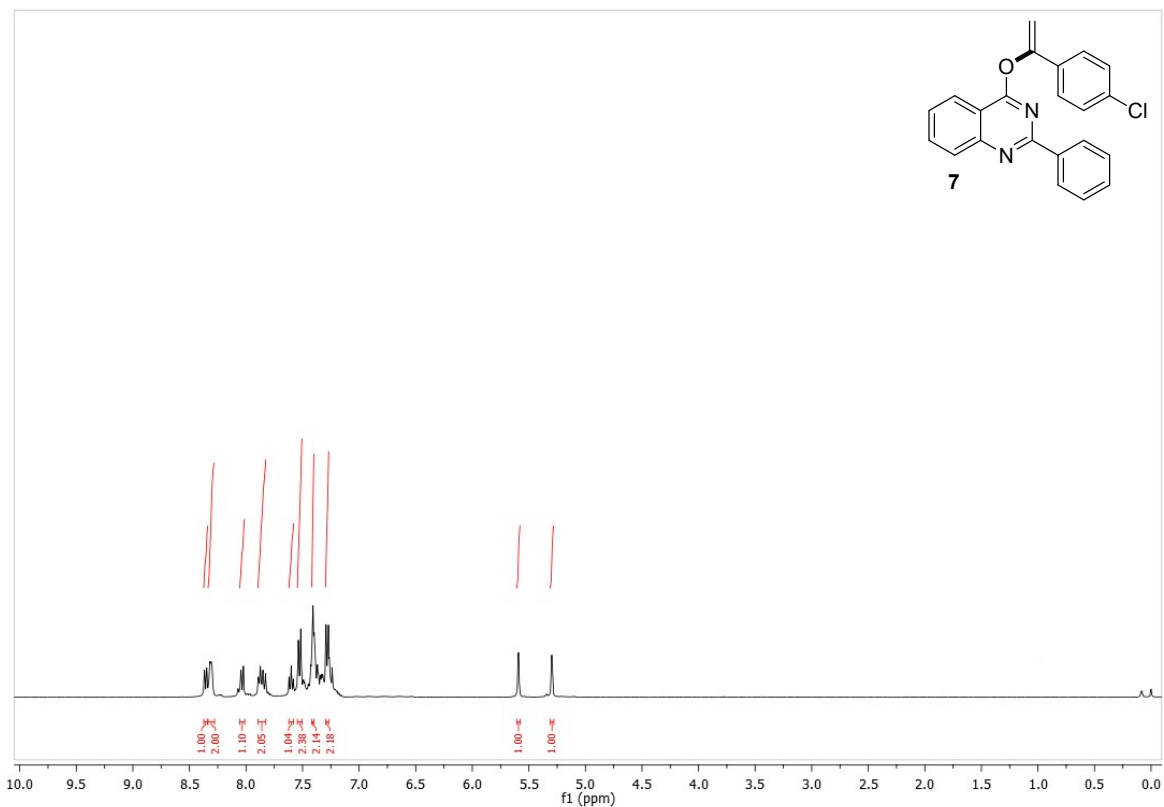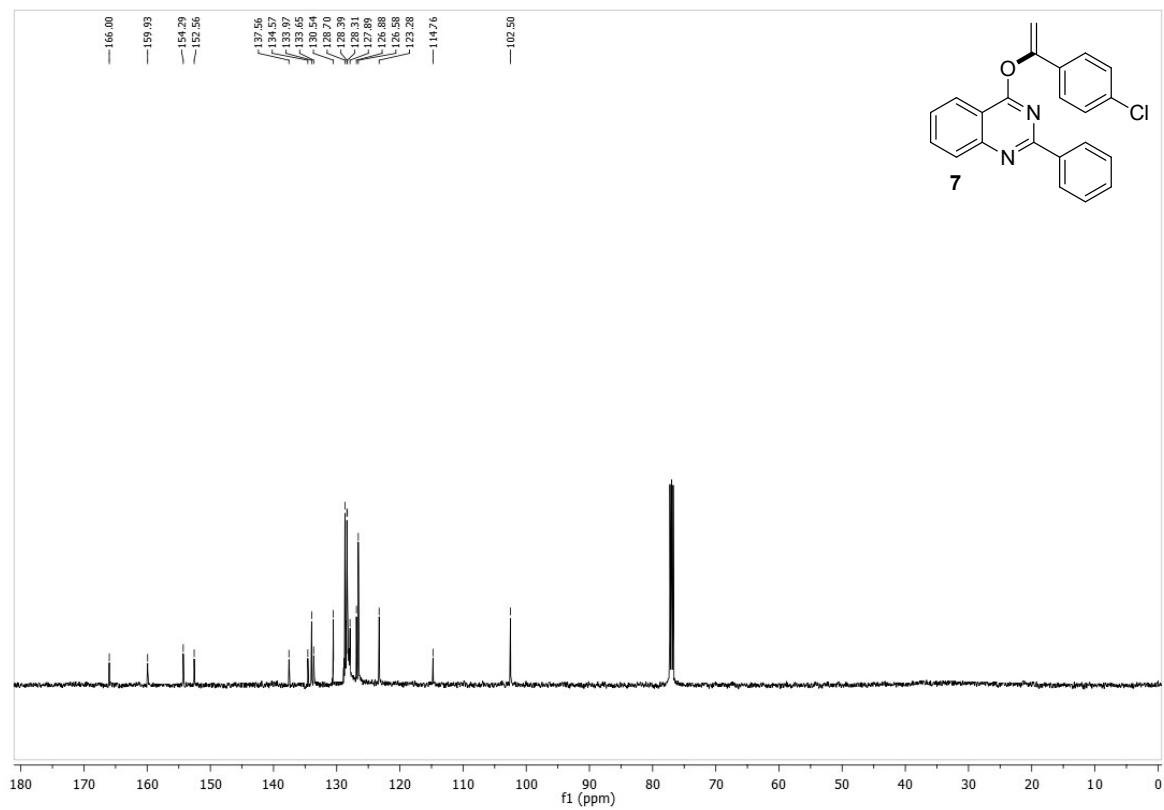

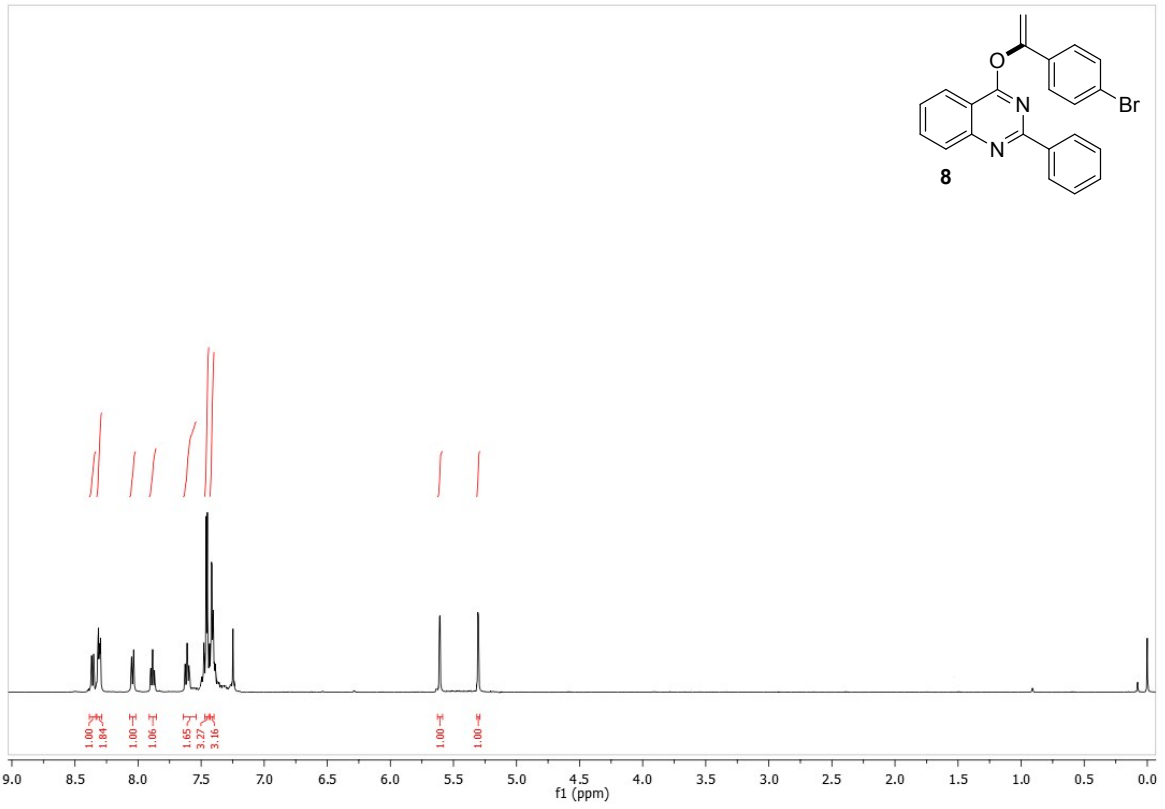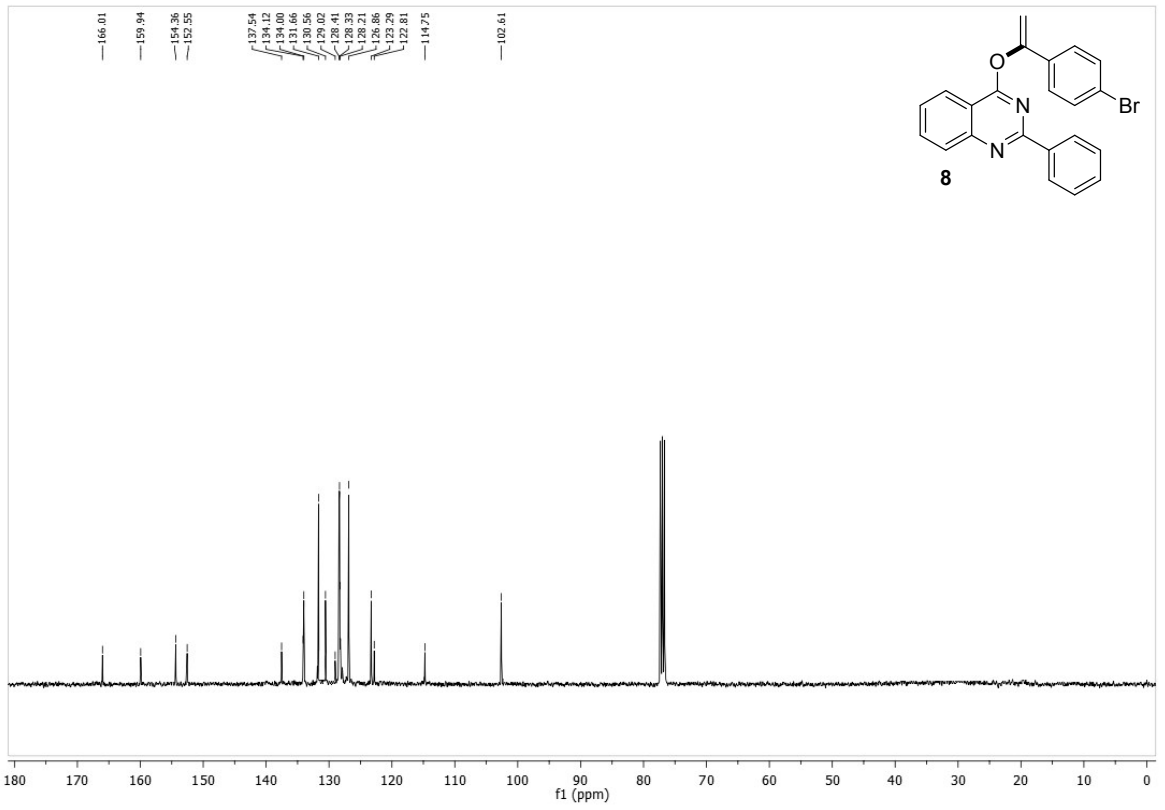



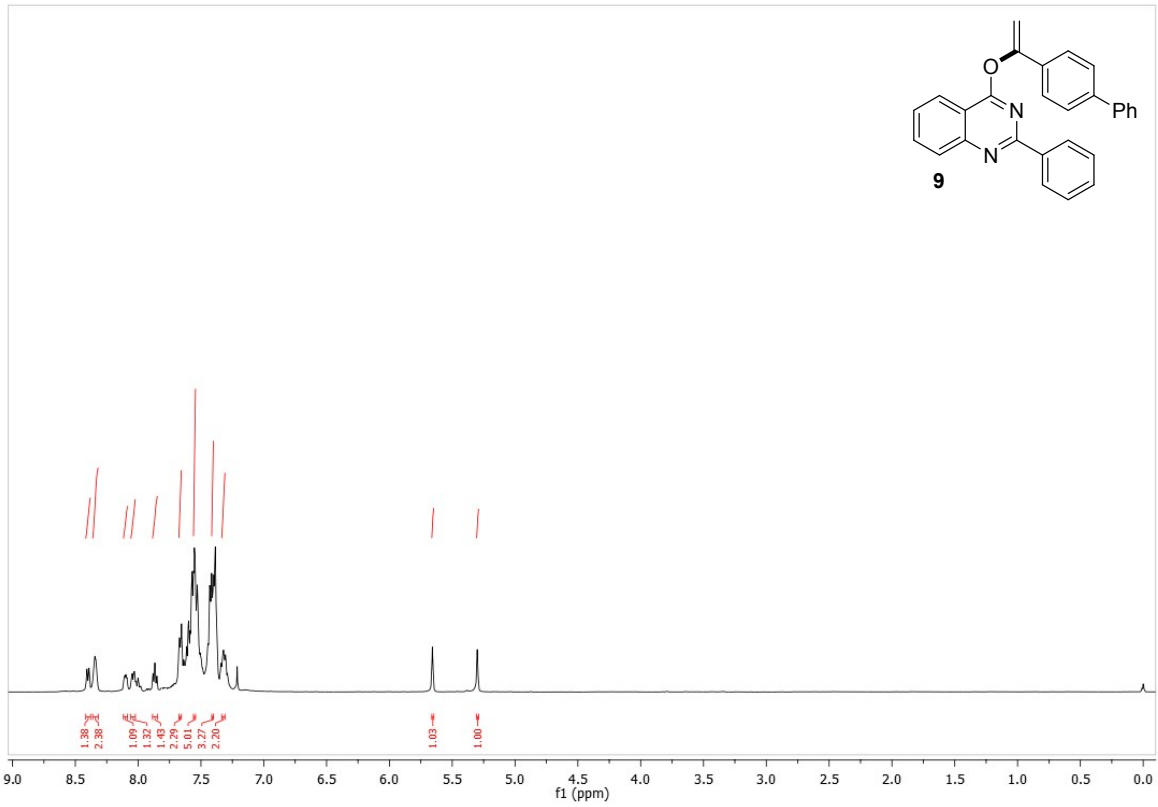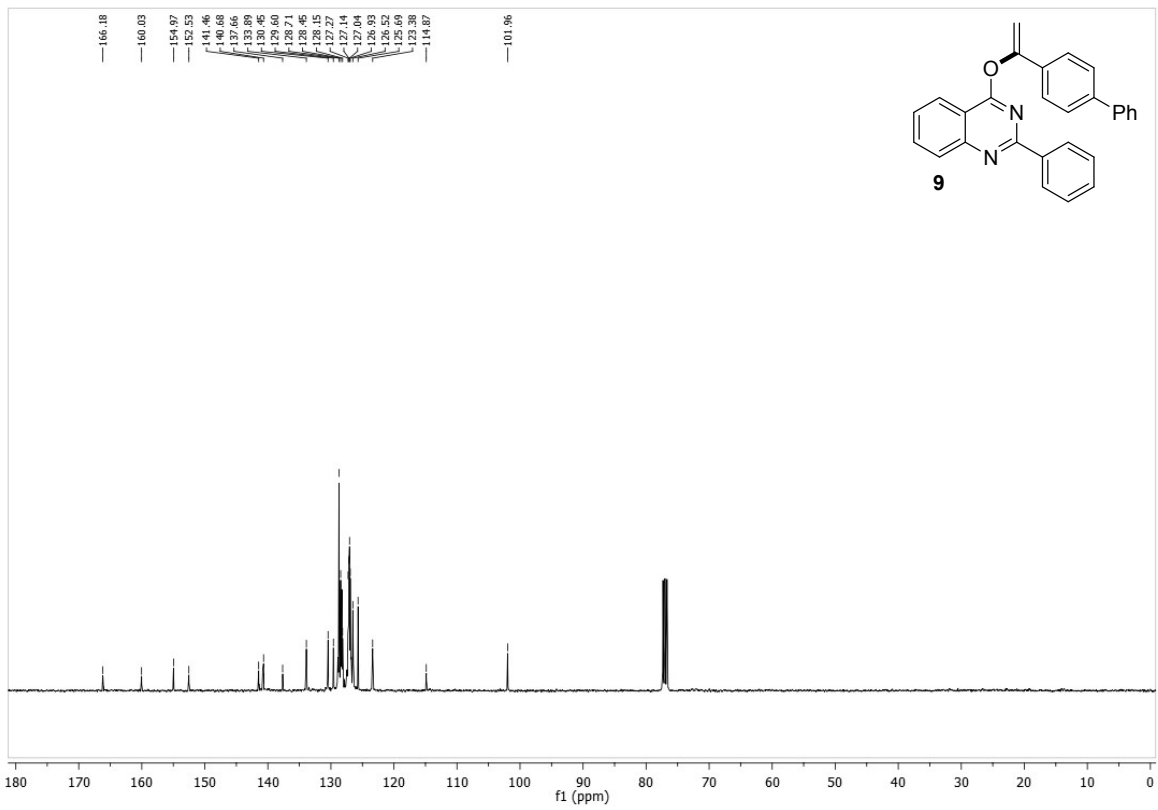

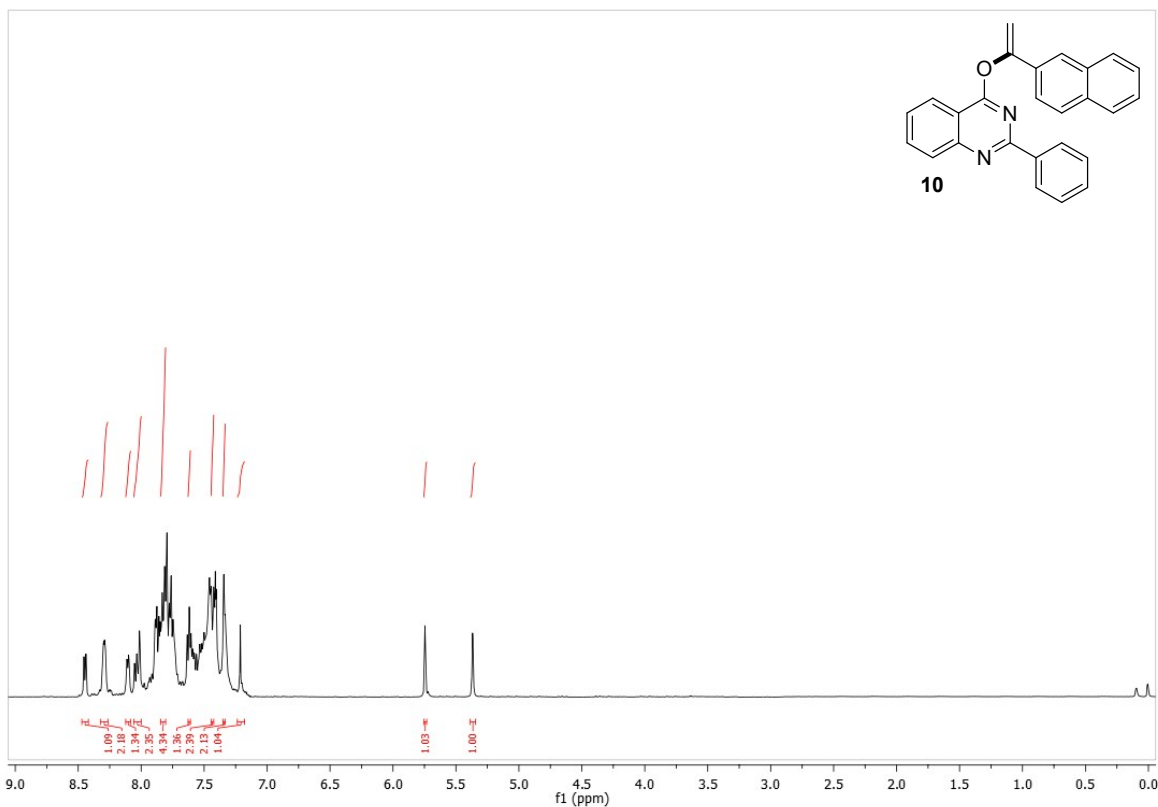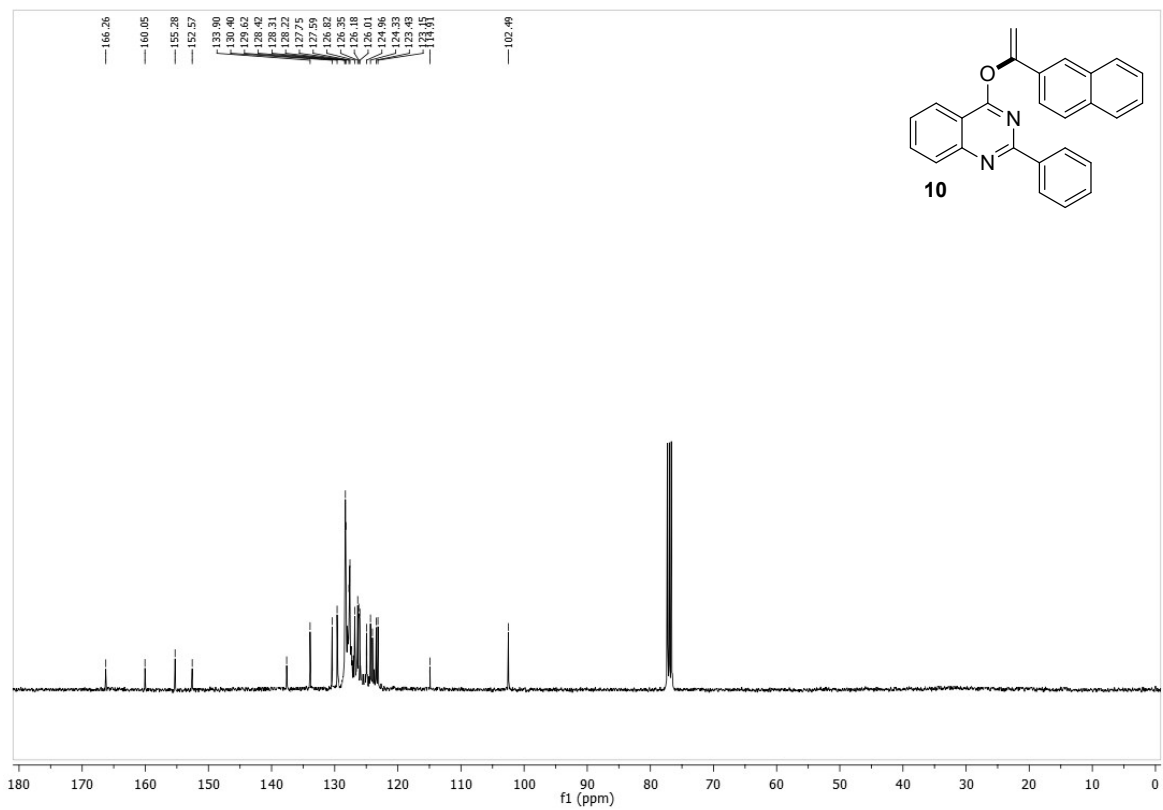

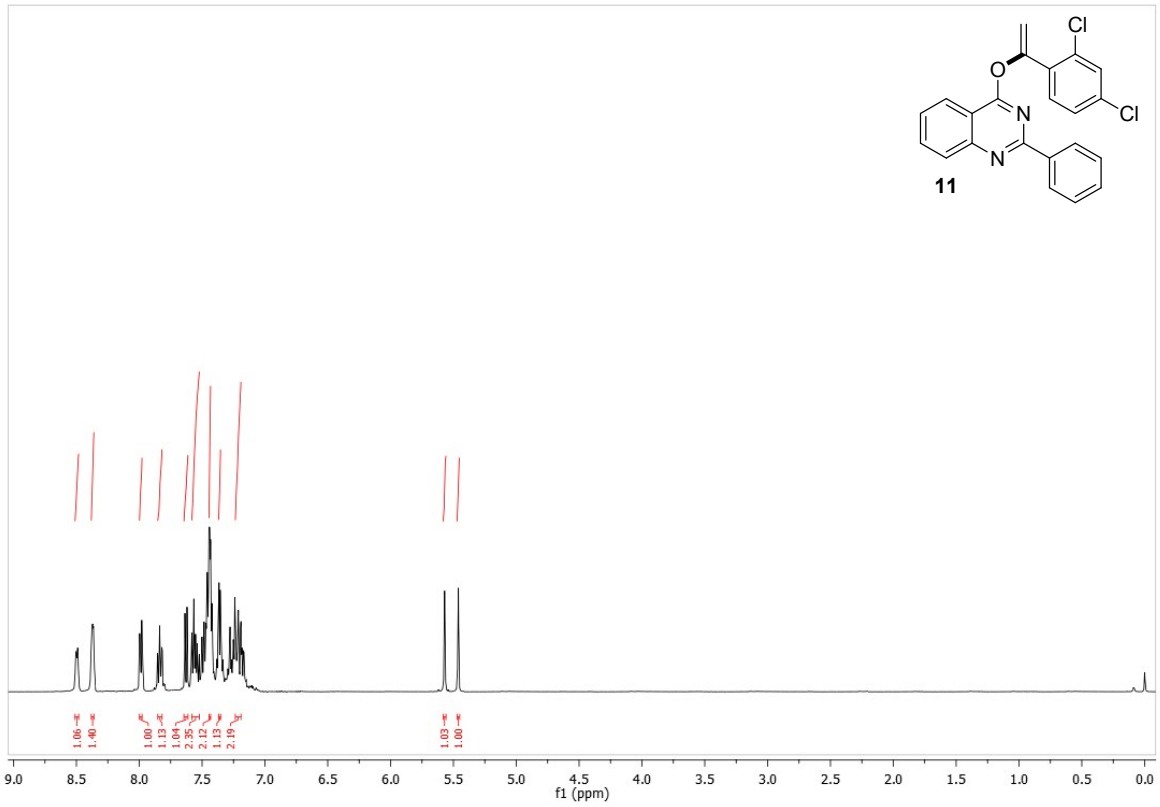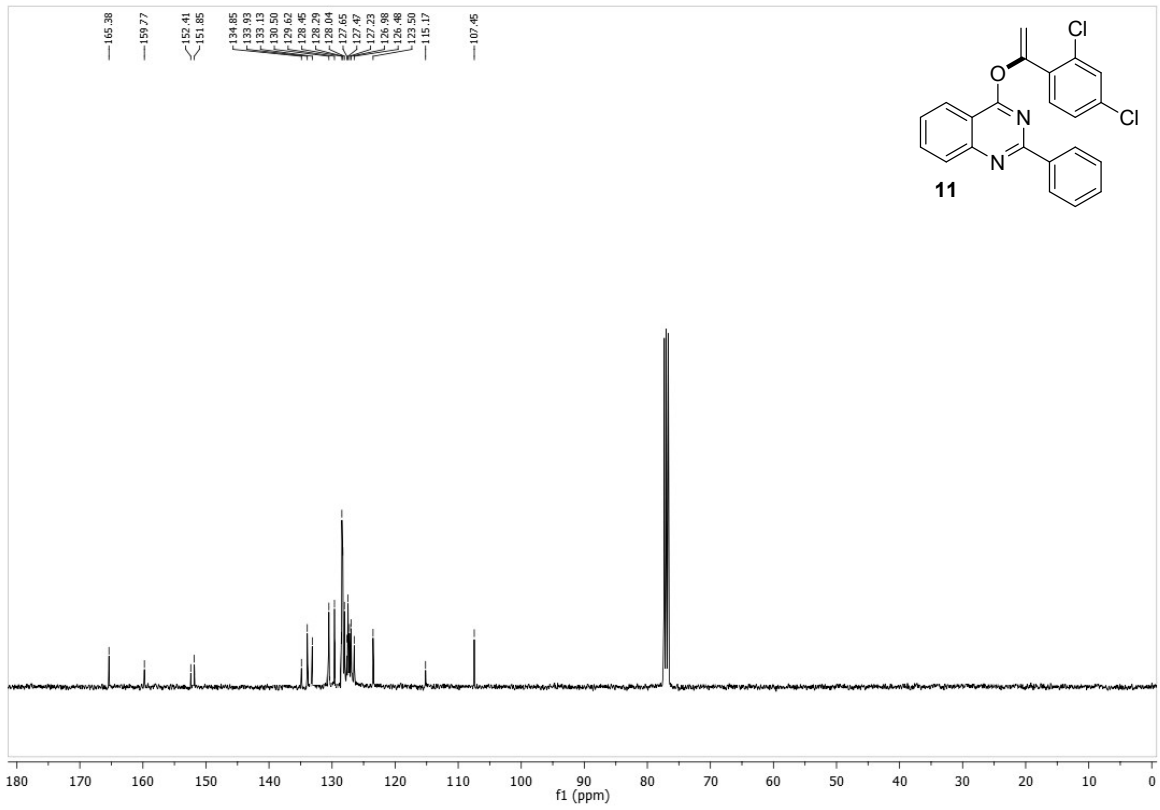

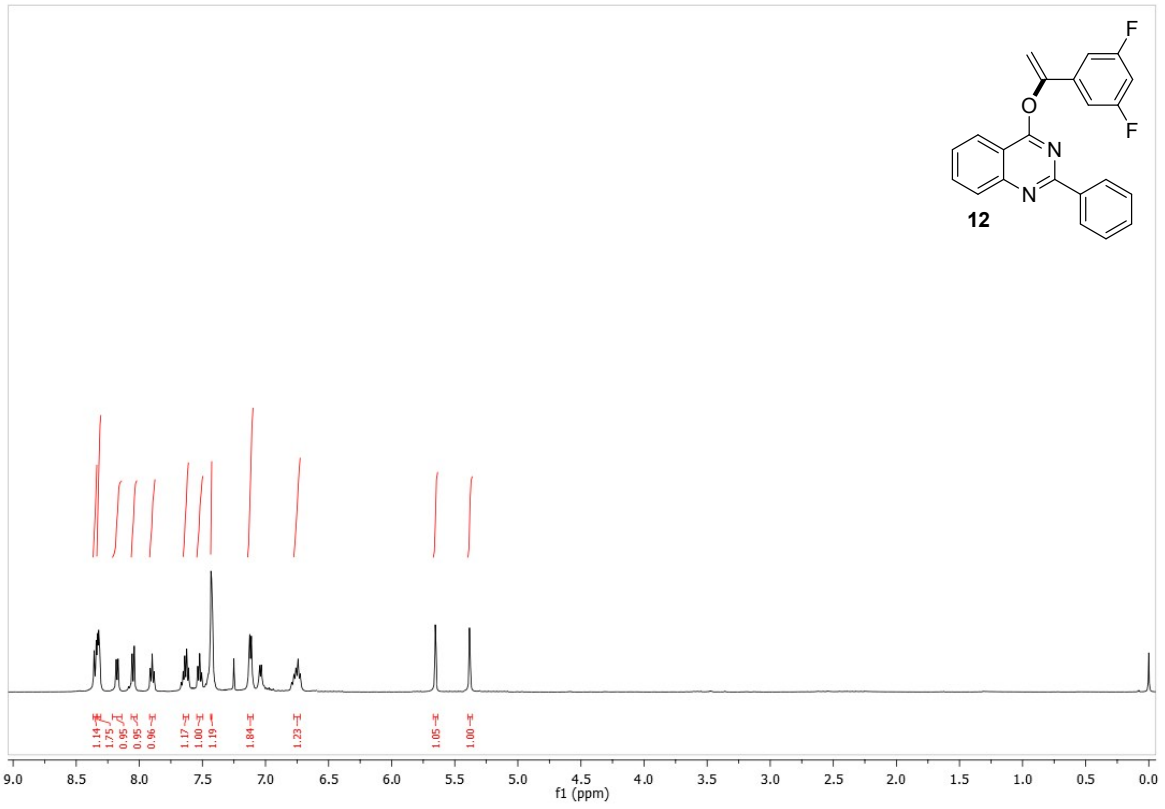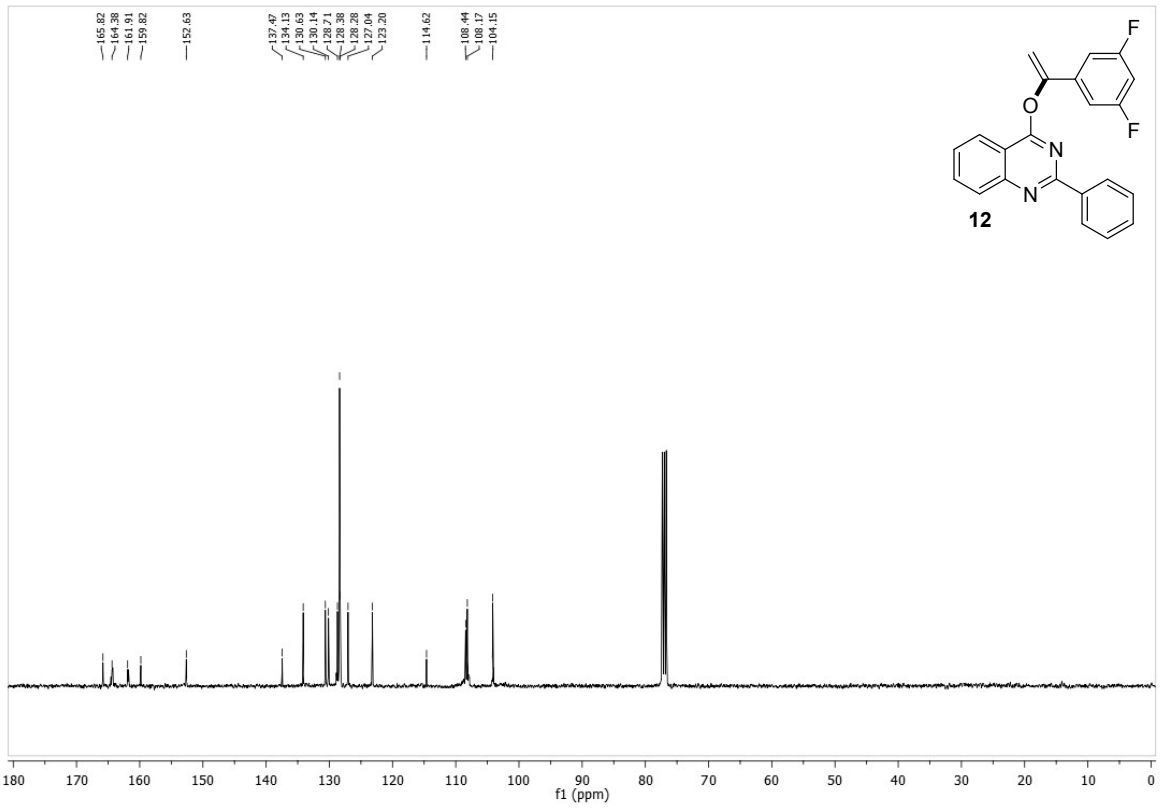

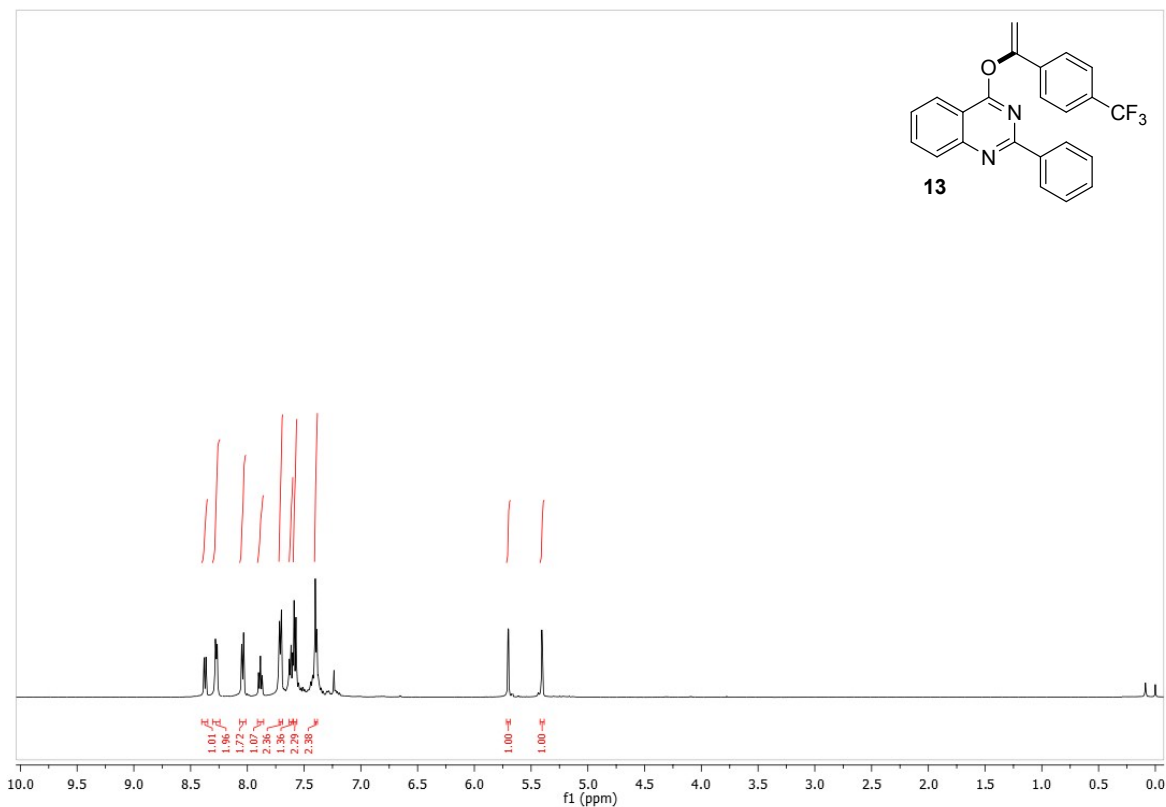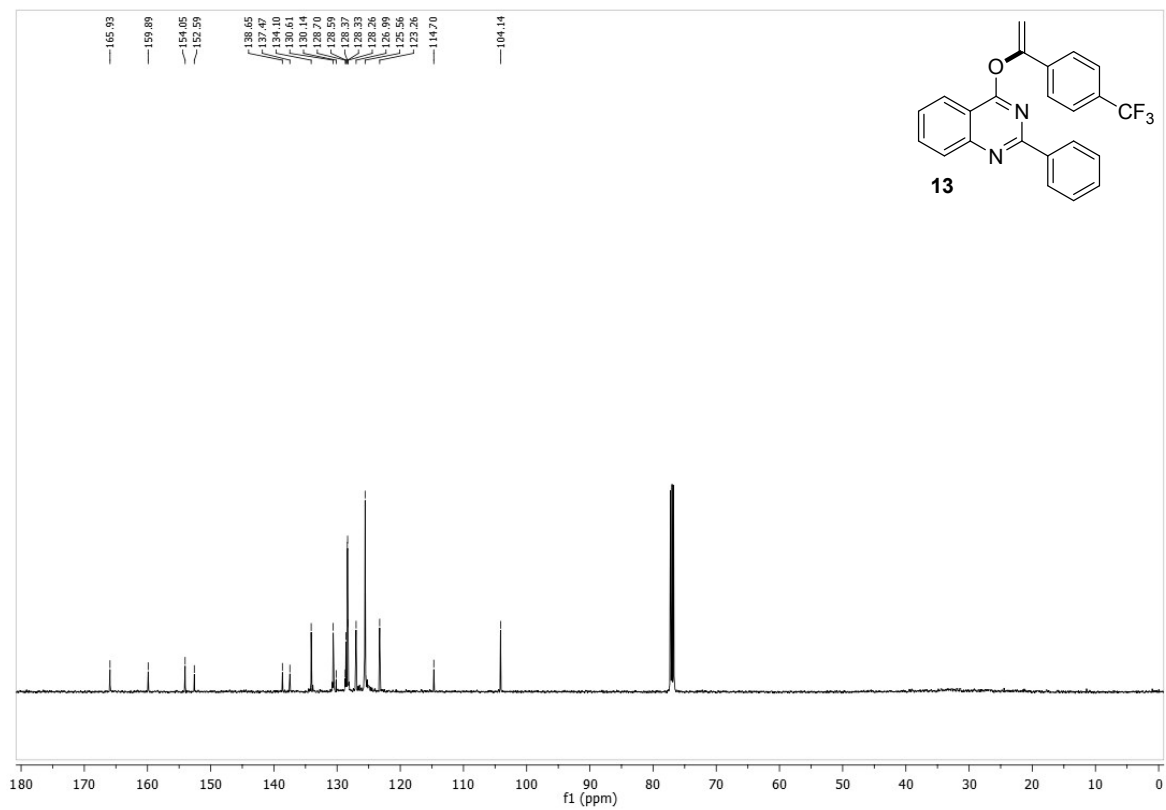

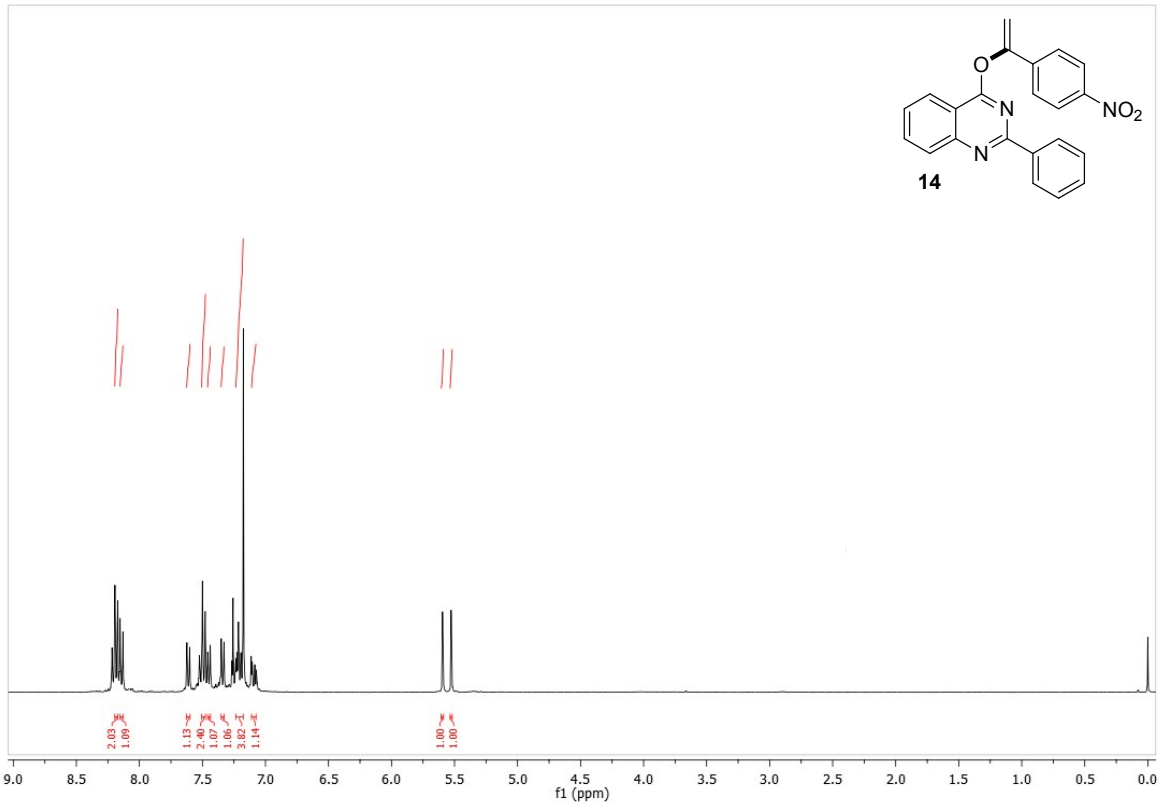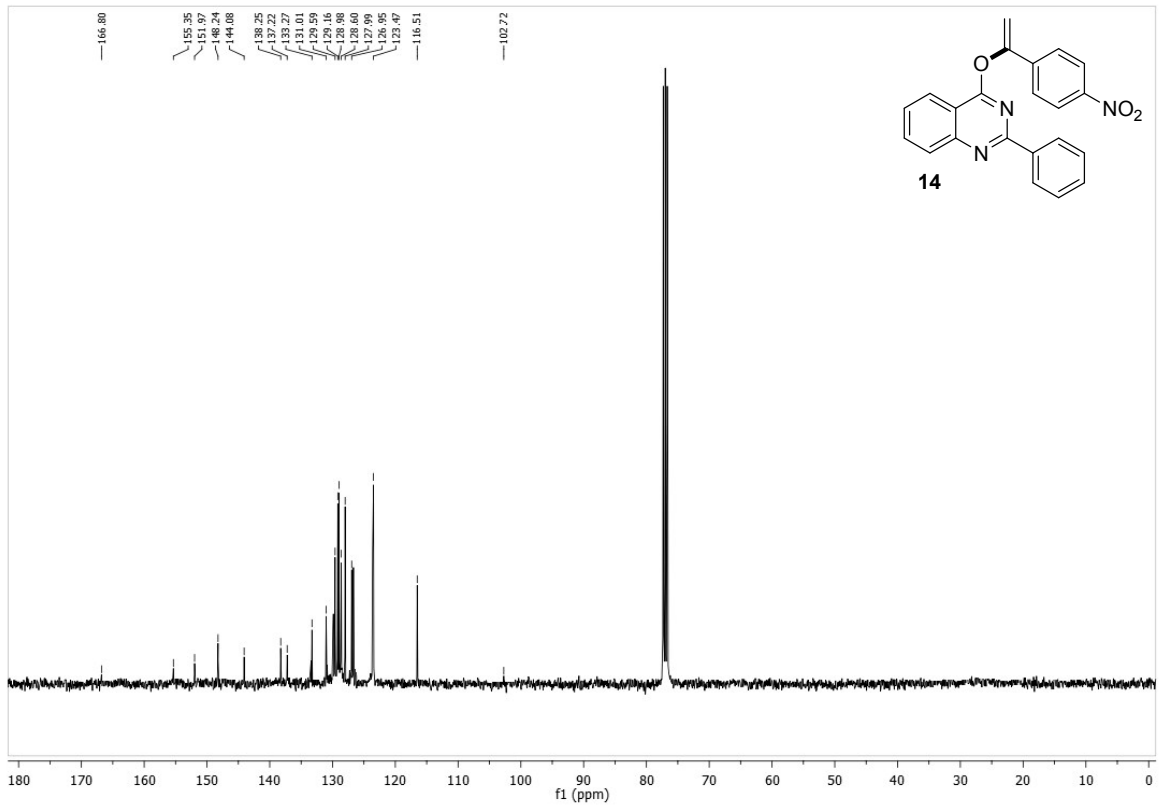

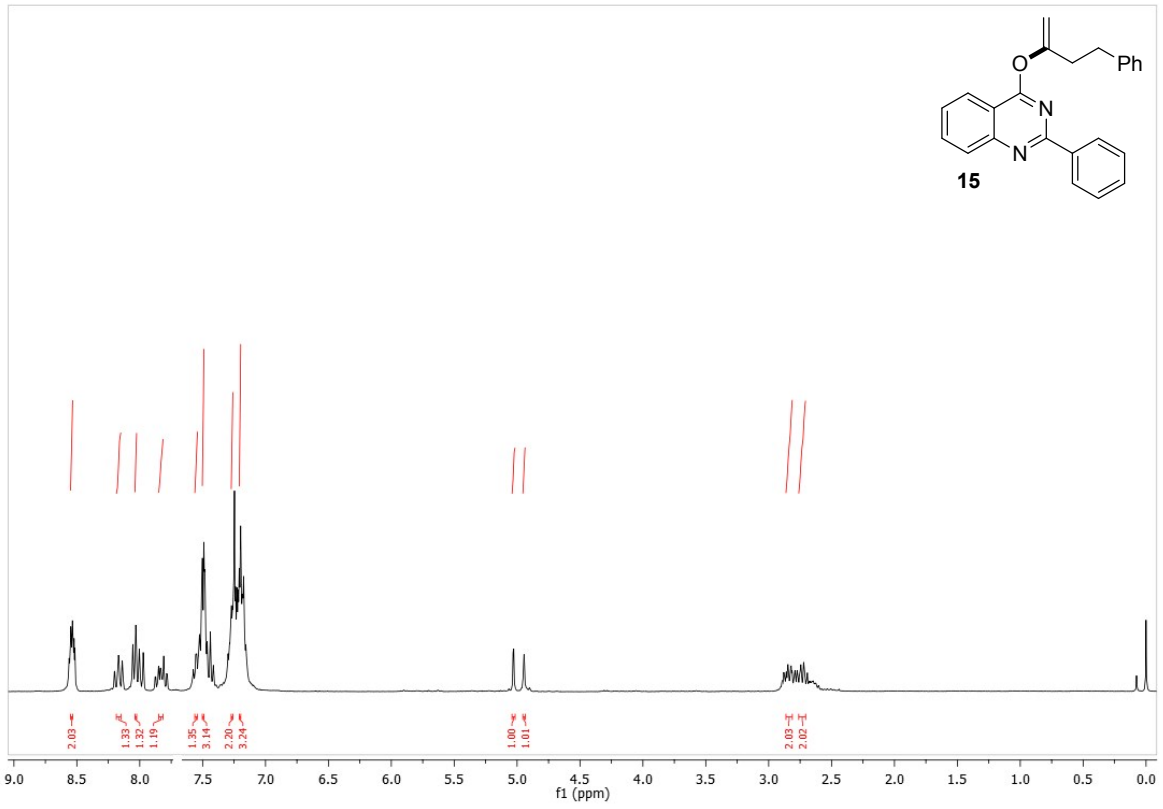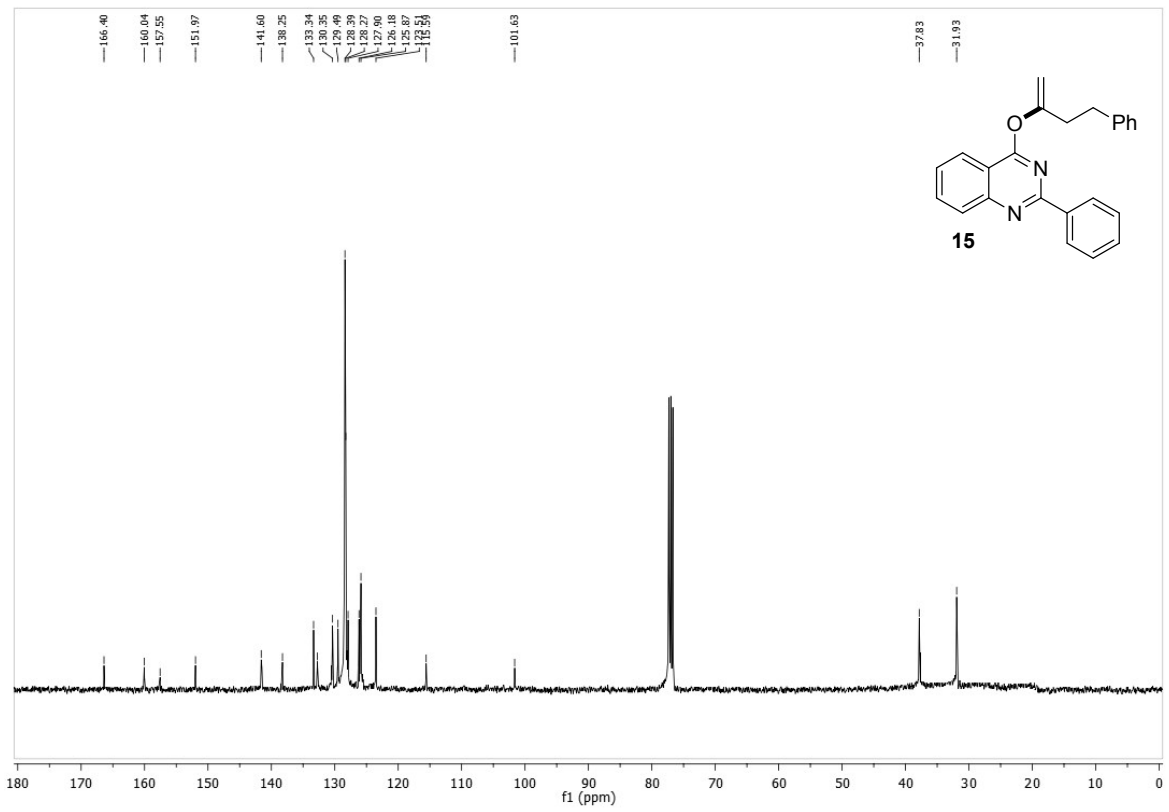

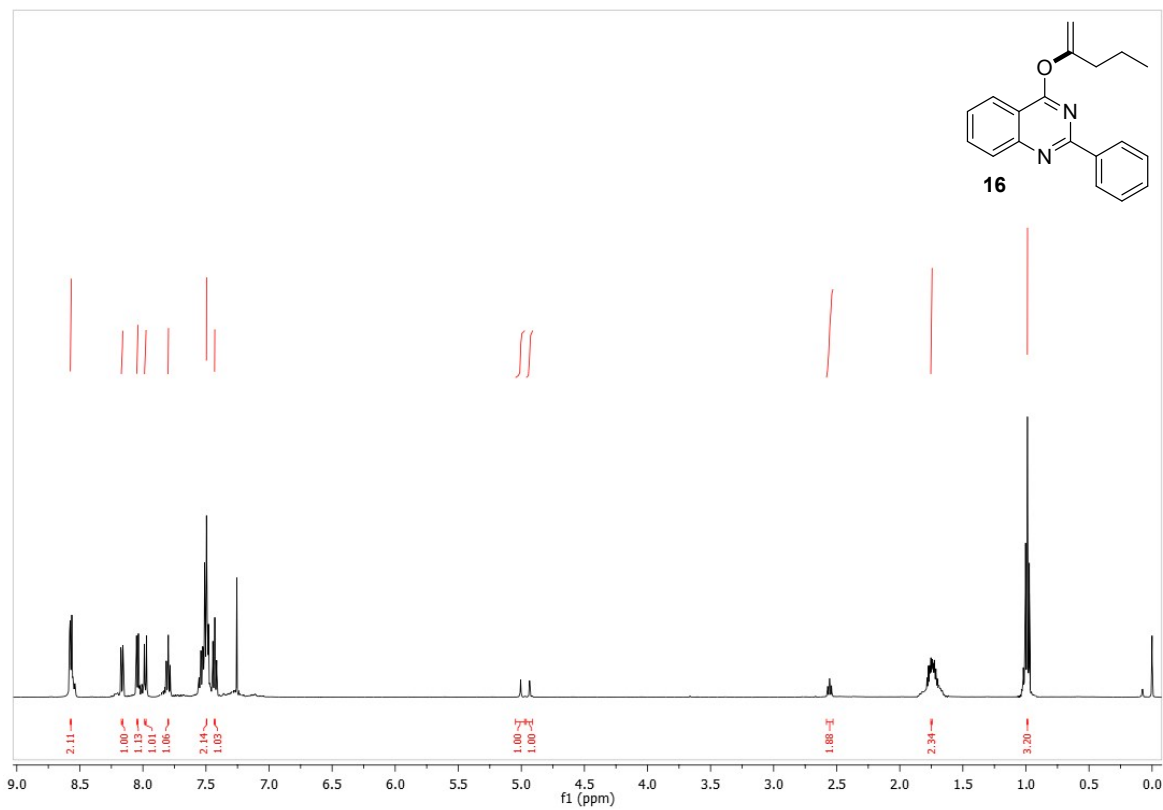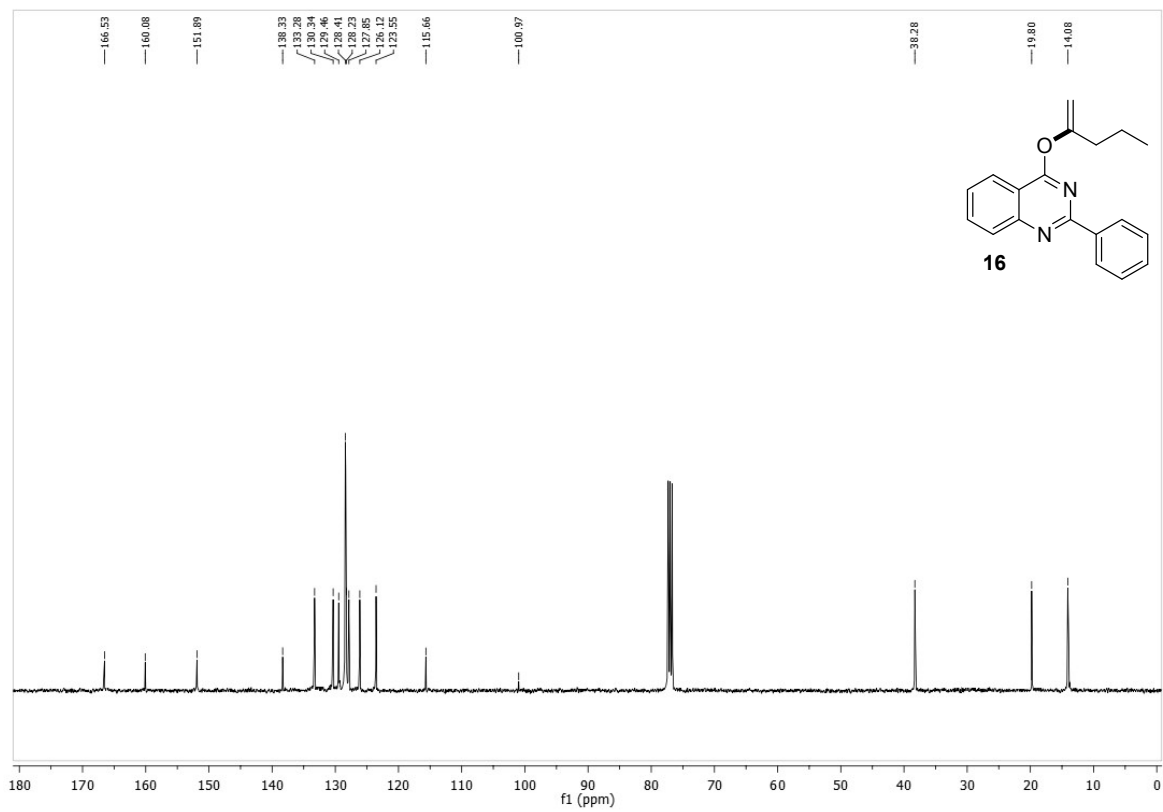



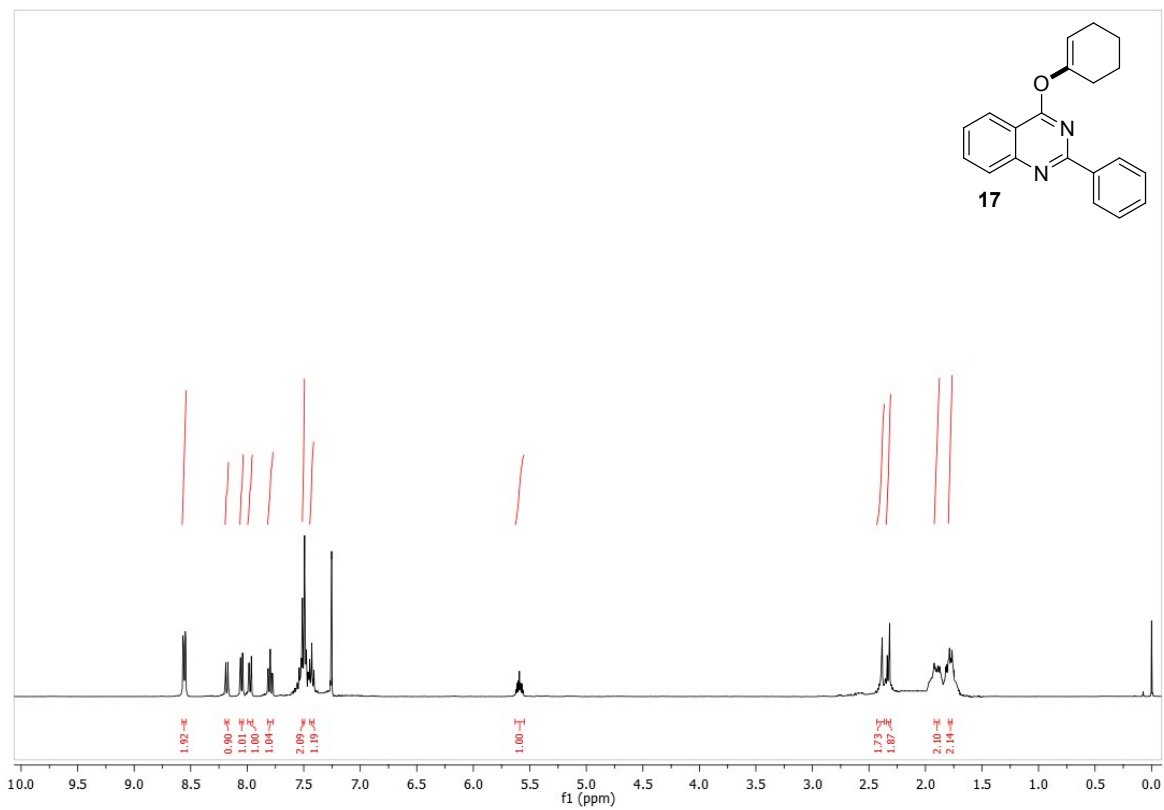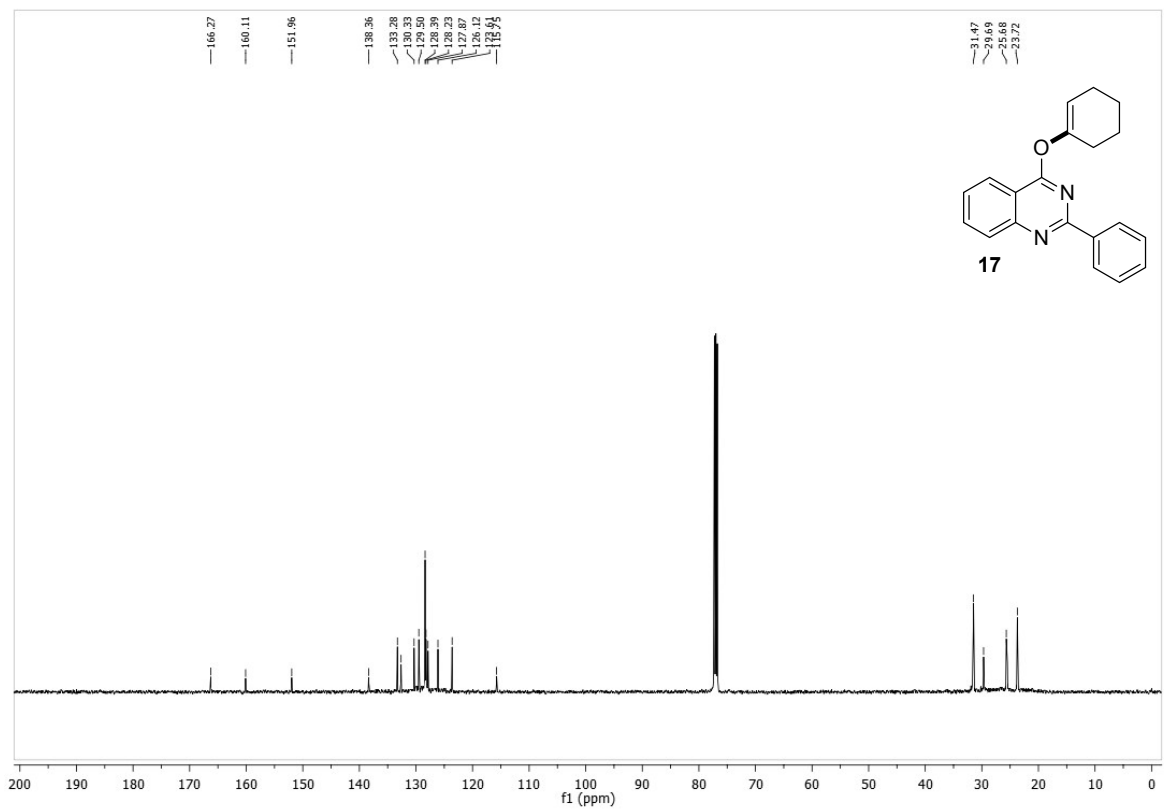

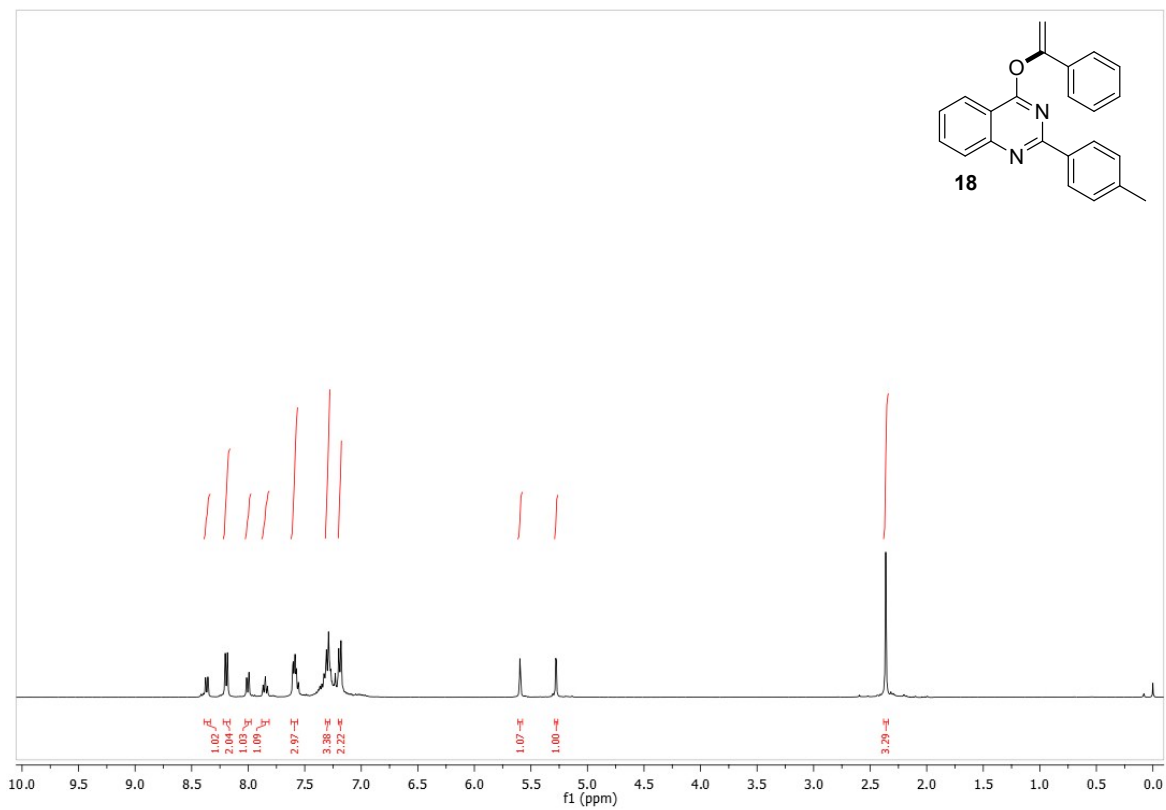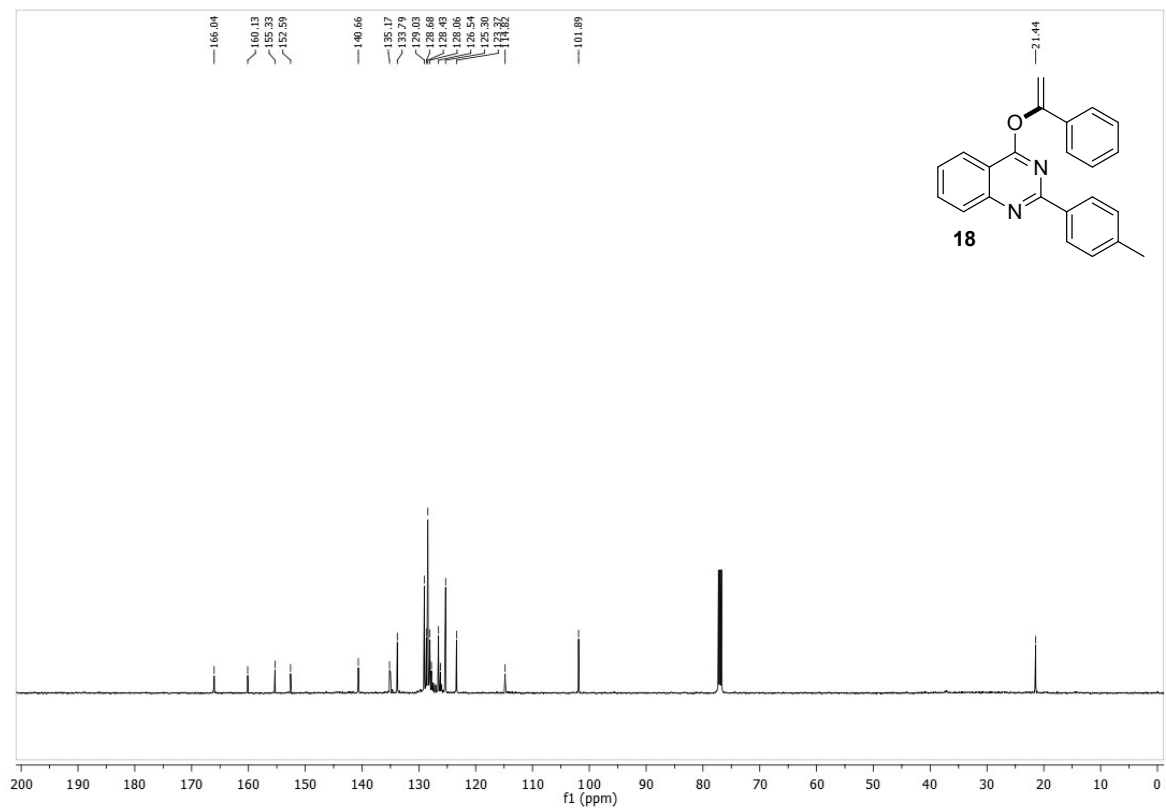

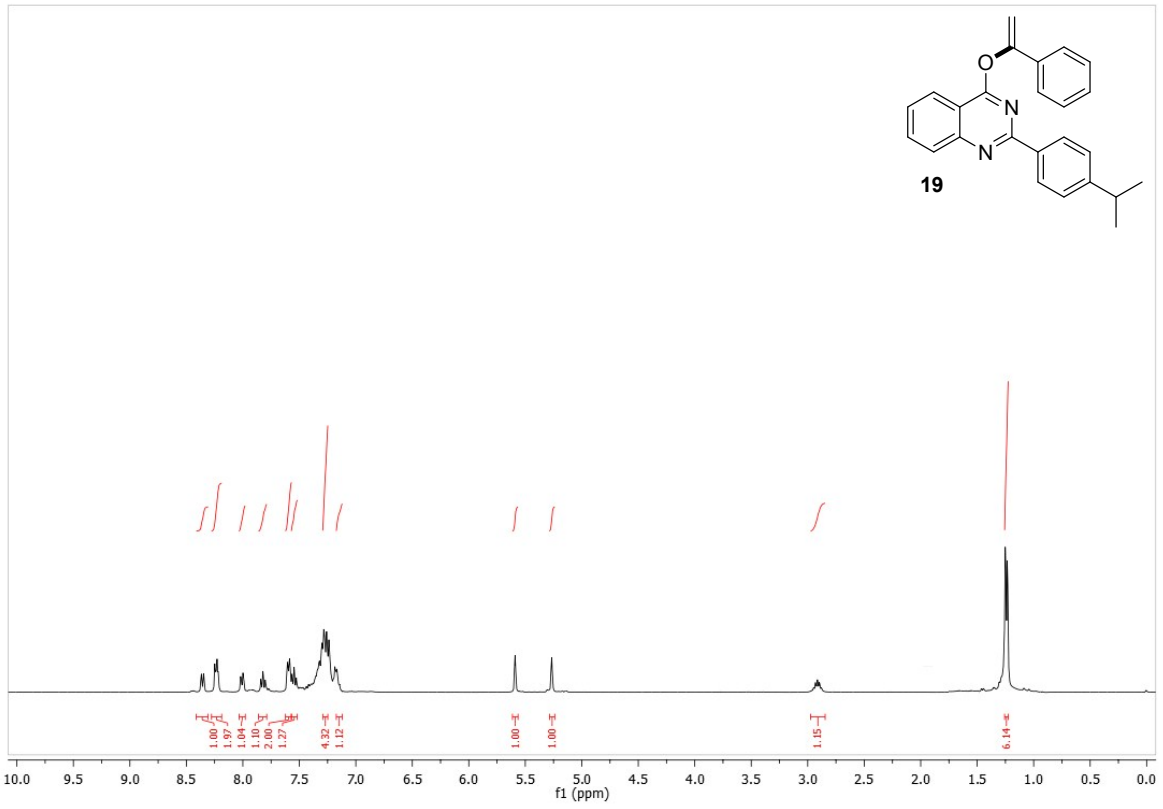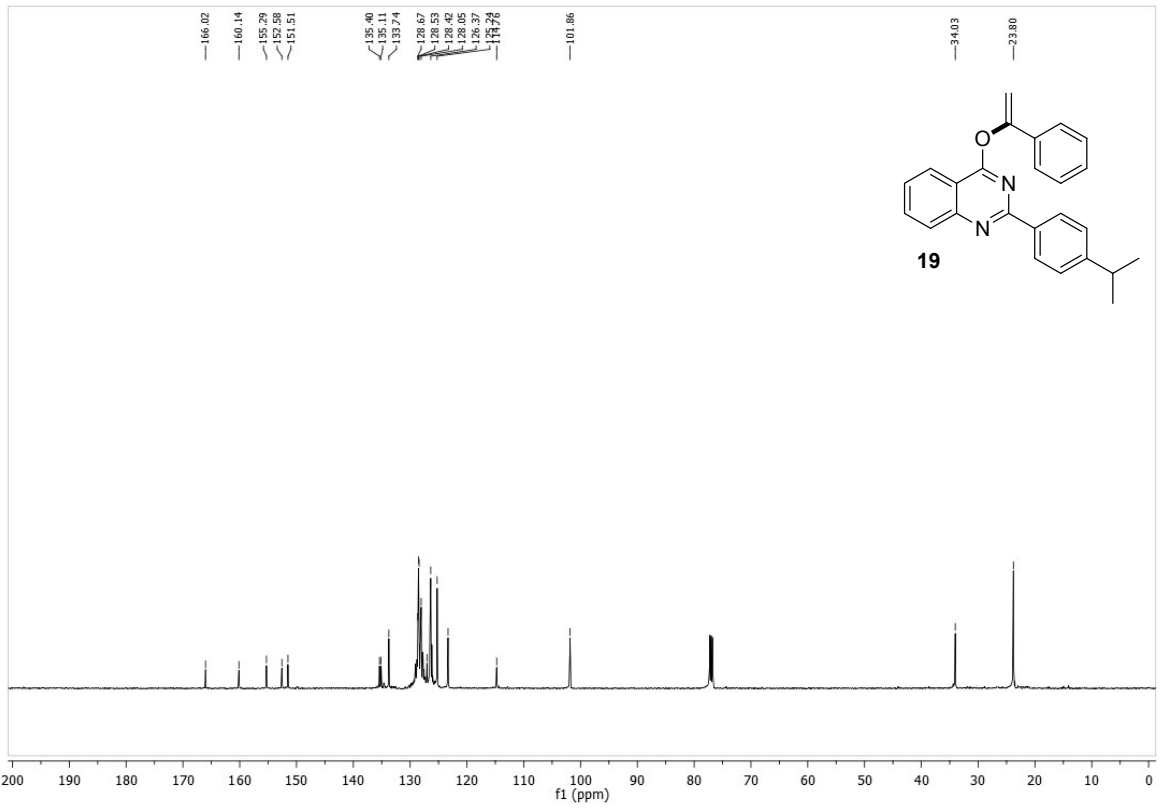

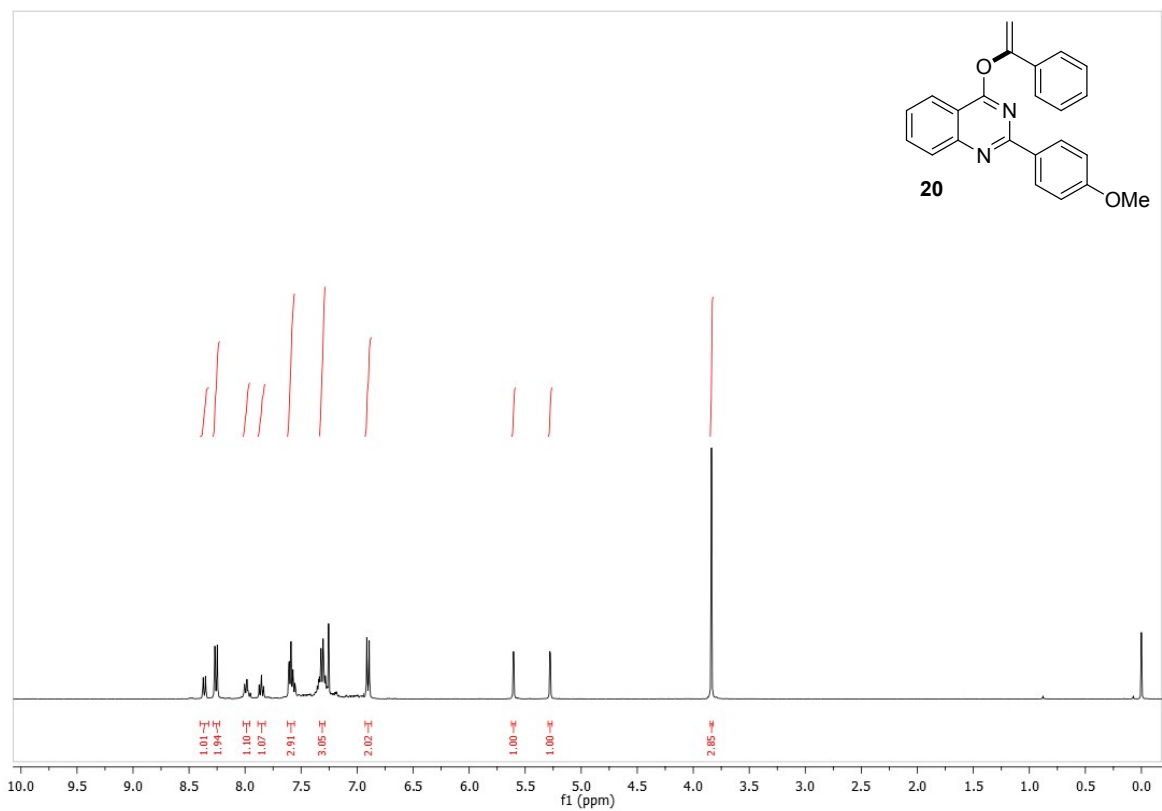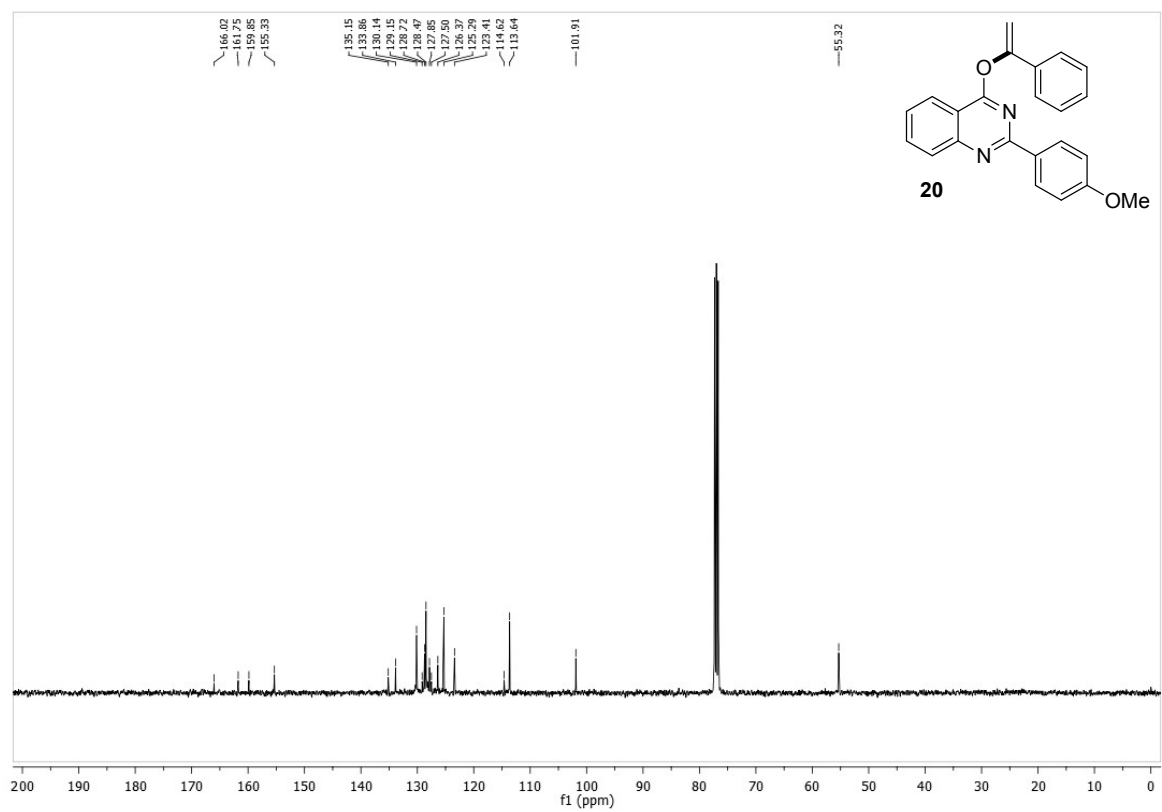

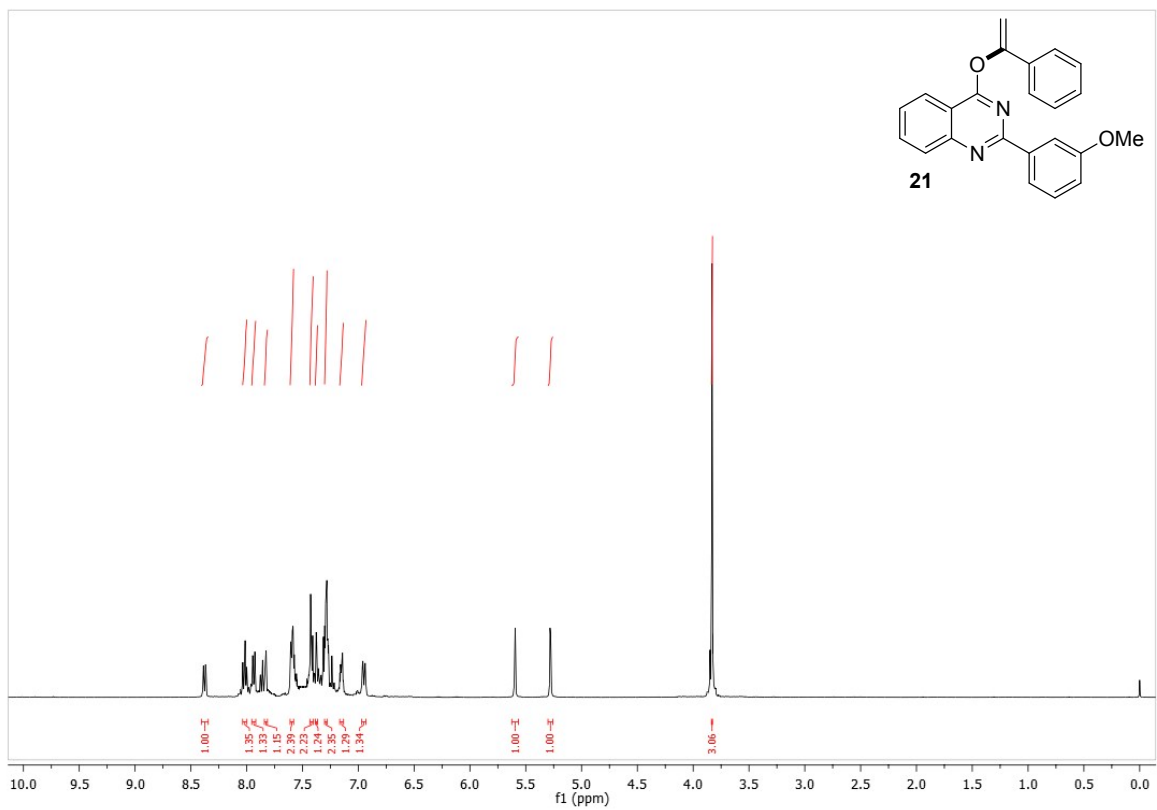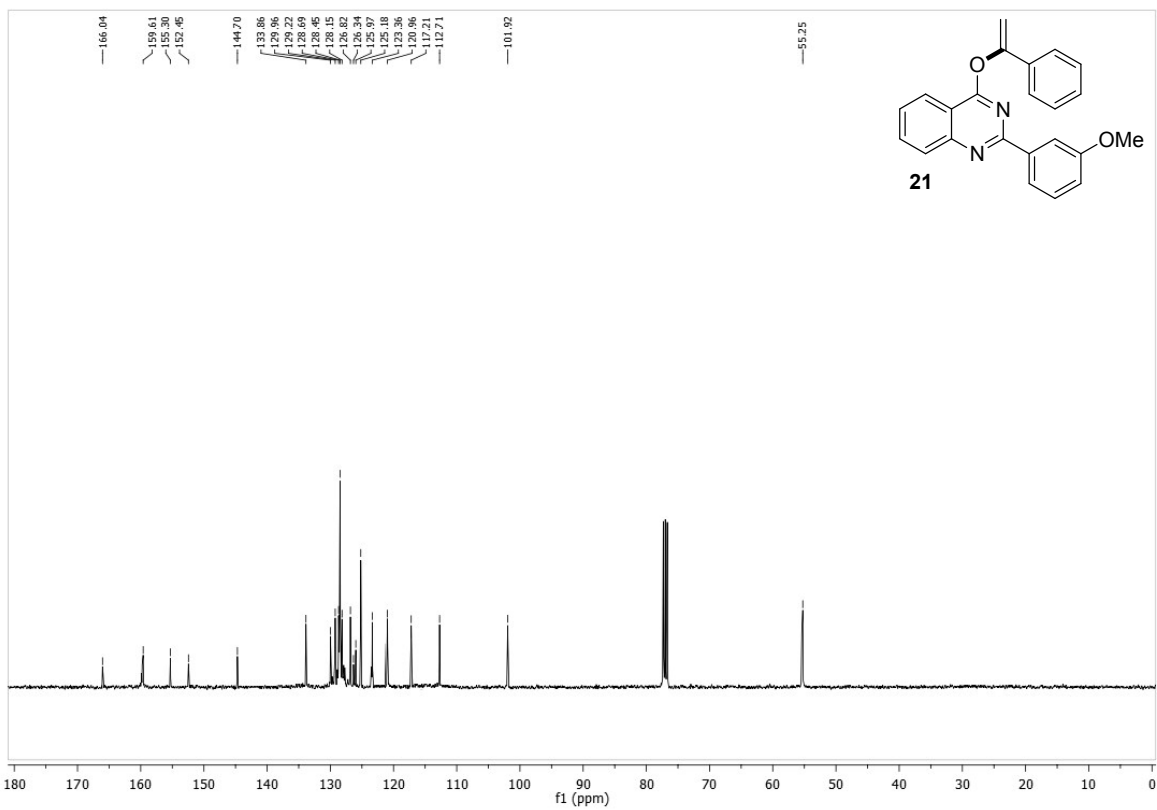

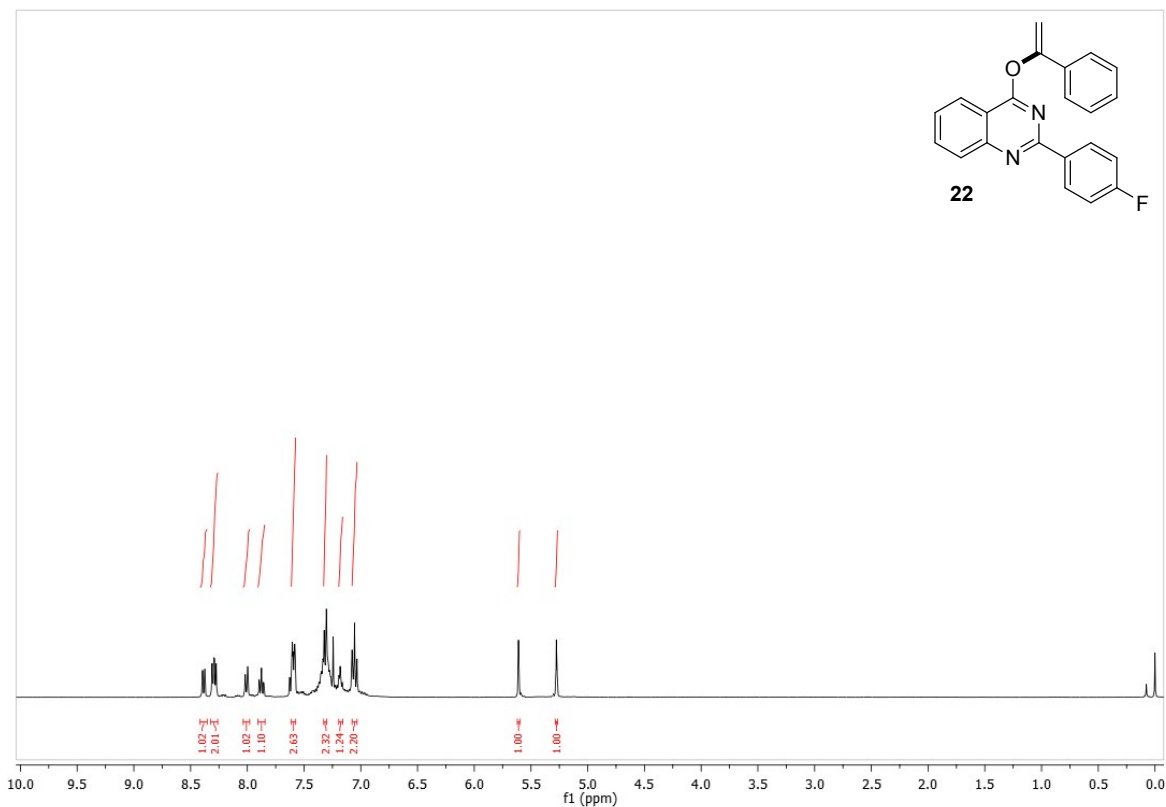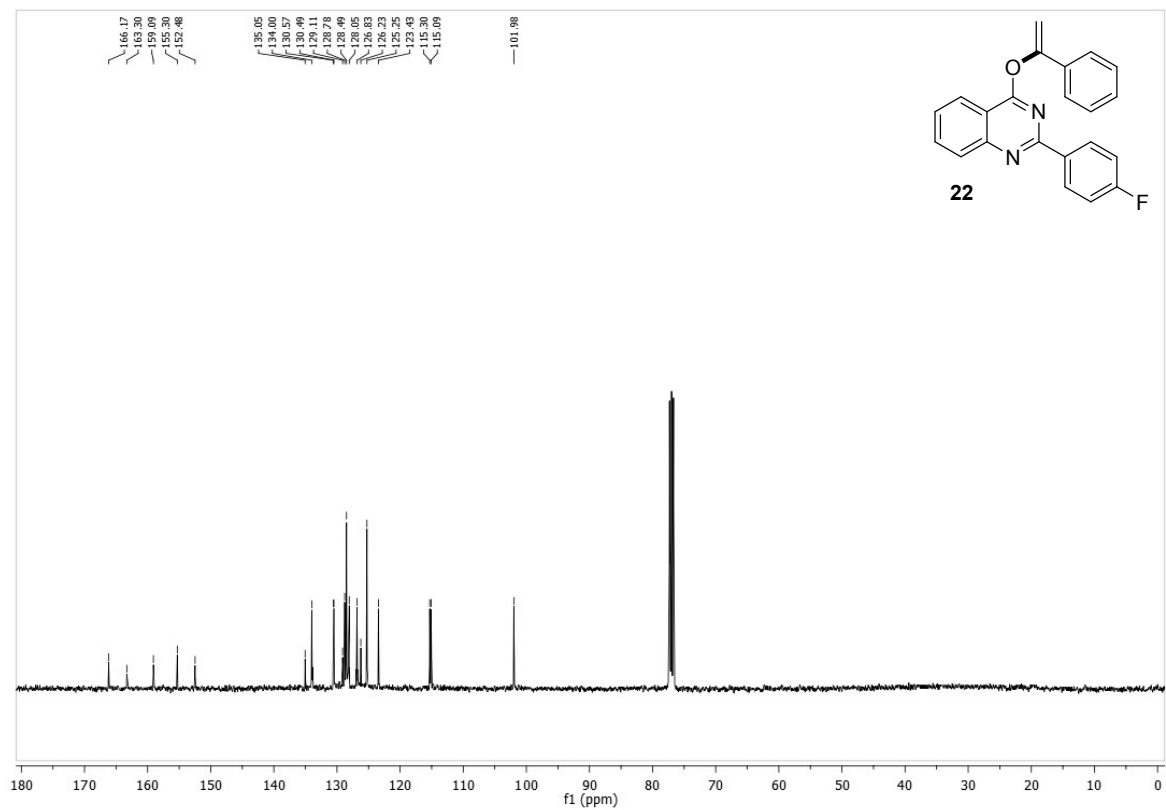

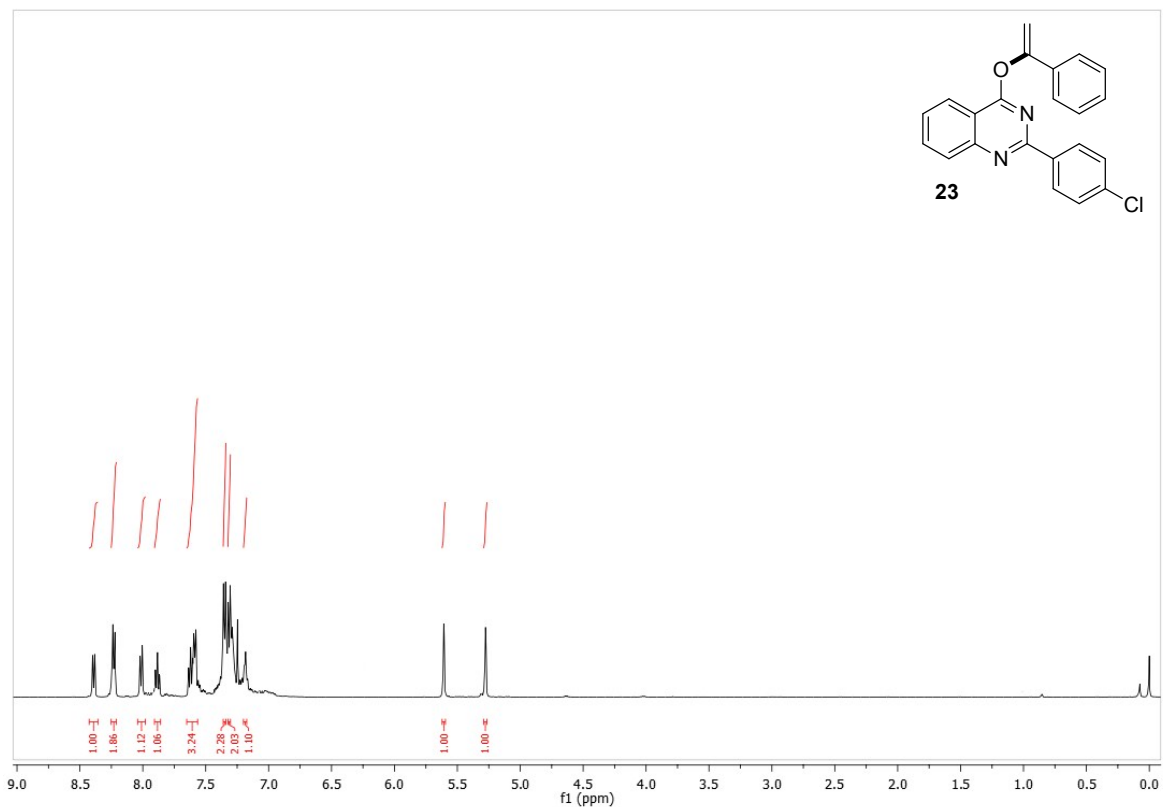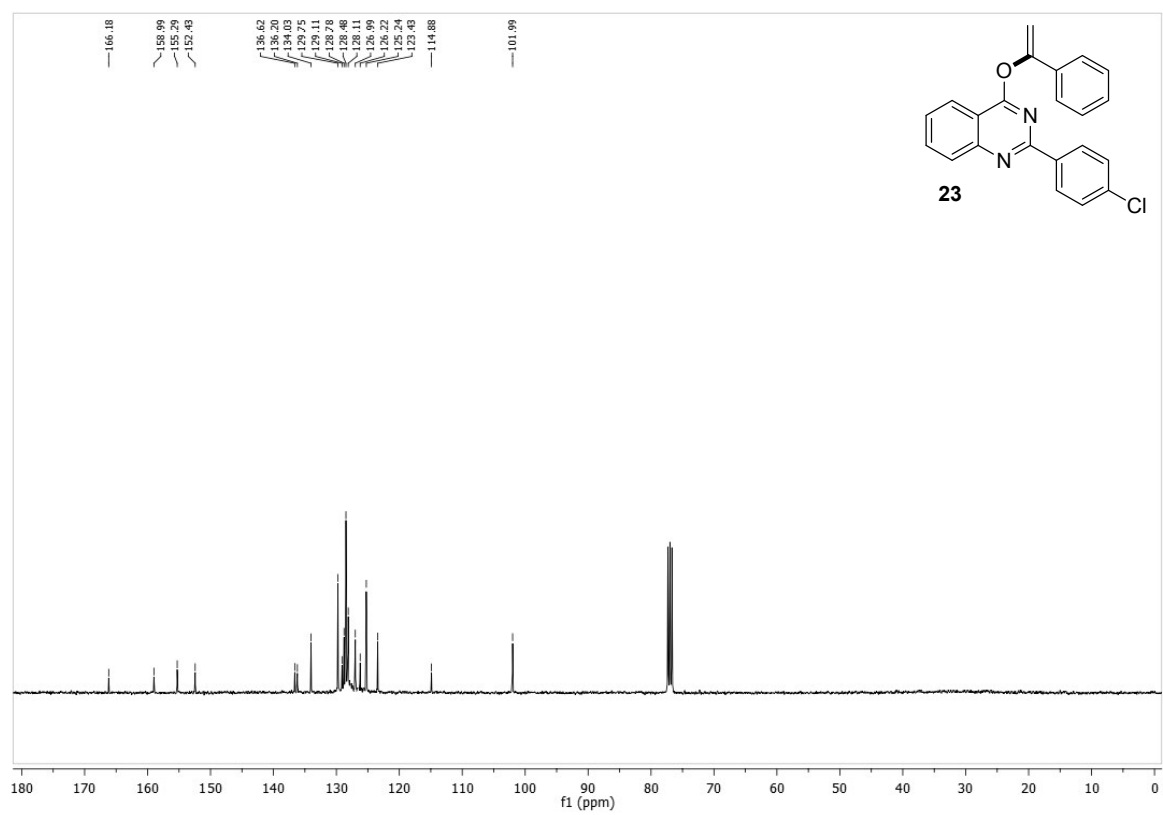

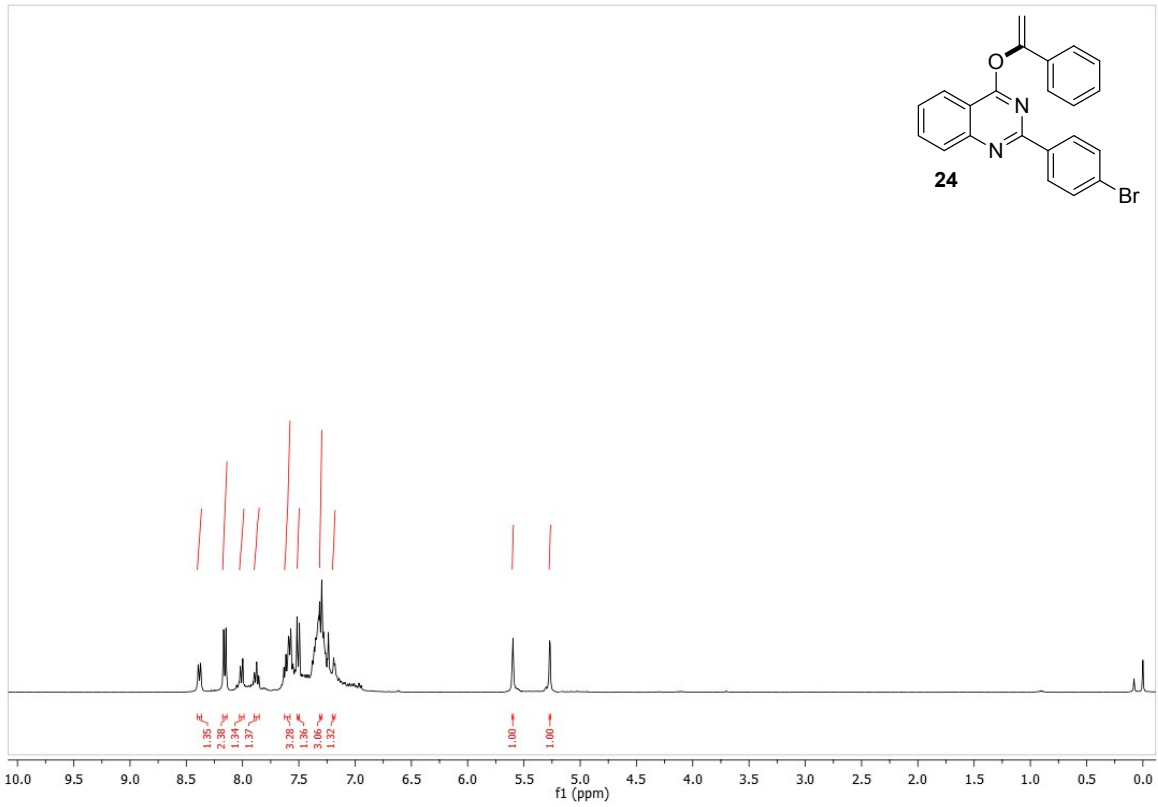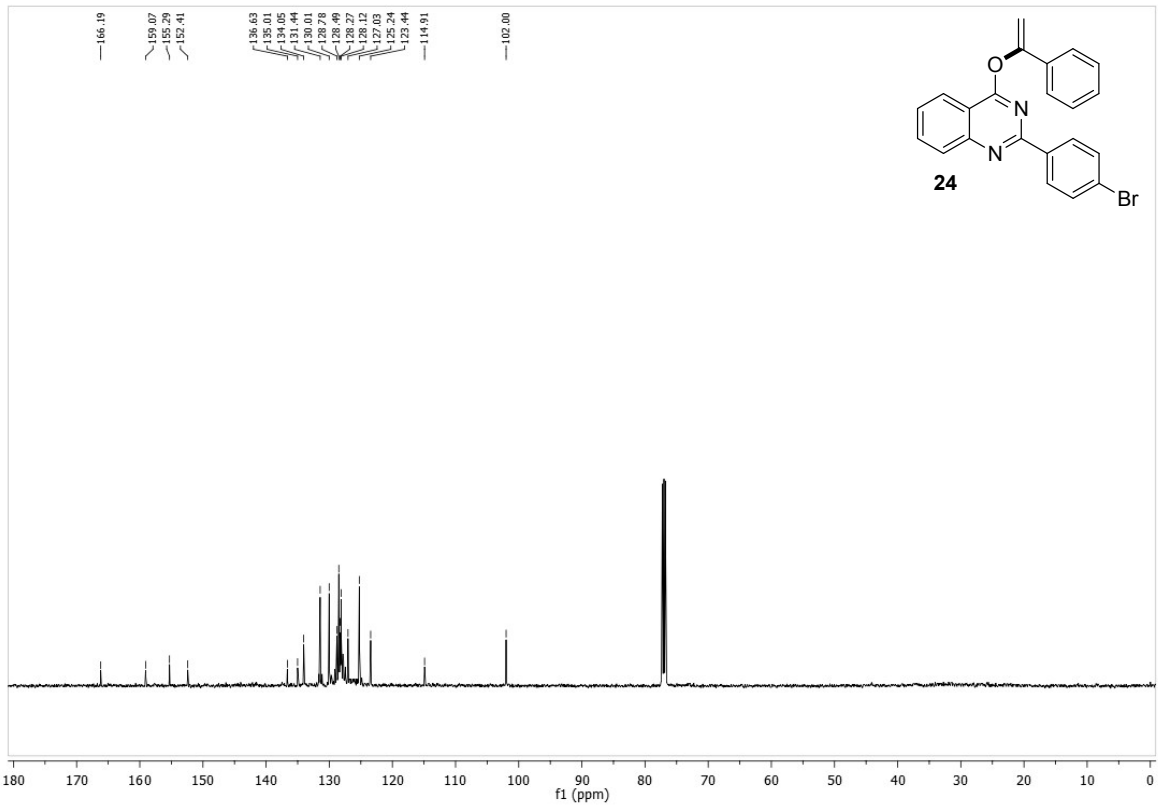



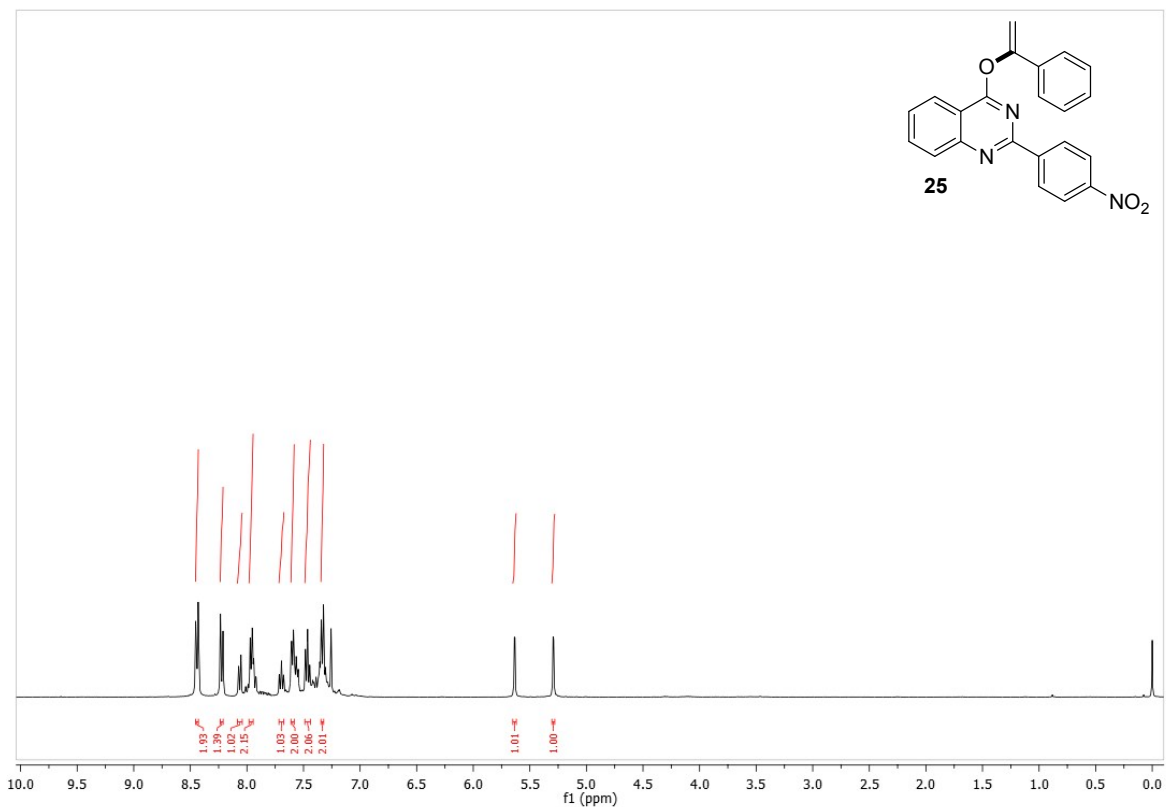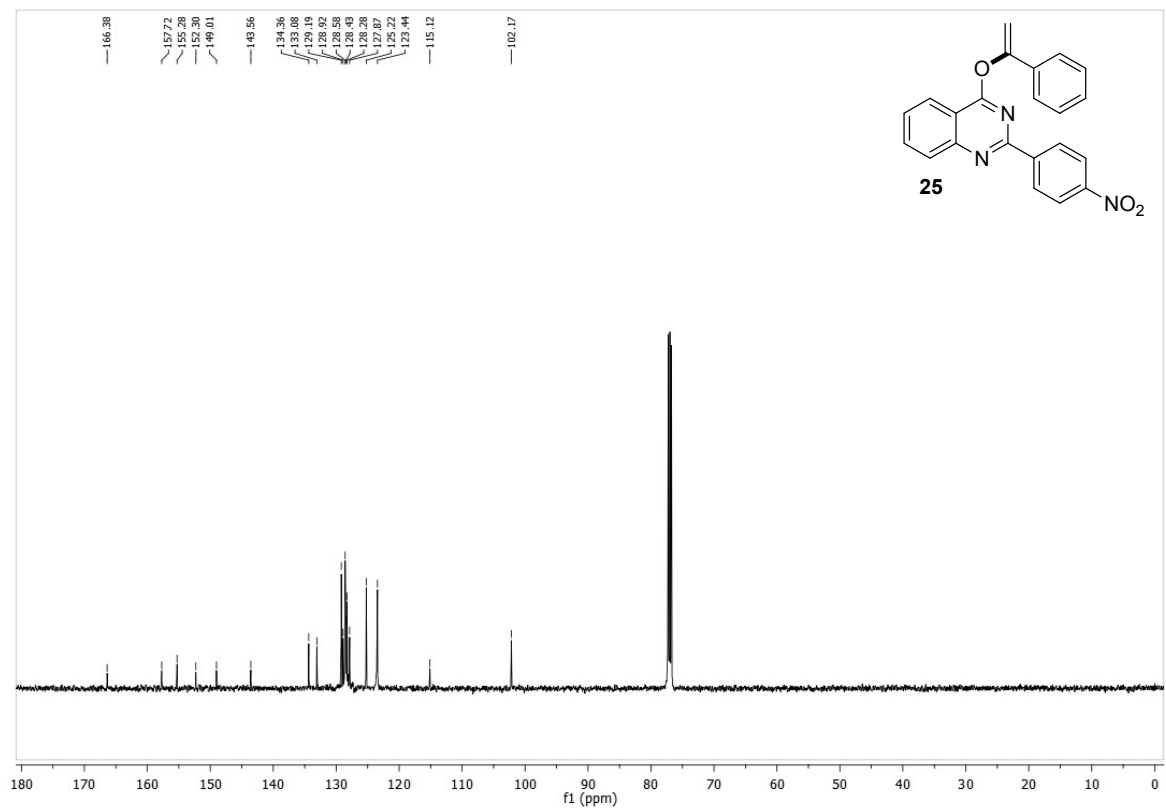

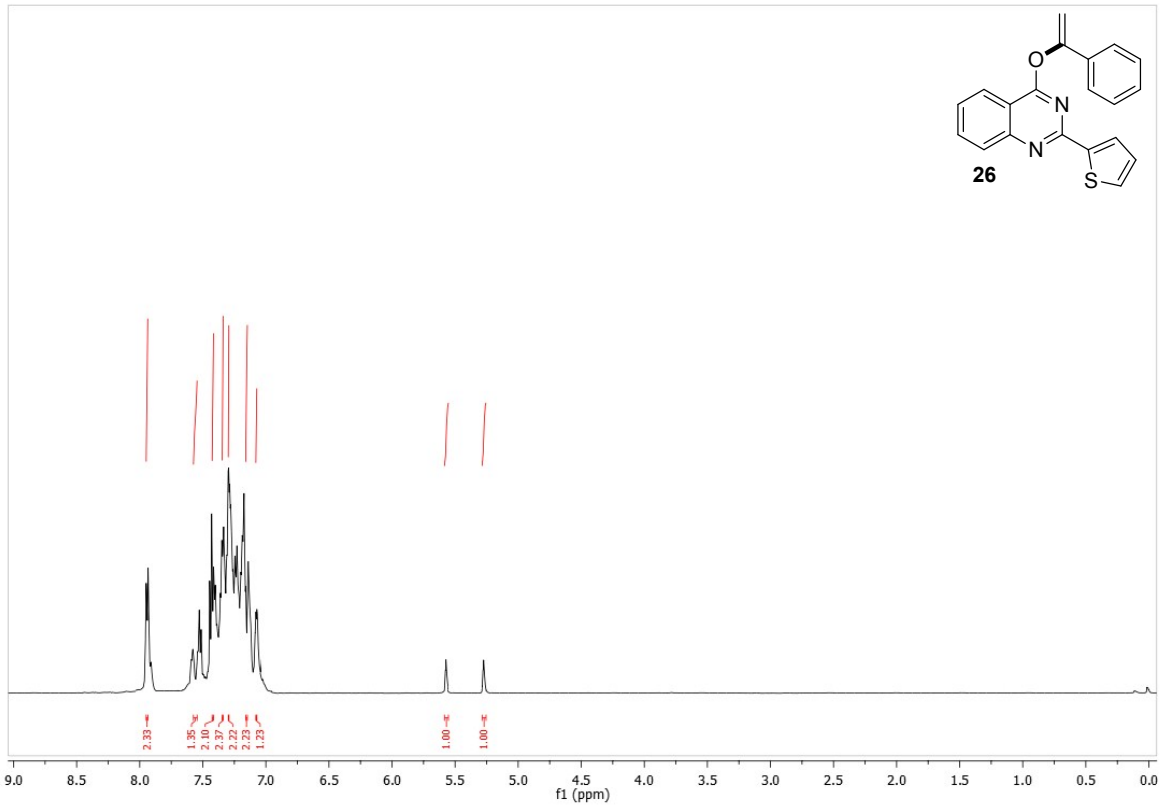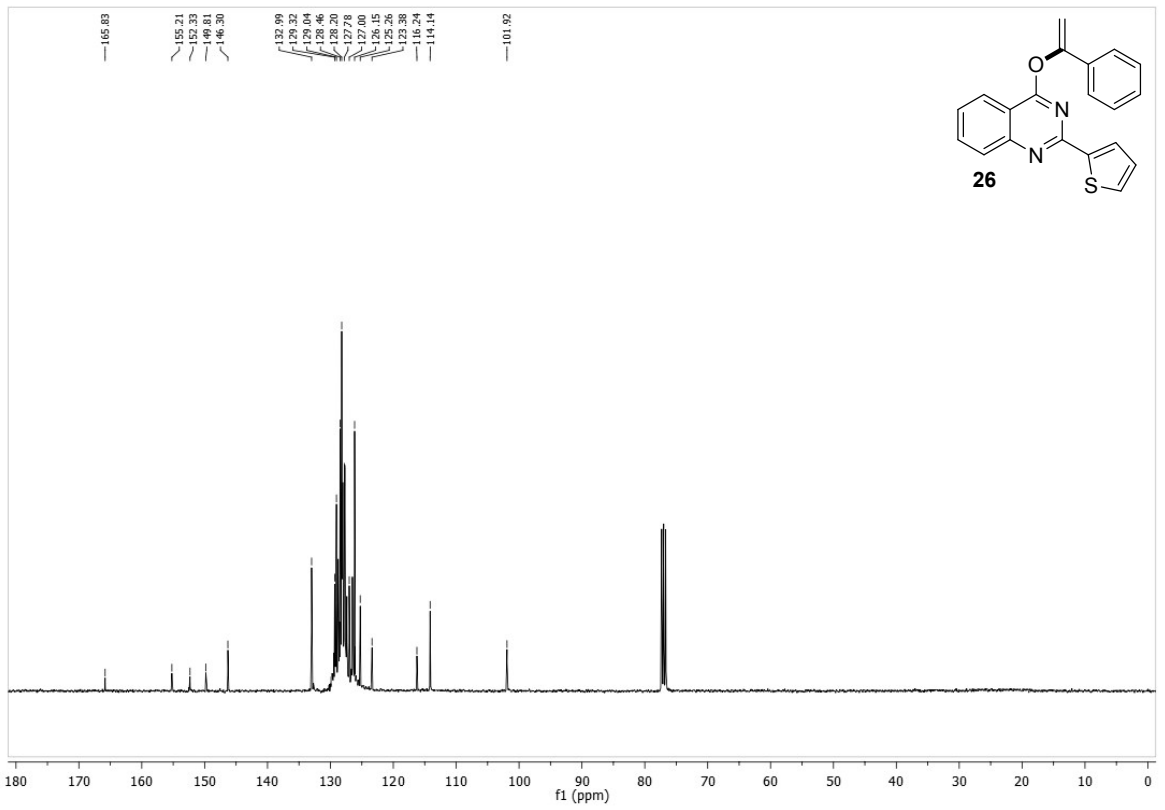

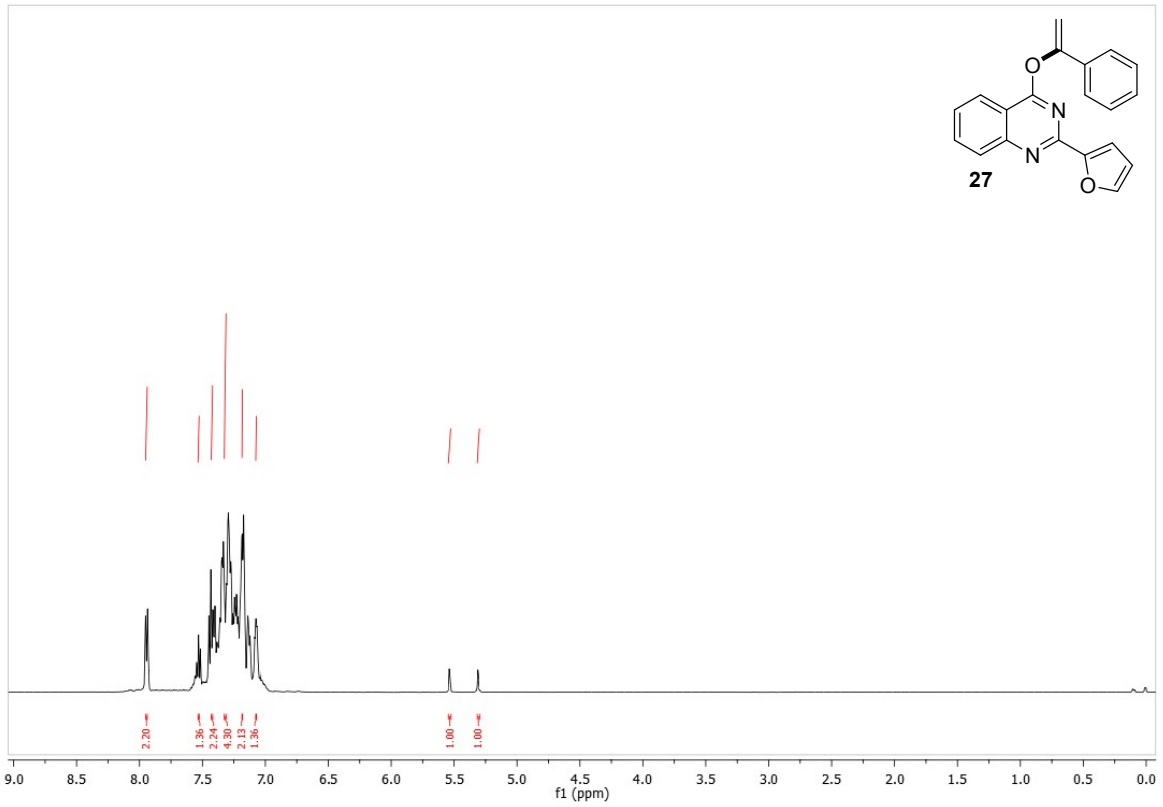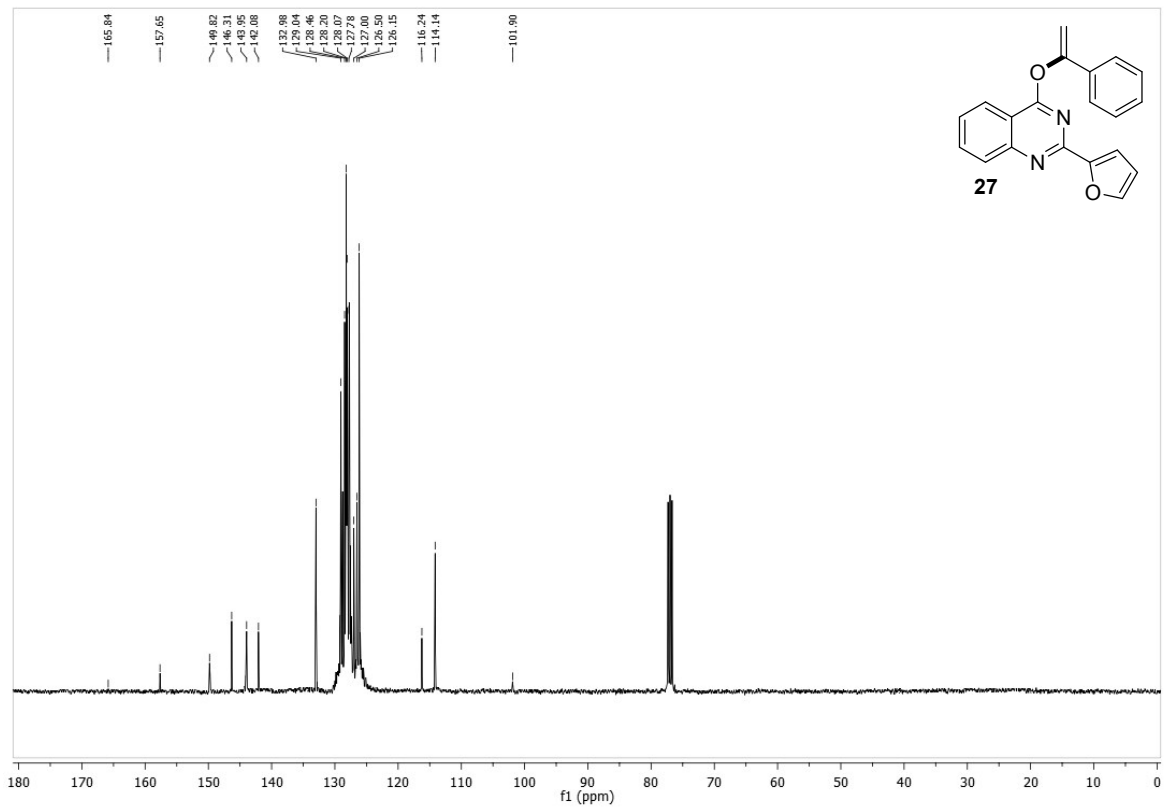

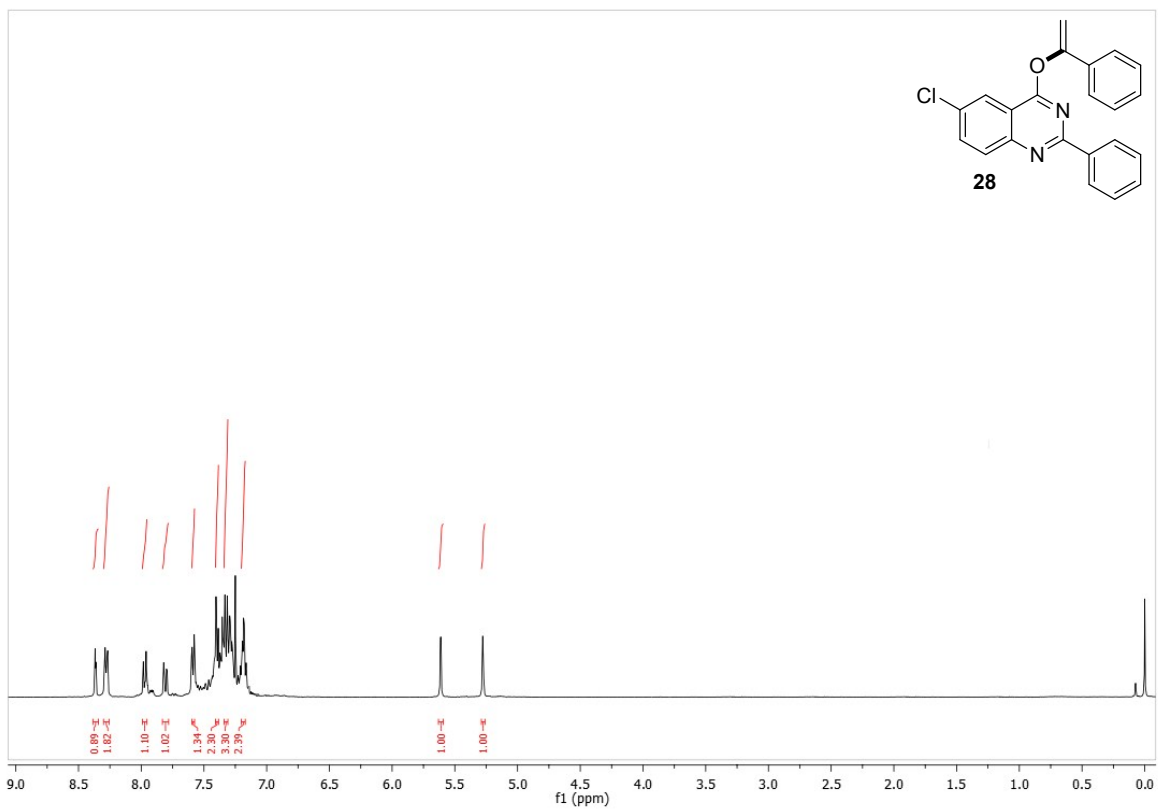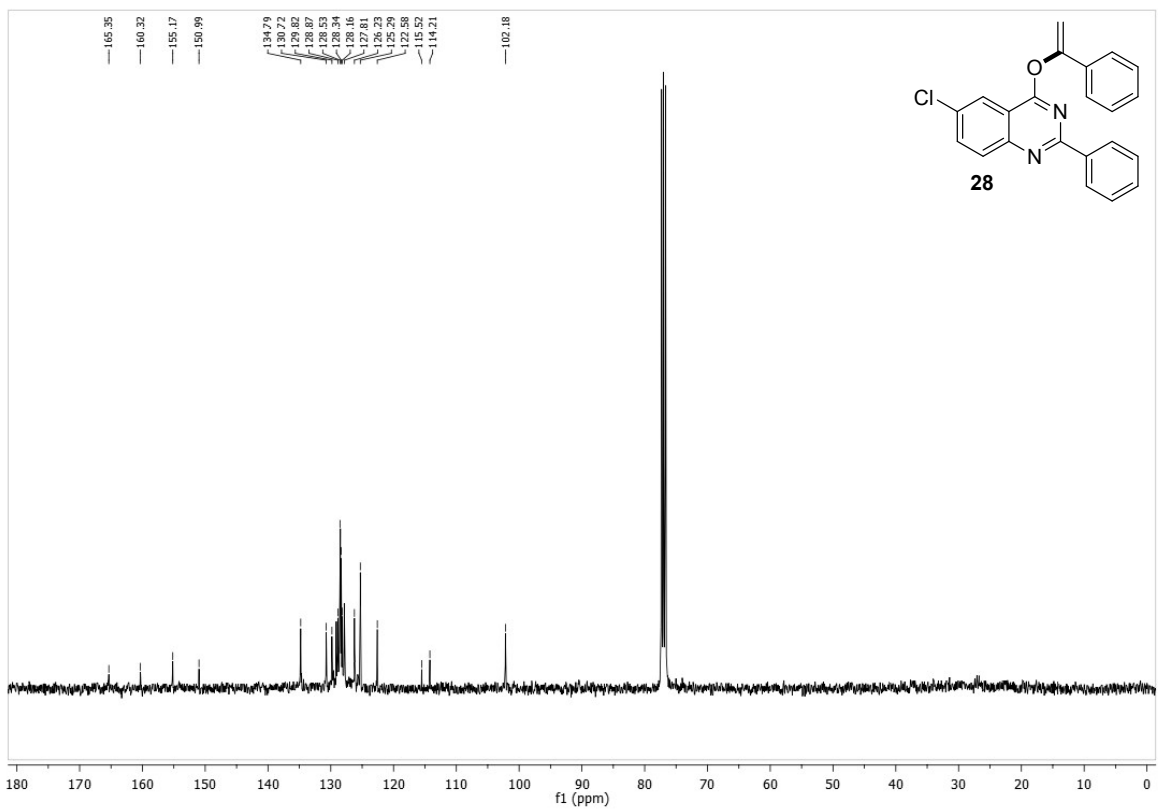

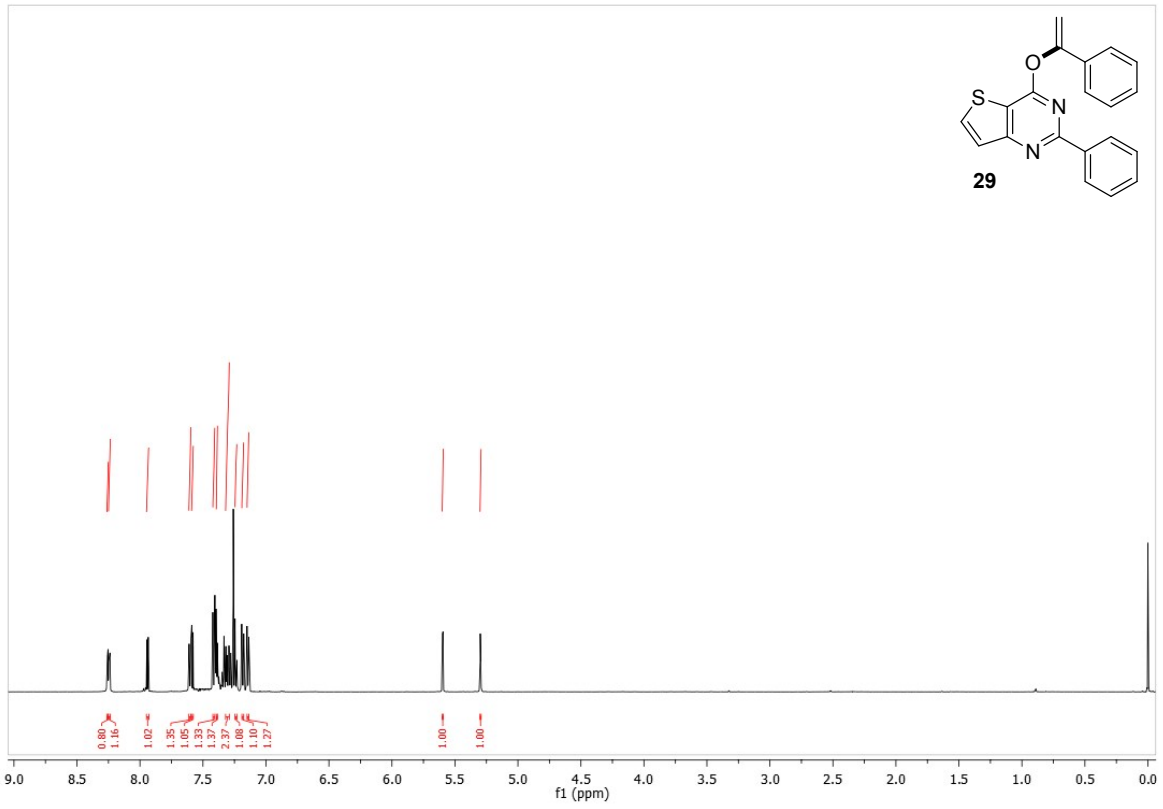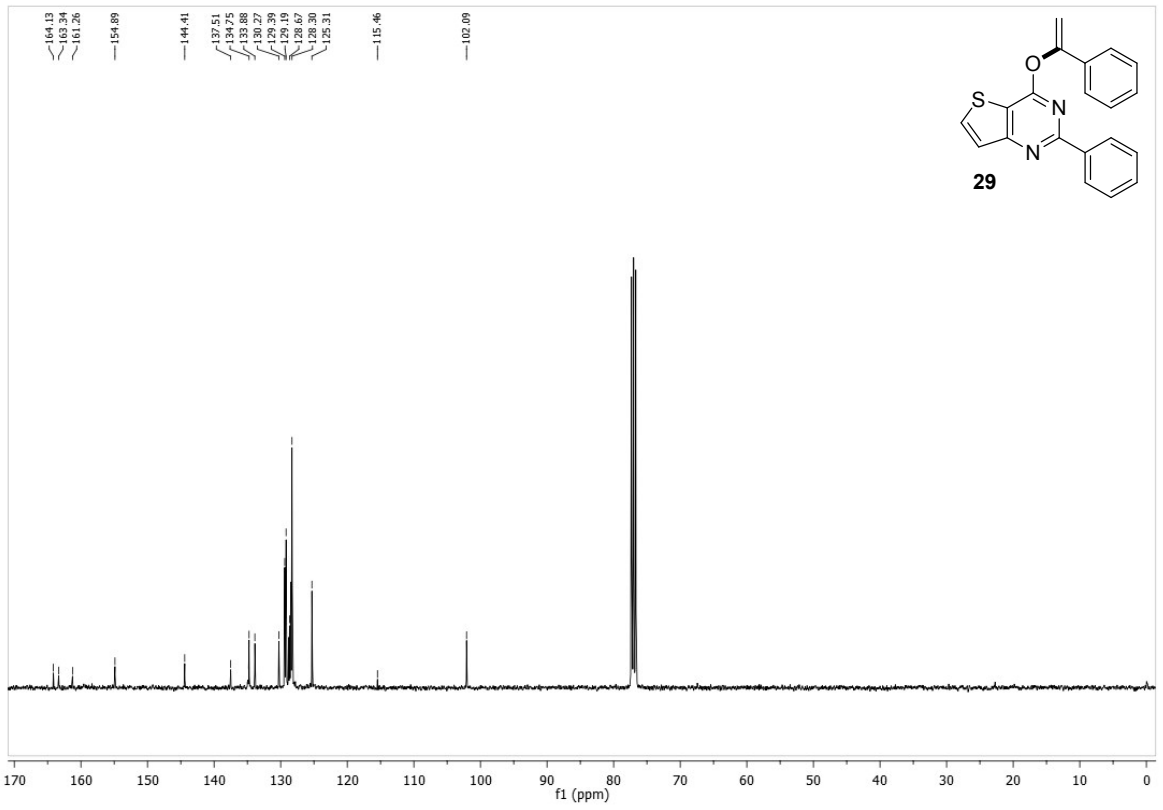

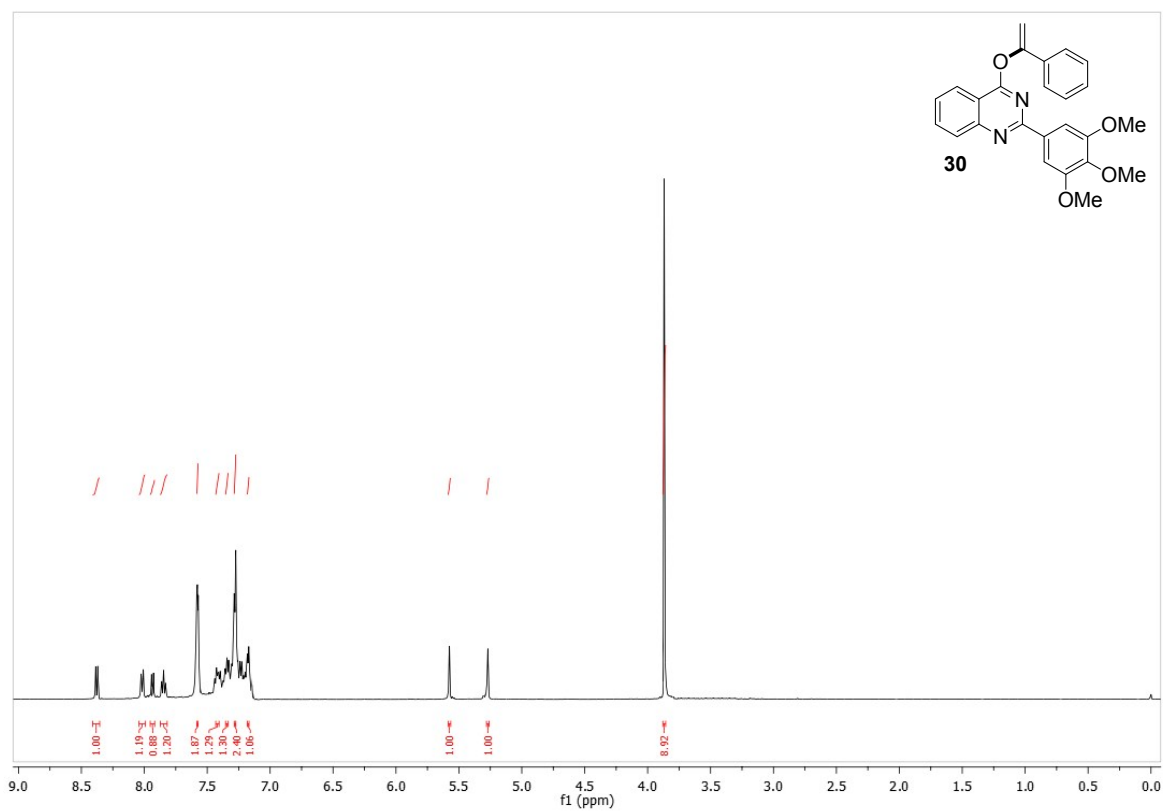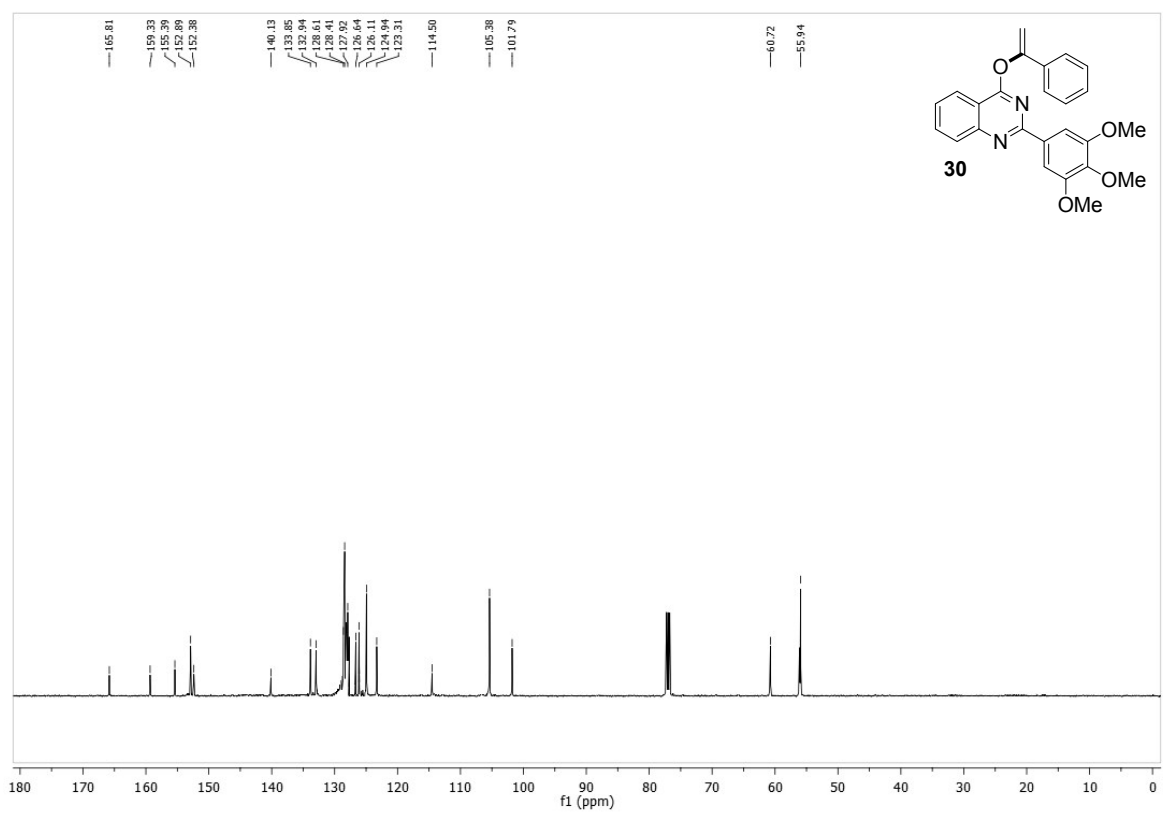

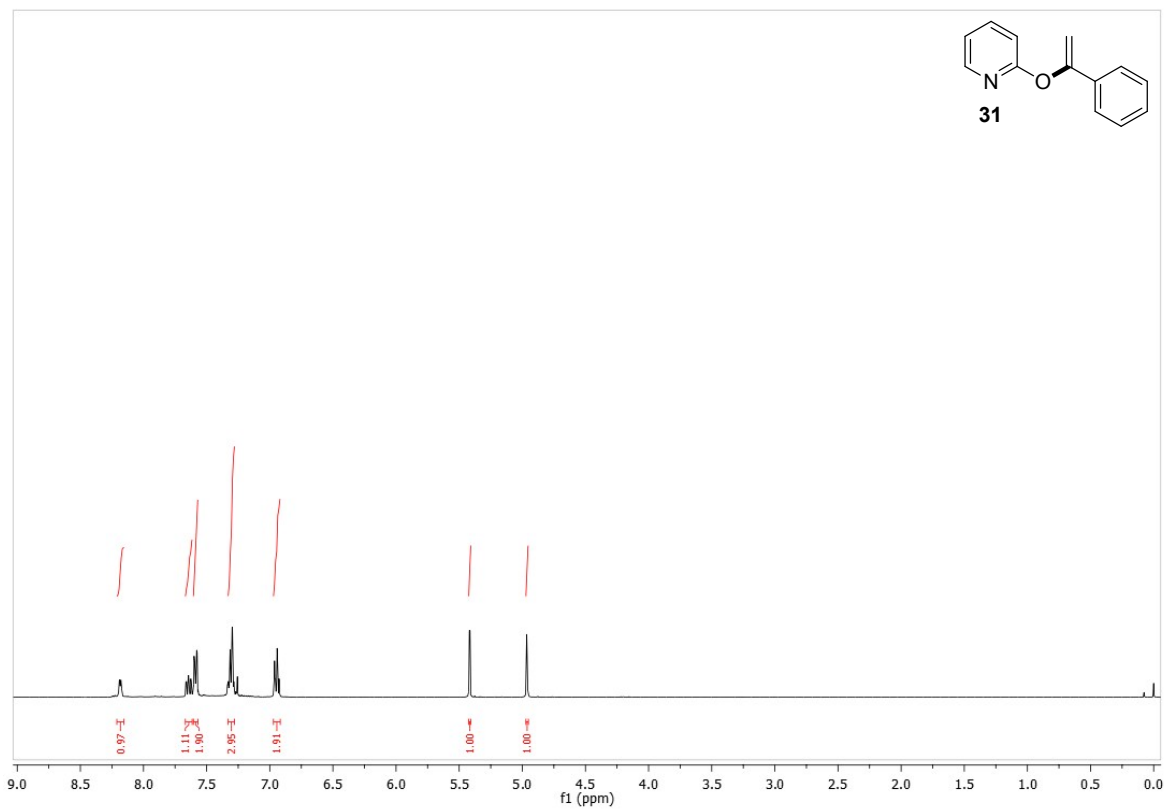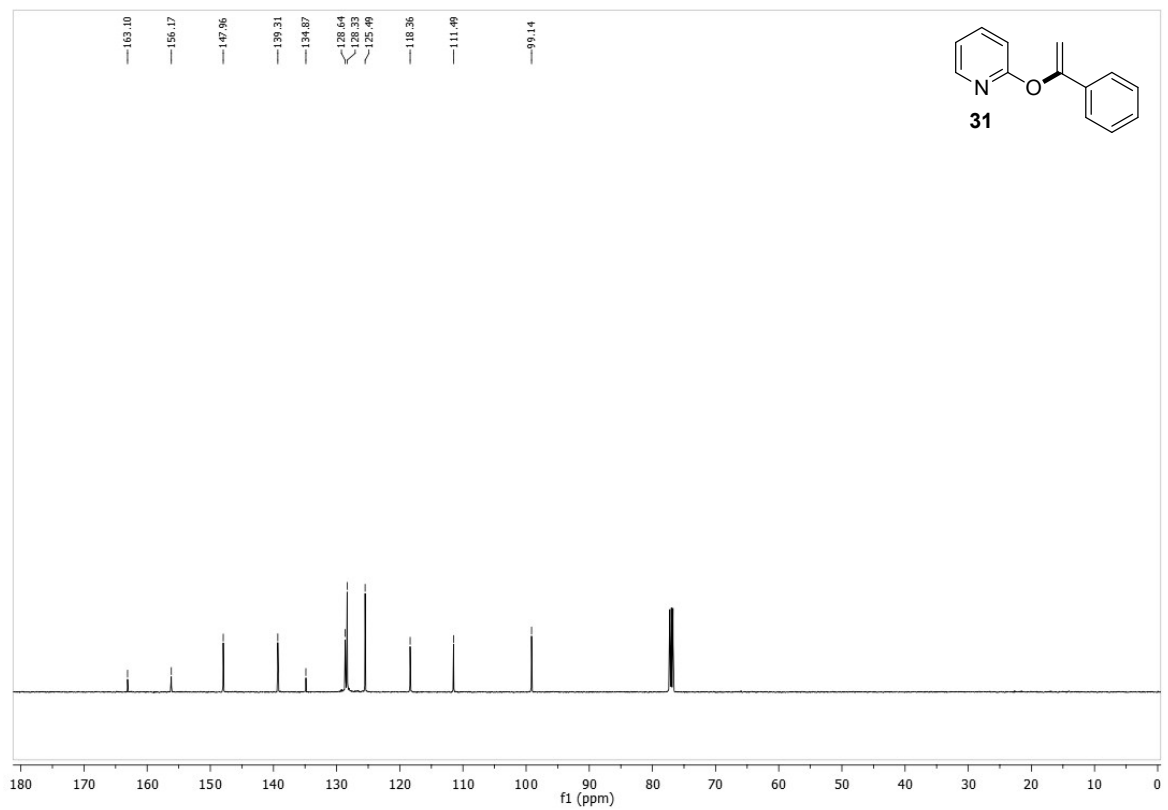

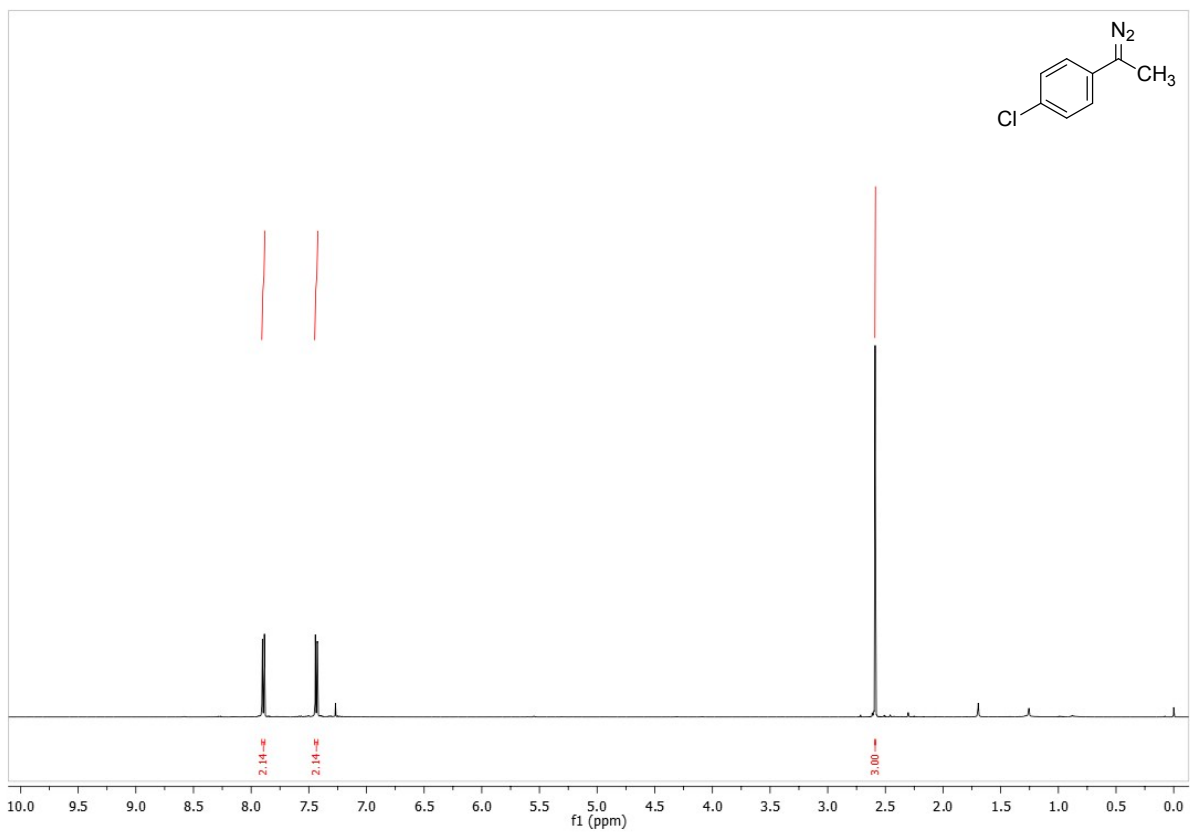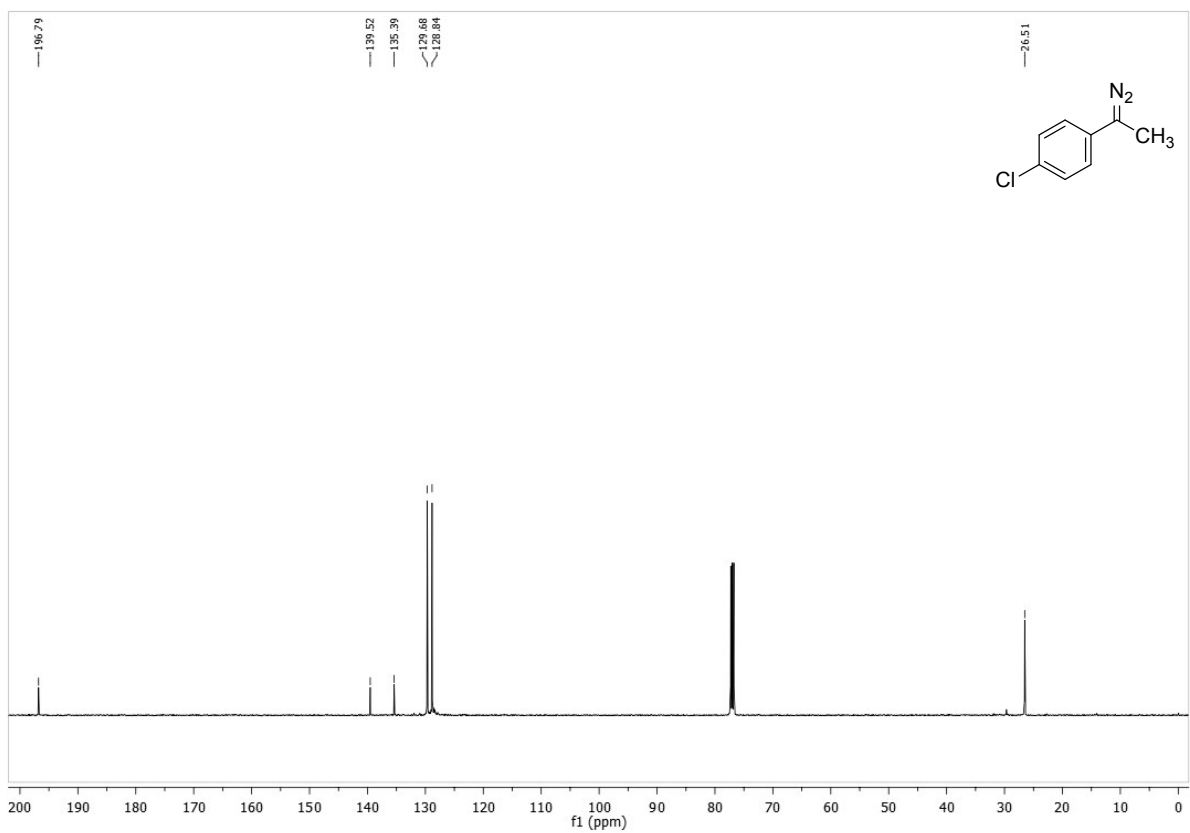



## 1.6 2D NMR Studies of 4

Chemical shifts:

$^1\text{H}$ :  $\delta$  8.40 (1H, H-5), 8.22 (2H, H-9, H-9'), 8.04 (1H, H-7), 8.02 (1H, H-8), 7.76 (1H, H-6) 7.62 (1H, H-17), 7.48 (1H, H-11), 7.46 (2H, H-10, H-10'), 7.37 (1H, H-15), 7.27 (1H, H-14), 7.20 (1H, H-16), 5.72 (1H, H<sub>b</sub>-13), 5.61 (1H, H<sub>a</sub>-13).

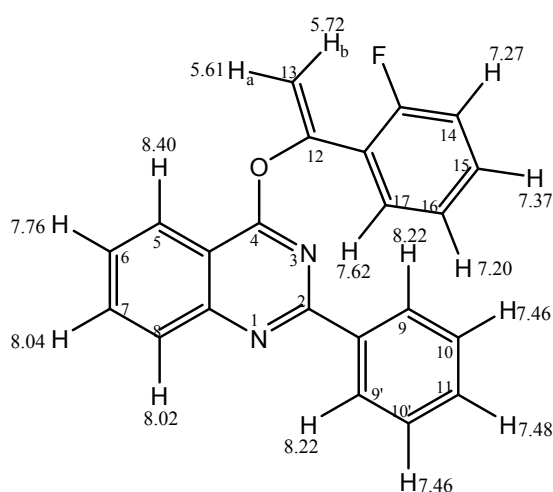

$^1\text{H}$ -Chemical shifts

$^{13}\text{C}$ : 165.41, 159.97, 158.58, 158.32, 151.79, 149.24, 136.79, 134.98, 131.04, 130.85, 128.61, 128.40, 127.85, 127.82, 124.77, 123.45, 122.63, 116.31, 114.10, 107.46, 39.50.

The structure of compound 4 was derived by extensive NMR experiments including 2-D Double Quantum Filtered Correlation Spectroscopy (DQF-COSY), Nuclear Overhauser Effect Spectroscopy (NOESY) and Heteronuclear-Single Quantum correlation (HSQC) and Heteronuclear-multiple Quantum correlation (HMBC) experiments. The resonance signal at 5.72 ppm is giving NOE with 7.62 and peak at 5.61 is interestingly showing weak intense NOE with 8.40 and 8.22 peaks. This NOE observation is initiating the resonance assignments of all the aromatic ring protons of substituted quinazoline ring system of compound 4.

Herein the NOESY correlation structure and expanded NOESY Spectrum of compound **4** (Figure 1 and 2) have been illustrated.

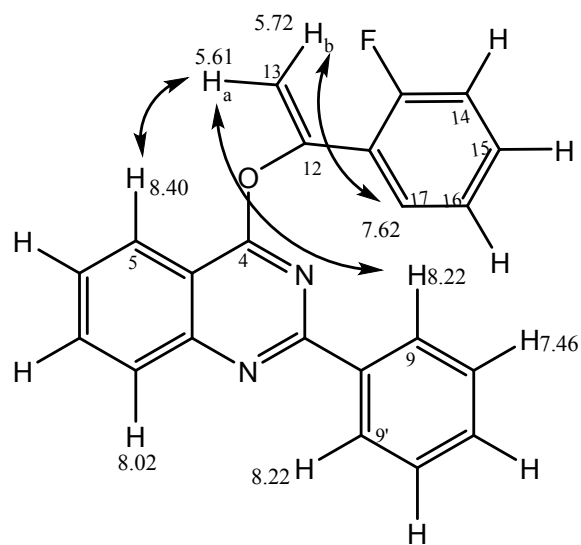

**Figure 1.** NOE correlations of H<sub>b</sub>-13/ H-17, H<sub>a</sub>-13/ H-5, H-9

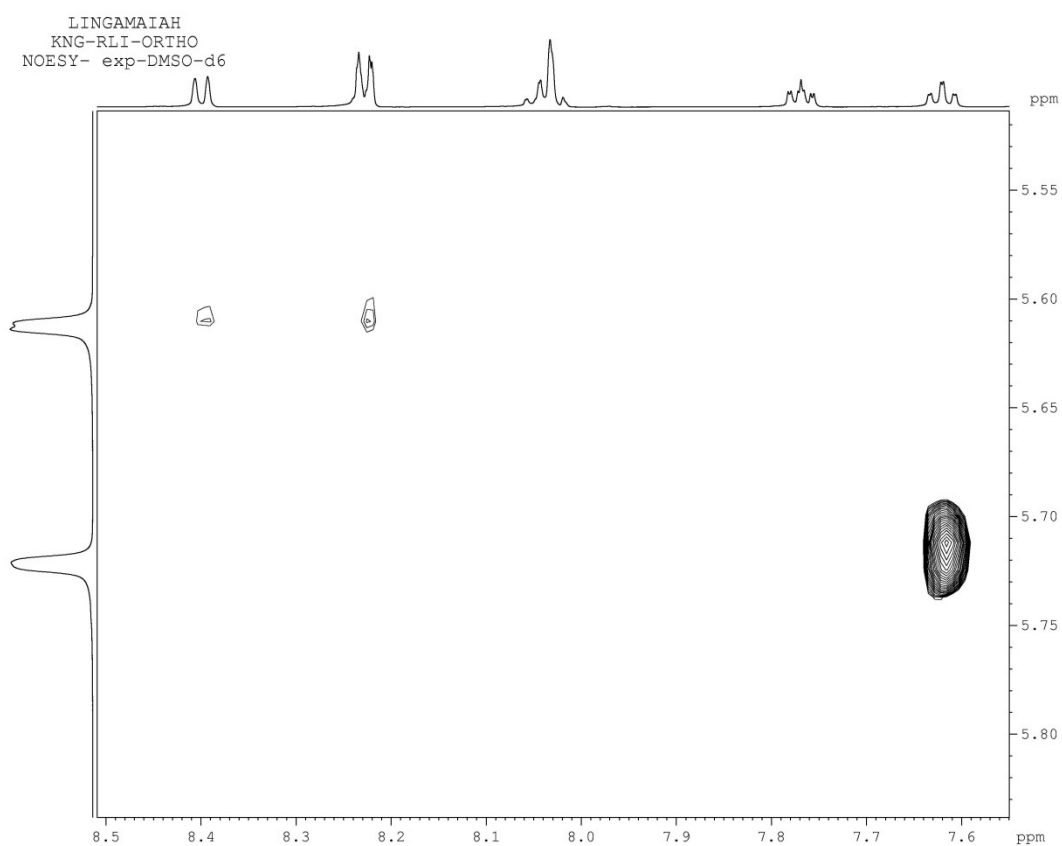

**Figure 2.** 2D-NOESY-Expansion

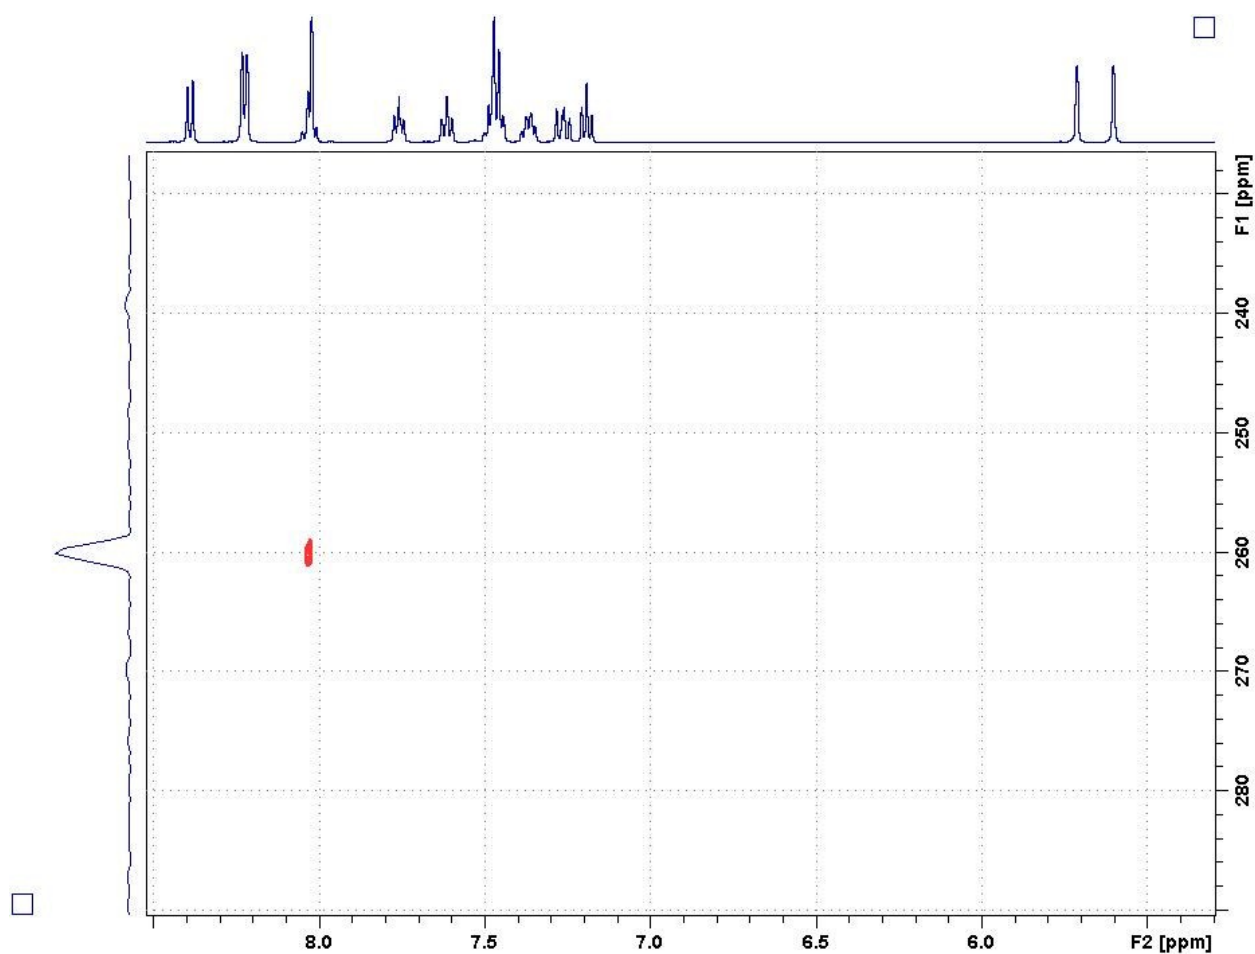

### <sup>15</sup>N-HMBC-Expansion

In Nitrogen Hetero nuclear multiple quantum correlation experiment (<sup>15</sup>N-HMBC), H-13 protons be supposed to show 3 bond correlation with Nitrogen (N-2) if fluoro, vinyl substituted phenyl ring was present on (N-2) of the molecule. But observed significant 3-bond correlation between Nitrogen (N-1) and H-8 ( $\delta$  8.02) and observed not even 4 bond correlations between N-1 and H-9 ( $\delta$  8.22) of the molecule. Remaining spectral assignments were in agreement with assigned structure depicted in Figure 1.

DEPT-135 NMR spectrum of compound 4

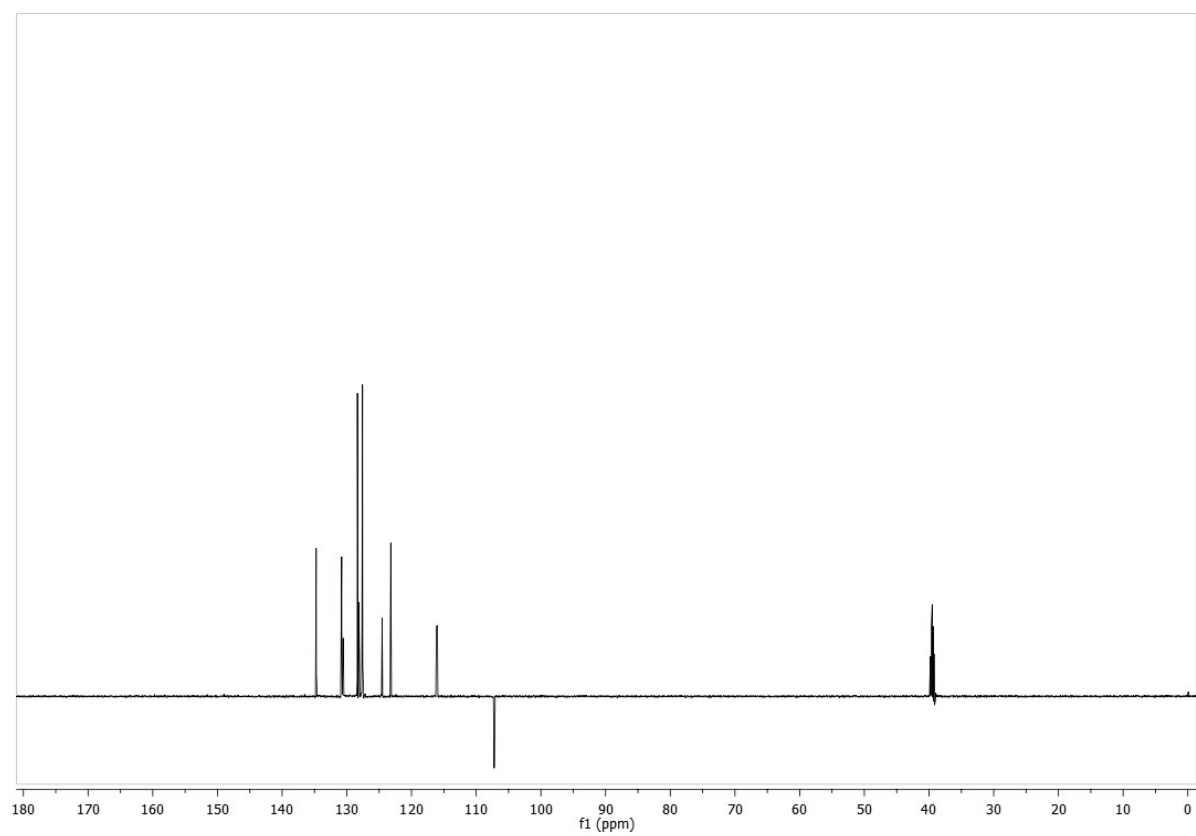

## 1.7 X-ray crystallography for 4

The CCDC deposition number for **4** is **1514723**; Crystal data:  $C_{22}H_{15}N_2OF$ ,  $M = 342.36$ ,  $0.45 \times 0.32 \times 0.20 \text{ mm}^3$ , monoclinic, space group  $C2/c$  (No. 15),  $a = 38.444(4)$ ,  $b = 6.2239(6)$ ,  $c = 14.5234(13) \text{ \AA}$ ,  $\beta = 96.834(3)^\circ$ ,  $V = 3450.4(6) \text{ \AA}^3$ ,  $Z = 8$ ,  $D_c = 1.318 \text{ g/cm}^3$ ,  $F_{000} = 1424$ , CCD area detector,  $\text{MoK}\alpha$  radiation,  $\lambda = 0.71073 \text{ \AA}$ ,  $T = 293(2) \text{ K}$ ,  $2\theta_{\text{max}} = 56.6^\circ$ , 19058 reflections collected, 4173 unique ( $R_{\text{int}} = 0.030$ ), Final  $\text{GooF} = 1.03$ ,  $R1 = 0.0443$ ,  $wR2 = 0.1325$ ,  $R$  indices based on 4173 reflections with  $I > 2\sigma(I)$  (refinement on  $F^2$ ), 235 parameters,  $\mu = 0.089 \text{ mm}^{-1}$ , Min and Max Resd. Dens. =  $-0.17$  and  $0.26 \text{ e/\AA}^3$ . X-ray data for the compound were collected at room temperature using a Bruker Smart Apex CCD diffractometer. CCDC **1514723** contains the supplementary crystallographic data for this paper which can be obtained free of charge at <https://summary.ccdc.cam.ac.uk/structure-summary-form> or from the Cambridge Crystallographic Data Centre (CCDC), 12 Union Road, Cambridge CB2 1EZ, UK; fax: +44(0) 1223 336 033; email: [deposit@ccdc.cam.ac.uk](mailto:deposit@ccdc.cam.ac.uk).

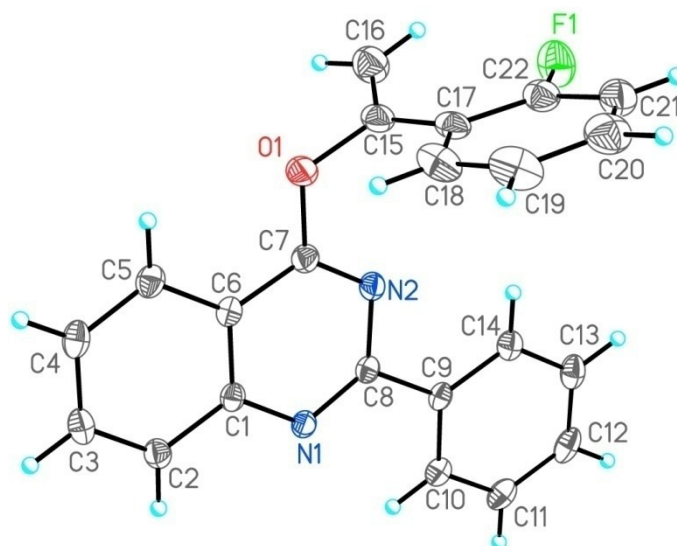

**Figure 3.** ORTEP diagram for compound **4**, with displacement ellipsoids drawn at the 20% probability level.
